# Supplementary material
Source: publisher figshare collection journal article supplement (https://tandf.figshare.com/articles/dataset/_/9829538)

## Supplementary files

**Figure S1: Read count distribution.** Total (A) and unique (B) read counts are shown for each biological replicate. On average, 150,000 reads corresponding to approximately 1700 to 2900 unique miRNAs with a minimum of 5 read counts, were identified across all samples.

**Figure S2: Side by side comparison of canonical and variant miRNA expression reveal consistent response to nanoparticles.** A slightly better distinction of exposure duration was observed for the variant containing miRNAs (isomiRs). The dotted red square includes all samples (coloured symbols) exposed for 6h and the dotted black square all the samples exposed to nanoparticles for 24h.

**Figure S3: Integrative miR:mRNA transcriptome correlation-based miRNA target prediction.** (A) Heatmap of correlated (cutoff  $>|0.7|$ ) miR:gene pairs, for 6 hours and 24 hours exposures. (B) Venn comparisons of correlated miRs and genes between time points. (C) Biological processes enriched by correlated genes that were common to 6h and 24 exposures (red box), unique to 24h exposures (blue box) or unique to 6h exposures (black box).

**Figure S4: Side by side heatmaps of correlated miRs (left) and genes (right).** MiR and mRNA transcriptome were profiled in same total RNA pool obtained from unexposed (Ctrl) THP-1 cells or THP-1 cells exposed to titanium dioxide (nTi), zinc oxide (nZn) and silver (nAg) nanoparticles, for 6h or 24h.

**Figure S5: Venn comparison between miRs (A) identified to have a high correlation (cutoff  $>|0.7|$ ) with mRNA expression and those identified as differentially expressed following 24h exposure to silver nanoparticles (nAg). Similarly, mRNAs that correlated with miR expression (cutoff  $>|0.7|$ ) were compared to those that were differentially expressed as a result of 24h exposure to silver nanoparticles (B). The topmost enriched biological processes, represented by the unique mRNAs from the set of compared mRNAs in (B), are depicted in (C) and (D). FDR is the false discovery rate.**

**Figure S6: Venn comparison of differentially expressed genes (*Benjamini-Hochberg*  $FDR < 0.05$ ,  $\log_2$  difference  $> 0.58$ ) in cells exposed to bulk-sized ZnO particles (bZnO – 300 nm), nano-sized ZnO particles (nZnO – 20 nm), Ag nanoparticles (nAg – 20 nm) and non-particulate nitric acid silver [Ag (1+)] is shown in (A). Response to metal (zinc, copper, cadmium) ion is the most enriched pathway represented by shared (10 genes in all exposures and 37 genes particle-based exposures) differentially expressed genes (B). Metal ion response related pathways are highlighted in green.**

**Figure S7: Relative expression of selected miRNAs, as quantified by RT-PCR.** Seq denotes expression as determined by small RNA sequencing while qPCR denotes the relative expression determined via real time PCR. Real time PCR expression was determined relative to endogenous RNU48 expression. Y-axis is  $\log_2$ -transformed, normalized count data from small RNAseq, and  $\log_2$ -transformed relative qPCR expression using the ddCt method. Error bars indicate mean and SEM from three (smallRNAseq) or four (qPCR) replicates.

| Sequence                 | log2 FC.Ctrl6h/nAg6h | log2 FC.Ctrl6h/nTiO2-6h |
|--------------------------|----------------------|-------------------------|
| AACATAGCGAGACCCCGTCTCC   | 1.52                 | NaN                     |
| AACATAGCGAGACCCCGTCTCCT  | 1.48                 | NaN                     |
| AACATAGCGAGACCCCGTCTCTTT | 1.54                 | NaN                     |
| ACATCACCCCATAAACAC       | 0.97                 | NaN                     |
| ACTCCCACTGCTTCACTTGACT   | 1.06                 | NaN                     |
| AGAGGTAGTAGGTTGCATAGT    | NaN                  | NaN                     |
| AGAGGTAGTAGGTTGCATAGTT   | NaN                  | -0.55                   |
| ATAGCGAGACCCCGTCTCC      | 1.35                 | NaN                     |
| ATAGCGAGACCCCGTCTCCT     | 1.39                 | NaN                     |
| ATAGCGAGACCCCGTCTCTG     | 1.37                 | NaN                     |
| ATATAATACAACCTGCT        | NaN                  | NaN                     |
| ATATAATACAACCTGCTAAGC    | NaN                  | NaN                     |
| ATATAATACAACCTGCTAAGT    | NaN                  | NaN                     |
| ATCACATTGCCAGGGATTTCAG   | NaN                  | NaN                     |
| ATCATATTTACCAACC         | -0.91                | NaN                     |
| ATCCCACCACTGCCACC        | NaN                  | NaN                     |
| ATCCCACCGCTGCCAC         | NaN                  | NaN                     |
| ATCCCACCGCTGCCACC        | 0.4                  | 0.45                    |
| ATCCCACCGCTGCCATC        | NaN                  | NaN                     |
| ATCCCACCTCCTGACAC        | NaN                  | NaN                     |
| ATCCCAGCGGGGCCTCC        | 0.9                  | 0.63                    |
| ATCCCAGCGGTGCCTCC        | 0.97                 | 0.7                     |
| ATCCCAGTAGAGCCTCC        | NaN                  | NaN                     |
| ATCCCATCCTCGTCGC         | NaN                  | NaN                     |
| ATTCTCAGCGCGGCTG         | 1.44                 | NaN                     |
| ATTCTCAGCGCGGCTGT        | 1.41                 | NaN                     |
| CAAAACGTGAGGCGCTGCT      | NaN                  | NaN                     |
| CAAAACGTGAGGCGCTGCTAT    | NaN                  | NaN                     |
| CATAAAGTAGAAAGCACTAC     | NaN                  | NaN                     |
| CCATAAAGTAGAAAGC         | NaN                  | NaN                     |
| CCCACCCAGGGACGCC         | NaN                  | NaN                     |
| CCCACGTTGGGCGCCG         | -1.07                | NaN                     |
| CCCATAAAGTAGAAAGCACC     | NaN                  | NaN                     |
| CCCATAAAGTAGAAAGCACT     | NaN                  | NaN                     |
| CCCCACCGCTGCCACC         | NaN                  | NaN                     |
| CCCCACTCCTGGTACC         | NaN                  | NaN                     |
| CCCCAGCATCTCCACC         | NaN                  | NaN                     |
| CCCCGGCATCTCCACC         | NaN                  | NaN                     |
| CCCCGGCATCTCCACT         | NaN                  | NaN                     |
| CCCCGGGGAGCCCGGCGGGC     | NaN                  | NaN                     |
| CCCCGTCCGTGCCTCC         | NaN                  | NaN                     |
| CCCGGACGAGCCCCC          | NaN                  | NaN                     |
| CCCGGACGAGCCCCCG         | NaN                  | NaN                     |
| CCCGGGGAGCCCGGCGGGC      | NaN                  | NaN                     |
| CCTCTTTACAGTGACC         | -0.86                | NaN                     |
| CGCTCTTCCGATCTCCG        | NaN                  | NaN                     |
| CTATACAACCTACTGCCTTCCT   | NaN                  | NaN                     |
| CTATACAATCTACTGTCTTTCT   | NaN                  | NaN                     |
| CTCCCACTGCTTCACTTGACT    | NaN                  | NaN                     |

|    |                           |       |       |
|----|---------------------------|-------|-------|
| 1  |                           |       |       |
| 2  | CTCCTACATATTAGCATTAAC     | NaN   | NaN   |
| 3  | CTGAGGTAGTAGGTTGTATAGTT   | NaN   | NaN   |
| 4  | CTTTCAGTCGGATGTTTACACT    | NaN   | NaN   |
| 5  | CTTTCAGTCGGATGTTTACAGC    | NaN   | 0.36  |
| 6  | CTTTCAGTCGGATGTTTACAGCG   | NaN   | NaN   |
| 7  | CTTTCAGTCGGATGTTTACAGTT   | NaN   | NaN   |
| 8  | GAAGCGGGTGCTCTTAT         | NaN   | NaN   |
| 9  | GAGGCGGGGGGCGAG           | NaN   | NaN   |
| 10 | GAGGCGGGGGGCGAGC          | NaN   | NaN   |
| 11 | GAGGCGGGGGGCGAGCC         | NaN   | NaN   |
| 12 | GAGGCGGGGGGCGAGCCC        | NaN   | NaN   |
| 13 | GATCCACCGCTGCCACC         | NaN   | NaN   |
| 14 | GCCACCCAGGGACGCC          | NaN   | NaN   |
| 15 | GCCCGCATCCTCCACC          | NaN   | NaN   |
| 16 | GGATTTTGGGATTAGG          | NaN   | NaN   |
| 17 | GGGGGGAGAGAAGGGTCG        | NaN   | NaN   |
| 18 | GGGGGGAGAGAAGGGTCGG       | NaN   | NaN   |
| 19 | GGGGTCGGCGGCGACG          | NaN   | NaN   |
| 20 | GTCCTGCCGCGGTCGCC         | NaN   | NaN   |
| 21 | GTGGCCTGTGACTTCT          | NaN   | NaN   |
| 22 | GTGGCCTGTGACTTTC          | NaN   | NaN   |
| 23 | GTGGGGGAGAGGCTGT          | 0.87  | NaN   |
| 24 | TAATCATATTTACCAACC        | -0.9  | NaN   |
| 25 | TCCCACTGCTTCACTTGAC       | NaN   | NaN   |
| 26 | TCCCACTGCTTCACTTGACT      | NaN   | NaN   |
| 27 | TCCCCAGCATCTCCACC         | NaN   | NaN   |
| 28 | TCCCGGCCAACGCACC          | NaN   | NaN   |
| 29 | TCCCGGCCAATGCACC          | NaN   | NaN   |
| 30 | TCCCGGCCCATGCACC          | NaN   | NaN   |
| 31 | TCCCGGGCGGCGCACC          | NaN   | NaN   |
| 32 | TCCGAGTCACGGCACC          | -0.81 | NaN   |
| 33 | TCCGGGTGCCCCCTCC          | NaN   | NaN   |
| 34 | TCCTCGCTGGGGCCTCC         | NaN   | NaN   |
| 35 | TCTCACACAGAAATCGCACCC     | -0.45 | NaN   |
| 36 | TCTCACACAGAAATCGCACCCGTC  | NaN   | NaN   |
| 37 | TCTCACACAGAAATCGCACCCGTCT | NaN   | NaN   |
| 38 | TCTCATAGTCCTAGCC          | NaN   | -0.94 |
| 39 | TCTCGGTGGAACCTCC          | NaN   | NaN   |
| 40 | TGAGAACTGAATTCCATGGG      | NaN   | NaN   |
| 41 | TGAGAACTGAATTCCATGGGC     | NaN   | NaN   |
| 42 | TGAGAACTGAATTCCATGGGCT    | NaN   | NaN   |
| 43 | TGAGAACTGAATTCCATGGGT     | NaN   | NaN   |
| 44 | TGAGAACTGAATTCCATGGGTC    | NaN   | NaN   |
| 45 | TGAGAACTGAATTCCATGGGTT    | NaN   | NaN   |
| 46 | TGAGAACTGAATTCCATGGGTTG   | NaN   | NaN   |
| 47 | TGAGGGGCAGAGAGCGAGACC     | NaN   | -0.76 |
| 48 | TGAGGGGCAGAGAGCGAGACT     | NaN   | NaN   |
| 49 | TGAGGGGCAGAGAGCGAGACTGT   | NaN   | NaN   |
| 50 | TGAGGGGCAGAGAGCGAGACTTC   | NaN   | -0.73 |
| 51 | TGAGGGGCAGAGAGCGAGACTTT   | NaN   | -0.83 |

|    |                             |       |       |
|----|-----------------------------|-------|-------|
| 1  |                             |       |       |
| 2  | TGAGGTAGGAGGTTGTATAG        | NaN   | NaN   |
| 3  | TGAGGTAGGAGGTTGTATAGC       | NaN   | -0.75 |
| 4  | TGAGGTAGGAGGTTGTATAGCT      | NaN   | -1.18 |
| 5  | TGAGGTAGGAGGTTGTATAGT       | NaN   | -1.1  |
| 6  | TGAGGTAGGAGGTTGTATAGTC      | NaN   | -1.12 |
| 7  | TGAGGTAGGAGGTTGTATAGTT      | NaN   | -1.19 |
| 8  | TGAGGTAGTAGATTGTATAGC       | -0.31 | NaN   |
| 9  | TGAGGTAGTAGATTGTATAGCC      | NaN   | NaN   |
| 10 | TGAGGTAGTAGATTGTATAGCT      | -0.34 | NaN   |
| 11 | TGAGGTAGTAGATTGTATAGT       | -0.31 | NaN   |
| 12 | TGAGGTAGTAGGTTGTAT          | NaN   | NaN   |
| 13 | TGAGGTAGTAGGTTGTATAG        | NaN   | NaN   |
| 14 | TGAGGTAGTAGGTTGTATAGAT      | NaN   | NaN   |
| 15 | TGAGGTAGTAGGTTGTATAGT       | NaN   | -0.24 |
| 16 | TGAGGTAGTAGGTTGTATAGTT      | NaN   | -0.29 |
| 17 | TGAGGTAGTAGGTTGTATAGTTAAAAG | NaN   | -0.64 |
| 18 | TGAGGTAGTAGGTTGTATAGTTT     | NaN   | -0.37 |
| 19 | TGAGGTAGTAGGTTGTGT          | NaN   | -0.82 |
| 20 | TGAGGTAGTAGGTTGTGTAG        | NaN   | -0.84 |
| 21 | TGAGGTAGTAGGTTGTGTG         | NaN   | -0.88 |
| 22 | TGAGGTAGTAGGTTGTGTGAT       | NaN   | -0.95 |
| 23 | TGAGGTAGTAGGTTGTGTGC        | NaN   | NaN   |
| 24 | TGAGGTAGTAGGTTGTGTGCT       | NaN   | NaN   |
| 25 | TGAGGTAGTAGGTTGTGTGG        | NaN   | -0.88 |
| 26 | TGAGGTAGTAGGTTGTGTGGAC      | NaN   | NaN   |
| 27 | TGAGGTAGTAGGTTGTGTGGAT      | NaN   | -0.89 |
| 28 | TGAGGTAGTAGGTTGTGTGGC       | NaN   | -0.87 |
| 29 | TGAGGTAGTAGGTTGTGTGGCC      | NaN   | -0.6  |
| 30 | TGAGGTAGTAGGTTGTGTGGCG      | NaN   | NaN   |
| 31 | TGAGGTAGTAGGTTGTGTGGCT      | NaN   | -0.98 |
| 32 | TGAGGTAGTAGGTTGTGTGGG       | NaN   | -0.96 |
| 33 | TGAGGTAGTAGGTTGTGTGGGC      | NaN   | -0.66 |
| 34 | TGAGGTAGTAGGTTGTGTGGGT      | NaN   | -0.78 |
| 35 | TGAGGTAGTAGGTTGTGTGGT       | NaN   | -0.9  |
| 36 | TGAGGTAGTAGGTTGTGTGGTAC     | NaN   | NaN   |
| 37 | TGAGGTAGTAGGTTGTGTGGTAG     | NaN   | -0.95 |
| 38 | TGAGGTAGTAGGTTGTGTGGTAT     | NaN   | -1.03 |
| 39 | TGAGGTAGTAGGTTGTGTGGTC      | NaN   | -0.89 |
| 40 | TGAGGTAGTAGGTTGTGTGGTCC     | NaN   | -0.81 |
| 41 | TGAGGTAGTAGGTTGTGTGGTCG     | NaN   | NaN   |
| 42 | TGAGGTAGTAGGTTGTGTGGTCT     | NaN   | -1.1  |
| 43 | TGAGGTAGTAGGTTGTGTGGTG      | NaN   | -0.82 |
| 44 | TGAGGTAGTAGGTTGTGTGGTGT     | NaN   | NaN   |
| 45 | TGAGGTAGTAGGTTGTGTGGTT      | NaN   | -0.94 |
| 46 | TGAGGTAGTAGGTTGTGTGGTTAAAAG | NaN   | -0.93 |
| 47 | TGAGGTAGTAGGTTGTGTGGTTAAAG  | NaN   | -1.02 |
| 48 | TGAGGTAGTAGGTTGTGTGGTTAAAT  | NaN   | -1.09 |
| 49 | TGAGGTAGTAGGTTGTGTGGTTAAC   | NaN   | NaN   |
| 50 | TGAGGTAGTAGGTTGTGTGGTTAAG   | NaN   | -1.15 |
| 51 | TGAGGTAGTAGGTTGTGTGGTTAAT   | NaN   | -1.17 |

|    |                           |     |       |
|----|---------------------------|-----|-------|
| 1  |                           |     |       |
| 2  | TGAGGTAGTAGGTTGTGTGGTTAC  | NaN | -0.76 |
| 3  | TGAGGTAGTAGGTTGTGTGGTTAG  | NaN | -1.01 |
| 4  | TGAGGTAGTAGGTTGTGTGGTTAT  | NaN | -0.98 |
| 5  | TGAGGTAGTAGGTTGTGTGGTTATG | NaN | -0.99 |
| 6  | TGAGGTAGTAGGTTGTGTGGTTATT | NaN | -1.02 |
| 7  | TGAGGTAGTAGGTTGTGTGGTTTC  | NaN | -1    |
| 8  | TGAGGTAGTAGGTTGTGTGGTTCT  | NaN | -0.98 |
| 9  | TGAGGTAGTAGGTTGTGTGGTTG   | NaN | -1.09 |
| 10 | TGAGGTAGTAGGTTGTGTGGTTGT  | NaN | -0.9  |
| 11 | TGAGGTAGTAGGTTGTGTGGTTT   | NaN | -1.05 |
| 12 | TGAGGTAGTAGGTTGTGTGGTTAAT | NaN | -1.32 |
| 13 | TGAGGTAGTAGGTTGTGTGGTTTAC | NaN | NaN   |
| 14 | TGAGGTAGTAGGTTGTGTGGTTTAG | NaN | -0.98 |
| 15 | TGAGGTAGTAGGTTGTGTGGTTTAT | NaN | -1.16 |
| 16 | TGAGGTAGTAGGTTGTGTGGTTTC  | NaN | -0.78 |
| 17 | TGAGGTAGTAGGTTGTGTGGTTTG  | NaN | -1.18 |
| 18 | TGAGGTAGTAGGTTGTGTGGTTT   | NaN | -1.13 |
| 19 | TGAGGTAGTAGGTTGTGTGGTTTT  | NaN | NaN   |
| 20 | TGAGGTAGTAGGTTGTGTGGTTTTT | NaN | NaN   |
| 21 | TGAGGTAGTAGTTTGTACAGTT    | NaN | -0.39 |
| 22 | TGAGGTAGTAGTTTGTACAGTT    | NaN | -0.39 |
| 23 | TGAGGTAGTAGTTTGTACAGTT    | NaN | -0.39 |
| 24 | TGAGGTAGTAGTTTGTACAGTT    | NaN | -0.39 |
| 25 | TGAGGTAGTAGTTTGTACAGTT    | NaN | -0.39 |
| 26 | TGAGGTAGTAGTTTGTACAGTT    | NaN | -0.39 |
| 27 | TGAGGTAGTAGTTTGTACAGTT    | NaN | -0.39 |
| 28 | TGAGGTAGTAGTTTGTACAGTT    | NaN | -0.39 |
| 29 | TGAGGTAGTAGTTTGTACAGTT    | NaN | -0.39 |
| 30 | TGAGGTAGTAGTTTGTACAGTT    | NaN | -0.39 |
| 31 | TGAGGTAGTAGTTTGTACAGTT    | NaN | -0.39 |
| 32 | TGAGGTAGTAGTTTGTACAGTT    | NaN | -0.39 |
| 33 | TGAGGTAGTAGTTTGTACAGTT    | NaN | -0.39 |
| 34 | TGAGGTAGTAGTTTGTACAGTT    | NaN | -0.39 |
| 35 | TGAGGTAGTAGTTTGTACAGTT    | NaN | -0.39 |
| 36 | TGAGGTAGTAGTTTGTACAGTT    | NaN | -0.39 |
| 37 | TGAGGTAGTAGTTTGTACAGTT    | NaN | -0.39 |
| 38 | TGAGGTAGTAGTTTGTACAGTT    | NaN | -0.39 |
| 39 | TGAGGTAGTAGTTTGTACAGTT    | NaN | -0.39 |
| 40 | TGAGGTAGTAGTTTGTACAGTT    | NaN | -0.39 |
| 41 | TGAGGTAGTAGTTTGTACAGTT    | NaN | -0.39 |
| 42 | TGAGGTAGTAGTTTGTACAGTT    | NaN | -0.39 |
| 43 | TGAGGTAGTAGTTTGTACAGTT    | NaN | -0.39 |
| 44 | TGAGGTAGTAGTTTGTACAGTT    | NaN | -0.39 |
| 45 | TGAGGTAGTAGTTTGTACAGTT    | NaN | -0.39 |
| 46 | TGAGGTAGTAGTTTGTACAGTT    | NaN | -0.39 |
| 47 | TGAGGTAGTAGTTTGTACAGTT    | NaN | -0.39 |
| 48 | TGAGGTAGTAGTTTGTACAGTT    | NaN | -0.39 |
| 49 | TGAGGTAGTAGTTTGTACAGTT    | NaN | -0.39 |
| 50 | TGAGGTAGTAGTTTGTACAGTT    | NaN | -0.39 |
| 51 | TGAGGTAGTAGTTTGTACAGTT    | NaN | -0.39 |
| 52 | TGAGGTAGTAGTTTGTACAGTT    | NaN | -0.39 |
| 53 | TGAGGTAGTAGTTTGTACAGTT    | NaN | -0.39 |
| 54 | TGAGGTAGTAGTTTGTACAGTT    | NaN | -0.39 |
| 55 | TGAGGTAGTAGTTTGTACAGTT    | NaN | -0.39 |
| 56 | TGAGGTAGTAGTTTGTACAGTT    | NaN | -0.39 |
| 57 | TGAGGTAGTAGTTTGTACAGTT    | NaN | -0.39 |
| 58 | TGAGGTAGTAGTTTGTACAGTT    | NaN | -0.39 |
| 59 | TGAGGTAGTAGTTTGTACAGTT    | NaN | -0.39 |
| 60 | TGAGGTAGTAGTTTGTACAGTT    | NaN | -0.39 |

|    |                               |                               |                                  |
|----|-------------------------------|-------------------------------|----------------------------------|
| 1  |                               |                               |                                  |
| 2  | <b>log2 FC.Ctrl6h/nZnO-6h</b> | <b>log2 FC.Ctrl24h/nAg24h</b> | <b>log2 FC.Ctrl24h/nTiO2-24h</b> |
| 3  | NaN                           | NaN                           | NaN                              |
| 4  | NaN                           | NaN                           | NaN                              |
| 5  | NaN                           | NaN                           | NaN                              |
| 6  | NaN                           | NaN                           | NaN                              |
| 7  | NaN                           | NaN                           | NaN                              |
| 8  | NaN                           | NaN                           | NaN                              |
| 9  | NaN                           | NaN                           | <b>-0.61</b>                     |
| 10 | NaN                           | NaN                           | <b>-0.66</b>                     |
| 11 | NaN                           | NaN                           | NaN                              |
| 12 | NaN                           | NaN                           | NaN                              |
| 13 | NaN                           | NaN                           | NaN                              |
| 14 | NaN                           | NaN                           | NaN                              |
| 15 | NaN                           | <b>0.94</b>                   | NaN                              |
| 16 | NaN                           | <b>0.77</b>                   | <b>0.84</b>                      |
| 17 | NaN                           | NaN                           | <b>0.58</b>                      |
| 18 | NaN                           | NaN                           | <b>0.69</b>                      |
| 19 | NaN                           | NaN                           | NaN                              |
| 20 | NaN                           | NaN                           | NaN                              |
| 21 | NaN                           | <b>0.69</b>                   | NaN                              |
| 22 | NaN                           | <b>0.74</b>                   | <b>0.61</b>                      |
| 23 | NaN                           | <b>0.48</b>                   | <b>0.26</b>                      |
| 24 | NaN                           | <b>0.82</b>                   | <b>1</b>                         |
| 25 | NaN                           | <b>0.91</b>                   | <b>0.7</b>                       |
| 26 | <b>0.81</b>                   | <b>1.65</b>                   | <b>0.87</b>                      |
| 27 | <b>0.76</b>                   | <b>1.76</b>                   | <b>1.27</b>                      |
| 28 | NaN                           | NaN                           | <b>0.96</b>                      |
| 29 | NaN                           | <b>1.66</b>                   | NaN                              |
| 30 | NaN                           | NaN                           | NaN                              |
| 31 | NaN                           | NaN                           | NaN                              |
| 32 | NaN                           | NaN                           | NaN                              |
| 33 | NaN                           | <b>-1.19</b>                  | NaN                              |
| 34 | NaN                           | <b>-0.82</b>                  | NaN                              |
| 35 | NaN                           | <b>-1.35</b>                  | NaN                              |
| 36 | NaN                           | <b>-0.99</b>                  | NaN                              |
| 37 | NaN                           | NaN                           | NaN                              |
| 38 | NaN                           | NaN                           | NaN                              |
| 39 | NaN                           | NaN                           | NaN                              |
| 40 | NaN                           | <b>-0.79</b>                  | NaN                              |
| 41 | NaN                           | <b>-0.7</b>                   | NaN                              |
| 42 | NaN                           | <b>1.33</b>                   | <b>1.14</b>                      |
| 43 | NaN                           | <b>0.53</b>                   | NaN                              |
| 44 | NaN                           | <b>0.82</b>                   | <b>0.62</b>                      |
| 45 | NaN                           | <b>0.52</b>                   | NaN                              |
| 46 | NaN                           | NaN                           | NaN                              |
| 47 | NaN                           | NaN                           | <b>1.06</b>                      |
| 48 | NaN                           | NaN                           | <b>0.53</b>                      |
| 49 | NaN                           | NaN                           | <b>0.93</b>                      |
| 50 | NaN                           | <b>1.09</b>                   | NaN                              |
| 51 | NaN                           | NaN                           | <b>1.52</b>                      |
| 52 | NaN                           | NaN                           | NaN                              |
| 53 | NaN                           | <b>-0.89</b>                  | NaN                              |
| 54 | NaN                           | NaN                           | <b>0.77</b>                      |
| 55 | NaN                           | NaN                           | <b>0.76</b>                      |
| 56 | NaN                           | NaN                           | <b>0.65</b>                      |

|    |     |              |              |
|----|-----|--------------|--------------|
| 1  |     |              |              |
| 2  | NaN | <b>0.93</b>  | <b>0.86</b>  |
| 3  | NaN | NaN          | NaN          |
| 4  | NaN | <b>-0.74</b> | NaN          |
| 5  | NaN | <b>-0.38</b> | NaN          |
| 6  | NaN | <b>-0.81</b> | NaN          |
| 7  | NaN | <b>-0.57</b> | NaN          |
| 8  | NaN | <b>0.63</b>  | NaN          |
| 9  | NaN | <b>6.76</b>  | NaN          |
| 10 | NaN | <b>6.39</b>  | NaN          |
| 11 | NaN | <b>6.85</b>  | NaN          |
| 12 | NaN | <b>6.4</b>   | NaN          |
| 13 | NaN | <b>0.92</b>  | NaN          |
| 14 | NaN | NaN          | NaN          |
| 15 | NaN | NaN          | <b>0.41</b>  |
| 16 | NaN | NaN          | <b>0.62</b>  |
| 17 | NaN | <b>4.93</b>  | NaN          |
| 18 | NaN | <b>4.54</b>  | NaN          |
| 19 | NaN | <b>1.44</b>  | NaN          |
| 20 | NaN | <b>1.34</b>  | <b>0.47</b>  |
| 21 | NaN | <b>-0.9</b>  | NaN          |
| 22 | NaN | NaN          | NaN          |
| 23 | NaN | NaN          | NaN          |
| 24 | NaN | NaN          | NaN          |
| 25 | NaN | NaN          | <b>0.83</b>  |
| 26 | NaN | NaN          | <b>0.7</b>   |
| 27 | NaN | <b>0.87</b>  | <b>0.57</b>  |
| 28 | NaN | NaN          | NaN          |
| 29 | NaN | <b>0.62</b>  | <b>0.45</b>  |
| 30 | NaN | <b>0.68</b>  | <b>0.46</b>  |
| 31 | NaN | <b>0.6</b>   | <b>0.58</b>  |
| 32 | NaN | NaN          | NaN          |
| 33 | NaN | <b>-0.56</b> | NaN          |
| 34 | NaN | <b>1.08</b>  | NaN          |
| 35 | NaN | NaN          | NaN          |
| 36 | NaN | <b>-0.41</b> | NaN          |
| 37 | NaN | <b>-0.6</b>  | NaN          |
| 38 | NaN | NaN          | <b>-0.6</b>  |
| 39 | NaN | <b>0.66</b>  | NaN          |
| 40 | NaN | <b>0.49</b>  | NaN          |
| 41 | NaN | <b>0.66</b>  | NaN          |
| 42 | NaN | <b>0.75</b>  | NaN          |
| 43 | NaN | <b>0.55</b>  | NaN          |
| 44 | NaN | <b>0.85</b>  | NaN          |
| 45 | NaN | <b>0.55</b>  | NaN          |
| 46 | NaN | NaN          | NaN          |
| 47 | NaN | NaN          | <b>-1.13</b> |
| 48 | NaN | NaN          | <b>-1.06</b> |
| 49 | NaN | NaN          | <b>-1.02</b> |
| 50 | NaN | NaN          | <b>-1.07</b> |
| 51 | NaN | NaN          | <b>-1</b>    |
| 52 | NaN | NaN          |              |
| 53 | NaN | NaN          |              |
| 54 | NaN | NaN          |              |
| 55 | NaN | NaN          |              |
| 56 | NaN | NaN          |              |
| 57 | NaN | NaN          |              |
| 58 | NaN | NaN          |              |
| 59 | NaN | NaN          |              |
| 60 | NaN | NaN          |              |

|    |     |              |              |
|----|-----|--------------|--------------|
| 1  |     |              |              |
| 2  | NaN | NaN          | <b>-1.28</b> |
| 3  | NaN | NaN          | <b>-1.39</b> |
| 4  | NaN | NaN          | <b>-0.89</b> |
| 5  | NaN | NaN          | <b>-1.04</b> |
| 6  | NaN | NaN          | <b>-1.16</b> |
| 7  | NaN | NaN          | <b>-1.3</b>  |
| 8  | NaN | NaN          | NaN          |
| 9  | NaN | NaN          | NaN          |
| 10 | NaN | <b>-0.35</b> | NaN          |
| 11 | NaN | NaN          | NaN          |
| 12 | NaN | NaN          | NaN          |
| 13 | NaN | NaN          | NaN          |
| 14 | NaN | <b>-0.43</b> | NaN          |
| 15 | NaN | NaN          | NaN          |
| 16 | NaN | <b>-0.4</b>  | NaN          |
| 17 | NaN | NaN          | <b>-0.23</b> |
| 18 | NaN | NaN          | NaN          |
| 19 | NaN | NaN          | NaN          |
| 20 | NaN | NaN          | NaN          |
| 21 | NaN | NaN          | NaN          |
| 22 | NaN | NaN          | NaN          |
| 23 | NaN | NaN          | <b>-0.85</b> |
| 24 | NaN | NaN          | <b>-1.06</b> |
| 25 | NaN | NaN          | <b>-0.99</b> |
| 26 | NaN | NaN          | <b>-0.95</b> |
| 27 | NaN | NaN          | <b>-1.05</b> |
| 28 | NaN | NaN          | <b>-1.05</b> |
| 29 | NaN | NaN          | <b>-0.97</b> |
| 30 | NaN | NaN          | <b>-0.79</b> |
| 31 | NaN | NaN          | <b>-0.92</b> |
| 32 | NaN | NaN          | <b>-1.08</b> |
| 33 | NaN | NaN          | <b>-1.06</b> |
| 34 | NaN | NaN          | <b>-1.04</b> |
| 35 | NaN | NaN          | <b>-1.17</b> |
| 36 | NaN | NaN          | <b>-0.97</b> |
| 37 | NaN | NaN          | <b>-1.06</b> |
| 38 | NaN | NaN          | <b>-1.01</b> |
| 39 | NaN | NaN          | <b>-1.49</b> |
| 40 | NaN | NaN          | <b>-1.4</b>  |
| 41 | NaN | NaN          | <b>-0.89</b> |
| 42 | NaN | NaN          | <b>-1.05</b> |
| 43 | NaN | NaN          | <b>-1.03</b> |
| 44 | NaN | NaN          | <b>-1.28</b> |
| 45 | NaN | NaN          | <b>-1.08</b> |
| 46 | NaN | NaN          | <b>-0.93</b> |
| 47 | NaN | NaN          | <b>-0.95</b> |
| 48 | NaN | NaN          | <b>-1.13</b> |
| 49 | NaN | NaN          | NaN          |
| 50 | NaN | NaN          | <b>-0.8</b>  |
| 51 | NaN | NaN          | <b>-0.82</b> |
| 52 | NaN | NaN          | <b>-1.04</b> |
| 53 | NaN | NaN          | <b>-1.09</b> |
| 54 | NaN | NaN          | <b>-0.96</b> |
| 55 | NaN | NaN          |              |
| 56 | NaN | NaN          |              |
| 57 | NaN | NaN          |              |
| 58 | NaN | NaN          |              |
| 59 | NaN | NaN          |              |
| 60 | NaN | NaN          |              |



|    |     |       |       |
|----|-----|-------|-------|
| 1  |     |       |       |
| 2  | NaN | NaN   | -0.76 |
| 3  | NaN | NaN   | -1.24 |
| 4  | NaN | NaN   | -1.11 |
| 5  | NaN | NaN   | -1.17 |
| 6  | NaN | NaN   | -0.96 |
| 7  | NaN | NaN   | -1.02 |
| 8  | NaN | NaN   | -1.06 |
| 9  | NaN | NaN   | -1.18 |
| 10 | NaN | NaN   | -0.8  |
| 11 | NaN | NaN   | -1.16 |
| 12 | NaN | NaN   | -1    |
| 13 | NaN | NaN   | -0.82 |
| 14 | NaN | NaN   | -1.13 |
| 15 | NaN | NaN   | -1.08 |
| 16 | NaN | NaN   | -1.07 |
| 17 | NaN | NaN   | -1.04 |
| 18 | NaN | NaN   | -1.02 |
| 19 | NaN | NaN   | -1.05 |
| 20 | NaN | NaN   | NaN   |
| 21 | NaN | 1.15  | 0.75  |
| 22 | NaN | NaN   | 0.53  |
| 23 | NaN | 0.94  | NaN   |
| 24 | NaN | NaN   | NaN   |
| 25 | NaN | -0.46 | NaN   |
| 26 | NaN | -0.56 | NaN   |
| 27 |     |       |       |
| 28 |     |       |       |
| 29 |     |       |       |
| 30 |     |       |       |
| 31 |     |       |       |
| 32 |     |       |       |
| 33 |     |       |       |
| 34 |     |       |       |
| 35 |     |       |       |
| 36 |     |       |       |
| 37 |     |       |       |
| 38 |     |       |       |
| 39 |     |       |       |
| 40 |     |       |       |
| 41 |     |       |       |
| 42 |     |       |       |
| 43 |     |       |       |
| 44 |     |       |       |
| 45 |     |       |       |
| 46 |     |       |       |
| 47 |     |       |       |
| 48 |     |       |       |
| 49 |     |       |       |
| 50 |     |       |       |
| 51 |     |       |       |
| 52 |     |       |       |
| 53 |     |       |       |
| 54 |     |       |       |
| 55 |     |       |       |
| 56 |     |       |       |
| 57 |     |       |       |
| 58 |     |       |       |
| 59 |     |       |       |
| 60 |     |       |       |

|    | log2 FC.Ctrl24h/nZnO-24h | Annotation: isomiR   | Annotation: miRNA |
|----|--------------------------|----------------------|-------------------|
| 1  |                          |                      |                   |
| 2  |                          |                      |                   |
| 3  | NaN                      | hsa-miR-1303         |                   |
| 4  | NaN                      | hsa-miR-1303         |                   |
| 5  | NaN                      | hsa-miR-1303         |                   |
| 6  | NaN                      | hsa-miR-4284.SNPC    |                   |
| 7  | NaN                      | hsa-miR-4301         |                   |
| 8  | NaN                      |                      | hsa-let-7d-5p     |
| 9  | NaN                      |                      | hsa-let-7d-5p     |
| 10 | NaN                      |                      |                   |
| 11 | NaN                      | hsa-miR-1303         |                   |
| 12 | NaN                      | hsa-miR-1303         |                   |
| 13 | NaN                      | hsa-miR-1303         |                   |
| 14 | NaN                      |                      | hsa-miR-374b-5p   |
| 15 | NaN                      | hsa-miR-374b-5p      |                   |
| 16 | NaN                      |                      | hsa-miR-374b-5p   |
| 17 | NaN                      | hsa-miR-23b-3p       |                   |
| 18 | NaN                      | hsa-miR-5007-3p      |                   |
| 19 | NaN                      |                      | hsa-miR-1260b     |
| 20 | NaN                      | hsa-miR-4695-3p      |                   |
| 21 | NaN                      | hsa-miR-1260b        |                   |
| 22 | 0.39                     | hsa-miR-1260a        |                   |
| 23 | NaN                      | hsa-miR-3692-5p      |                   |
| 24 | 0.68                     | hsa-miR-5100         |                   |
| 25 | 1.26                     | hsa-miR-5100         |                   |
| 26 | 1.65                     | hsa-miR-4746-5p      |                   |
| 27 | NaN                      | hsa-miR-4776-5p      |                   |
| 28 | 1.02                     | hsa-miR-4482-3p      |                   |
| 29 | NaN                      | hsa-miR-4482-3p      |                   |
| 30 | NaN                      |                      | hsa-miR-424-3p    |
| 31 | NaN                      |                      | hsa-miR-424-3p    |
| 32 | NaN                      |                      | hsa-miR-142-5p    |
| 33 | NaN                      |                      | hsa-miR-142-5p    |
| 34 | NaN                      | hsa-miR-4642         |                   |
| 35 | 0.75                     | hsa-miR-2277-3p.SNPC |                   |
| 36 | NaN                      | hsa-miR-142-5p       |                   |
| 37 | NaN                      |                      | hsa-miR-142-5p    |
| 38 | NaN                      | hsa-miR-1260a        |                   |
| 39 | 1.06                     |                      | hsa-miR-4286      |
| 40 | NaN                      | hsa-miR-4784         |                   |
| 41 | NaN                      | hsa-miR-4784         |                   |
| 42 | 0.42                     | hsa-miR-4304         |                   |
| 43 | 0.76                     | hsa-miR-4532         |                   |
| 44 | NaN                      | hsa-miR-663b         |                   |
| 45 | 0.45                     | hsa-miR-3178         |                   |
| 46 | NaN                      | hsa-miR-3178         |                   |
| 47 | NaN                      | hsa-miR-4532         |                   |
| 48 | NaN                      | hsa-miR-597-5p.SNPA  |                   |
| 49 | NaN                      | hsa-miR-4683         |                   |
| 50 | NaN                      | hsa-let-7b-3p        |                   |
| 51 | NaN                      | hsa-let-7a-3p        |                   |
| 52 | NaN                      | hsa-miR-4301         |                   |
| 53 | NaN                      |                      |                   |
| 54 | NaN                      |                      |                   |
| 55 | NaN                      |                      |                   |
| 56 | NaN                      |                      |                   |
| 57 | NaN                      |                      |                   |
| 58 | NaN                      |                      |                   |
| 59 | NaN                      |                      |                   |
| 60 | NaN                      |                      |                   |

|    |              |                     |                 |
|----|--------------|---------------------|-----------------|
| 1  |              |                     |                 |
| 2  | NaN          |                     | hsa-miR-155-3p  |
| 3  | <b>-0.99</b> | hsa-let-7b-5p       |                 |
| 4  | NaN          | hsa-miR-30a-3p      |                 |
| 5  | NaN          |                     | hsa-miR-30e-3p  |
| 6  | NaN          |                     | hsa-miR-30e-3p  |
| 7  | NaN          |                     |                 |
| 8  | NaN          | hsa-miR-30a-3p      |                 |
| 9  | NaN          | hsa-miR-758-5p      |                 |
| 10 | NaN          |                     | hsa-miR-6087    |
| 11 | NaN          |                     | hsa-miR-6087    |
| 12 | NaN          |                     | hsa-miR-6087    |
| 13 | NaN          |                     | hsa-miR-6087    |
| 14 | NaN          |                     | hsa-miR-6087    |
| 15 | NaN          | hsa-miR-1260b       |                 |
| 16 | <b>0.88</b>  | hsa-miR-501-5p      |                 |
| 17 | NaN          | hsa-miR-6894-3p     |                 |
| 18 | NaN          | hsa-miR-548ba       |                 |
| 19 | NaN          | hsa-miR-6797-3p     |                 |
| 20 | NaN          | hsa-miR-6797-3p     |                 |
| 21 | NaN          |                     |                 |
| 22 | NaN          |                     | hsa-miR-7704    |
| 23 | <b>0.7</b>   | hsa-miR-6872-3p     |                 |
| 24 | NaN          | hsa-miR-330-5p      |                 |
| 25 | NaN          | hsa-miR-3176        |                 |
| 26 | <b>-1</b>    |                     |                 |
| 27 | NaN          |                     | hsa-miR-1275    |
| 28 | NaN          | hsa-miR-5007-3p     |                 |
| 29 | NaN          | hsa-miR-4301        |                 |
| 30 | NaN          | hsa-miR-4301        |                 |
| 31 | NaN          | hsa-miR-6807-5p     |                 |
| 32 | <b>0.71</b>  | hsa-miR-7977        |                 |
| 33 | <b>0.69</b>  | hsa-miR-7977        |                 |
| 34 | <b>0.71</b>  | hsa-miR-7977        |                 |
| 35 | <b>0.57</b>  | hsa-miR-1909-3p     |                 |
| 36 | <b>0.56</b>  | hsa-miR-1199-5p     |                 |
| 37 | NaN          |                     | hsa-miR-4454    |
| 38 | NaN          |                     |                 |
| 39 | <b>-0.67</b> | hsa-miR-6069        |                 |
| 40 | NaN          | hsa-miR-593-5p.SNPC |                 |
| 41 | NaN          |                     | hsa-miR-342-3p  |
| 42 | NaN          |                     | hsa-miR-342-3p  |
| 43 | NaN          | hsa-miR-342-3p      |                 |
| 44 | NaN          | hsa-miR-7844-5p     |                 |
| 45 | NaN          | hsa-miR-4661-5p     |                 |
| 46 | <b>0.68</b>  |                     |                 |
| 47 | NaN          |                     | hsa-miR-146a-5p |
| 48 | NaN          | hsa-miR-146b-5p     |                 |
| 49 | NaN          | hsa-miR-146b-5p     |                 |
| 50 | NaN          |                     | hsa-miR-146a-5p |
| 51 | NaN          |                     | hsa-miR-146a-5p |
| 52 | <b>0.7</b>   | hsa-miR-146b-5p     |                 |
| 53 | NaN          |                     | hsa-miR-146a-5p |
| 54 | <b>0.68</b>  |                     | hsa-miR-146a-5p |
| 55 | NaN          | hsa-miR-423-5p      |                 |
| 56 | NaN          |                     | hsa-miR-423-5p  |
| 57 | NaN          | hsa-miR-423-5p      |                 |
| 58 | NaN          | hsa-miR-423-5p      |                 |
| 59 | NaN          |                     | hsa-miR-423-5p  |
| 60 | NaN          |                     |                 |

|    |       |               |               |
|----|-------|---------------|---------------|
| 1  |       |               |               |
| 2  | NaN   |               | hsa-let-7e-5p |
| 3  | NaN   | hsa-let-7e-5p |               |
| 4  | NaN   | hsa-let-7e-5p |               |
| 5  | NaN   |               | hsa-let-7e-5p |
| 6  | NaN   | hsa-let-7e-5p |               |
| 7  | NaN   |               | hsa-let-7e-5p |
| 8  | NaN   |               | hsa-let-7e-5p |
| 9  | NaN   | hsa-let-7f-5p |               |
| 10 | NaN   | hsa-let-7f-5p |               |
| 11 | NaN   | hsa-let-7f-5p |               |
| 12 | NaN   |               | hsa-let-7f-5p |
| 13 | NaN   |               | hsa-let-7a-5p |
| 14 | -0.42 |               | hsa-let-7a-5p |
| 15 | -0.29 |               | hsa-let-7a-5p |
| 16 | NaN   | hsa-let-7b-5p |               |
| 17 | -0.24 |               | hsa-let-7a-5p |
| 18 | NaN   |               | hsa-let-7a-5p |
| 19 | NaN   |               | hsa-let-7a-5p |
| 20 | NaN   | hsa-let-7a-5p |               |
| 21 | NaN   |               | hsa-let-7a-5p |
| 22 | NaN   |               | hsa-let-7b-5p |
| 23 | NaN   | hsa-let-7c-5p |               |
| 24 | NaN   |               | hsa-let-7b-5p |
| 25 | NaN   |               | hsa-let-7b-5p |
| 26 | NaN   | hsa-let-7a-5p |               |
| 27 | NaN   | hsa-let-7c-5p |               |
| 28 | NaN   | hsa-let-7a-5p |               |
| 29 | NaN   |               | hsa-let-7b-5p |
| 30 | NaN   |               | hsa-let-7b-5p |
| 31 | NaN   | hsa-let-7a-5p |               |
| 32 | NaN   | hsa-let-7a-5p |               |
| 33 | NaN   | hsa-let-7a-5p |               |
| 34 | NaN   | hsa-let-7a-5p |               |
| 35 | NaN   | hsa-let-7a-5p |               |
| 36 | NaN   | hsa-let-7a-5p |               |
| 37 | NaN   | hsa-let-7a-5p |               |
| 38 | NaN   | hsa-let-7a-5p |               |
| 39 | NaN   | hsa-let-7a-5p |               |
| 40 | NaN   | hsa-let-7a-5p |               |
| 41 | NaN   |               | hsa-let-7b-5p |
| 42 | NaN   |               | hsa-let-7b-5p |
| 43 | NaN   | hsa-let-7a-5p |               |
| 44 | NaN   | hsa-let-7a-5p |               |
| 45 | NaN   | hsa-let-7a-5p |               |
| 46 | NaN   | hsa-let-7a-5p |               |
| 47 | NaN   | hsa-let-7a-5p |               |
| 48 | NaN   | hsa-let-7a-5p |               |
| 49 | NaN   | hsa-let-7a-5p |               |
| 50 | NaN   | hsa-let-7a-5p |               |
| 51 | NaN   | hsa-let-7a-5p |               |
| 52 | NaN   | hsa-let-7a-5p |               |
| 53 | NaN   |               | hsa-let-7b-5p |
| 54 | NaN   |               | hsa-let-7b-5p |
| 55 | NaN   | hsa-let-7b-5p |               |
| 56 | NaN   | hsa-let-7c-5p |               |
| 57 | NaN   | hsa-let-7c-5p |               |
| 58 | NaN   | hsa-let-7c-5p |               |
| 59 | NaN   | hsa-let-7c-5p |               |
| 60 | NaN   | hsa-let-7c-5p |               |

|    |      |                 |                 |
|----|------|-----------------|-----------------|
| 1  |      |                 |                 |
| 2  | NaN  | hsa-let-7a-5p   |                 |
| 3  | NaN  | hsa-let-7a-5p   |                 |
| 4  | NaN  | hsa-let-7a-5p   |                 |
| 5  | NaN  | hsa-let-7c-5p   |                 |
| 6  | NaN  | hsa-let-7c-5p   |                 |
| 7  | NaN  | hsa-let-7a-5p   |                 |
| 8  | NaN  | hsa-let-7a-5p   |                 |
| 9  | NaN  | hsa-let-7a-5p   |                 |
| 10 | NaN  | hsa-let-7a-5p   |                 |
| 11 | NaN  | hsa-let-7a-5p   |                 |
| 12 |      |                 |                 |
| 13 | NaN  |                 | hsa-let-7b-5p   |
| 14 | NaN  | hsa-let-7b-5p   |                 |
| 15 | NaN  | hsa-let-7a-5p   |                 |
| 16 | NaN  | hsa-let-7a-5p   |                 |
| 17 | NaN  | hsa-let-7a-5p   |                 |
| 18 | NaN  |                 |                 |
| 19 | NaN  |                 | hsa-let-7b-5p   |
| 20 | NaN  | hsa-let-7a-5p   |                 |
| 21 | NaN  | hsa-let-7a-5p   |                 |
| 22 | NaN  | hsa-let-7a-5p   |                 |
| 23 | NaN  |                 |                 |
| 24 | NaN  |                 | hsa-let-7g-5p   |
| 25 | 1.07 | hsa-miR-6894-3p |                 |
| 26 | NaN  |                 | hsa-miR-19b-3p  |
| 27 | NaN  |                 | hsa-miR-3613-5p |
| 28 | 0.64 | hsa-miR-7977    |                 |
| 29 | NaN  |                 | hsa-miR-30e-3p  |
| 30 |      |                 |                 |
| 31 | NaN  | hsa-miR-30a-3p  |                 |
| 32 |      |                 |                 |
| 33 |      |                 |                 |
| 34 |      |                 |                 |
| 35 |      |                 |                 |
| 36 |      |                 |                 |
| 37 |      |                 |                 |
| 38 |      |                 |                 |
| 39 |      |                 |                 |
| 40 |      |                 |                 |
| 41 |      |                 |                 |
| 42 |      |                 |                 |
| 43 |      |                 |                 |
| 44 |      |                 |                 |
| 45 |      |                 |                 |
| 46 |      |                 |                 |
| 47 |      |                 |                 |
| 48 |      |                 |                 |
| 49 |      |                 |                 |
| 50 |      |                 |                 |
| 51 |      |                 |                 |
| 52 |      |                 |                 |
| 53 |      |                 |                 |
| 54 |      |                 |                 |
| 55 |      |                 |                 |
| 56 |      |                 |                 |
| 57 |      |                 |                 |
| 58 |      |                 |                 |
| 59 |      |                 |                 |
| 60 |      |                 |                 |

| Transcript ID   |
|-----------------|
| A_32_P152696    |
| ENST00000375353 |
| ENST00000380464 |
| ENST00000395807 |
| ENST00000396437 |
| ENST00000399411 |
| ENST00000402338 |
| ENST00000415536 |
| ENST00000423380 |
| ENST00000435431 |
| ENST00000439905 |
| ENST00000443593 |
| ENST00000445339 |
| ENST00000481779 |
| ENST00000507388 |
| ENST00000513626 |
| ENST00000517927 |
| ENST00000518968 |
| ENST00000519038 |
| ENST00000538790 |
| ENST00000557577 |
| ENST00000560295 |
| ENST00000561362 |
| ENST00000562272 |
| ENST00000567054 |
| ENST00000567216 |
| ENST00000567540 |
| ENST00000570137 |
| ENST00000584867 |
| ENST00000592540 |
| ENST00000592695 |
| ENST00000596510 |
| ENST00000607314 |
| ENST00000612330 |
| ENST00000612661 |
| ENST00000621947 |
| lnc-ARRDC3-1:10 |
| lnc-ARRDC3-1:6  |
| lnc-C8orf22-2:2 |
| lnc-EIF3M-2:6   |
| lnc-FKBP2-1:1   |
| lnc-FKBP2-1:2   |
| lnc-KATNAL2-4:1 |
| lnc-MSRB3-2:2   |
| lnc-PHF3-1:1    |
| lnc-PHLDB1-1:1  |
| lnc-SRY-2:1     |
| lnc-WWOX-3:1    |
| NM_000029       |

|    |              |
|----|--------------|
| 1  |              |
| 2  | NM_000057    |
| 3  | NM_000092    |
| 4  | NM_000107    |
| 5  | NM_000129    |
| 6  | NM_000135    |
| 7  | NM_000153    |
| 8  | NM_000201    |
| 9  | NM_000210    |
| 10 | NM_000210    |
| 11 | NM_000212    |
| 12 | NM_000245    |
| 13 | NM_000270    |
| 14 | NM_000309    |
| 15 | NM_000361    |
| 16 | NM_000527    |
| 17 | NM_000576    |
| 18 | NM_000578    |
| 19 | NM_000584    |
| 20 | NM_000594    |
| 21 | NM_000688    |
| 22 | NM_000698    |
| 23 | NM_000713    |
| 24 | NM_000873    |
| 25 | NM_000889    |
| 26 | NM_000946    |
| 27 | NM_000966    |
| 28 | NM_001001132 |
| 29 | NM_001001290 |
| 30 | NM_001001330 |
| 31 | NM_001001437 |
| 32 | NM_001001852 |
| 33 | NM_001001924 |
| 34 | NM_001002033 |
| 35 | NM_001002236 |
| 36 | NM_001003395 |
| 37 | NM_001005743 |
| 38 | NM_001005910 |
| 39 | NM_001008211 |
| 40 | NM_001008540 |
| 41 | NM_001009936 |
| 42 | NM_001012241 |
| 43 | NM_001012267 |
| 44 | NM_001012271 |
| 45 | NM_001013398 |
| 46 | NM_001014279 |
| 47 | NM_001017420 |
| 48 | NM_001017534 |
| 49 | NM_001018115 |
| 50 | NM_001025390 |
| 51 | NM_001031804 |
| 52 | NM_001031835 |
| 53 |              |
| 54 |              |
| 55 |              |
| 56 |              |
| 57 |              |
| 58 |              |
| 59 |              |
| 60 |              |

For Peer Review Only

1  
2 NM\_001040455  
3 NM\_001042402  
4 NM\_001042483  
5 NM\_001042550  
6 NM\_001042747  
7 NM\_001045556  
8 NM\_001067  
9 NM\_001070  
10 NM\_001080470  
11 NM\_001080534  
12 NM\_001083112  
13 NM\_001083961  
14 NM\_001093726  
15 NM\_001099  
16 NM\_001104554  
17 NM\_001122606  
18 NM\_001122674  
19 NM\_001123375  
20 NM\_001130679  
21 NM\_001131034  
22 NM\_001137610  
23 NM\_001142651  
24 NM\_001144978  
25 NM\_001145115  
26 NM\_001146  
27 NM\_001164460  
28 NM\_001164617  
29 NM\_001165  
30 NM\_001174104  
31 NM\_001190880  
32 NM\_001199042  
33 NM\_001199182  
34 NM\_001236  
35 NM\_001237  
36 NM\_001243168  
37 NM\_001256429  
38 NM\_001276687  
39 NM\_001281932  
40 NM\_001282130  
41 NM\_001286813  
42 NM\_001287426  
43 NM\_001287428  
44 NM\_001290360  
45 NM\_001293212  
46 NM\_001300919  
47 NM\_001301267  
48 NM\_001311  
49 NM\_001321  
50 NM\_001337  
51 NM\_001423



|    |           |
|----|-----------|
| 1  |           |
| 2  | NM_001448 |
| 3  | NM_001504 |
| 4  | NM_001512 |
| 5  | NM_001561 |
| 6  | NM_001570 |
| 7  | NM_001621 |
| 8  | NM_001657 |
| 9  | NM_001753 |
| 10 | NM_001769 |
| 11 | NM_001770 |
| 12 | NM_001781 |
| 13 | NM_001786 |
| 14 | NM_001809 |
| 15 | NM_001813 |
| 16 | NM_001826 |
| 17 | NM_001831 |
| 18 | NM_001838 |
| 19 | NM_001860 |
| 20 | NM_001955 |
| 21 | NM_001957 |
| 22 | NM_001964 |
| 23 | NM_001979 |
| 24 | NM_001993 |
| 25 | NM_002000 |
| 26 | NM_002029 |
| 27 | NM_002133 |
| 28 | NM_002155 |
| 29 | NM_002183 |
| 30 | NM_002185 |
| 31 | NM_002192 |
| 32 | NM_002210 |
| 33 | NM_002259 |
| 34 | NM_002263 |
| 35 | NM_002359 |
| 36 | NM_002364 |
| 37 | NM_002395 |
| 38 | NM_002417 |
| 39 | NM_002421 |
| 40 | NM_002425 |
| 41 | NM_002426 |
| 42 | NM_002429 |
| 43 | NM_002436 |
| 44 | NM_002567 |
| 45 | NM_002575 |
| 46 | NM_002587 |
| 47 | NM_002607 |
| 48 | NM_002648 |
| 49 | NM_002758 |
| 50 | NM_002852 |
| 51 | NM_002923 |
| 52 |           |
| 53 |           |
| 54 |           |
| 55 |           |
| 56 |           |
| 57 |           |
| 58 |           |
| 59 |           |
| 60 |           |

For Peer Review Only

1  
2 NM\_002928  
3 NM\_002947  
4 NM\_002964  
5 NM\_002983  
6 NM\_003258  
7 NM\_003311  
8 NM\_003318  
9 NM\_003389  
10 NM\_003483  
11 NM\_003485  
12 NM\_003505  
13 NM\_003517  
14 NM\_003537  
15 NM\_003579  
16 NM\_003596  
17 NM\_003609  
18 NM\_003612  
19 NM\_003670  
20 NM\_003686  
21 NM\_003782  
22 NM\_003786  
23 NM\_003793  
24 NM\_003840  
25 NM\_003878  
26 NM\_003890  
27 NM\_003897  
28 NM\_003900  
29 NM\_003904  
30 NM\_003950  
31 NM\_003981  
32 NM\_003986  
33 NM\_004049  
34 NM\_004073  
35 NM\_004083  
36 NM\_004119  
37 NM\_004126  
38 NM\_004165  
39 NM\_004169  
40 NM\_004172  
41 NM\_004199  
42 NM\_004217  
43 NM\_004219  
44 NM\_004265  
45 NM\_004267  
46 NM\_004289  
47 NM\_004336  
48 NM\_004362  
49 NM\_004398  
50 NM\_004414  
51 NM\_004418  
52  
53  
54  
55  
56  
57  
58  
59  
60

|    |           |
|----|-----------|
| 1  |           |
| 2  | NM_004419 |
| 3  | NM_004460 |
| 4  | NM_004495 |
| 5  | NM_004523 |
| 6  | NM_004528 |
| 7  | NM_004591 |
| 8  | NM_004598 |
| 9  | NM_004603 |
| 10 | NM_004644 |
| 11 | NM_004701 |
| 12 | NM_004750 |
| 13 | NM_004776 |
| 14 | NM_004900 |
| 15 | NM_004997 |
| 16 | NM_005178 |
| 17 | NM_005184 |
| 18 | NM_005192 |
| 19 | NM_005225 |
| 20 | NM_005226 |
| 21 | NM_005231 |
| 22 | NM_005261 |
| 23 | NM_005319 |
| 24 | NM_005345 |
| 25 | NM_005346 |
| 26 | NM_005347 |
| 27 | NM_005410 |
| 28 | NM_005415 |
| 29 | NM_005429 |
| 30 | NM_005441 |
| 31 | NM_005442 |
| 32 | NM_005480 |
| 33 | NM_005484 |
| 34 | NM_005502 |
| 35 | NM_005545 |
| 36 | NM_005601 |
| 37 | NM_005621 |
| 38 | NM_005627 |
| 39 | NM_005631 |
| 40 | NM_005693 |
| 41 | NM_005729 |
| 42 | NM_005733 |
| 43 | NM_005738 |
| 44 | NM_005946 |
| 45 | NM_005947 |
| 46 | NM_005951 |
| 47 | NM_005952 |
| 48 | NM_006041 |
| 49 | NM_006045 |
| 50 | NM_006082 |
| 51 | NM_006086 |

For Peer Review Only

1  
2 NM\_006100  
3 NM\_006101  
4 NM\_006206  
5 NM\_006207  
6 NM\_006216  
7 NM\_006290  
8 NM\_006291  
9 NM\_006461  
10 NM\_006486  
11 NM\_006509  
12 NM\_006528  
13 NM\_006607  
14 NM\_006623  
15 NM\_006763  
16 NM\_006770  
17 NM\_006795  
18 NM\_006807  
19 NM\_006845  
20 NM\_007037  
21 NM\_007086  
22 NM\_007173  
23 NM\_007174  
24 NM\_007243  
25 NM\_007257  
26 NM\_007280  
27 NM\_007300  
28 NM\_007331  
29 NM\_007333  
30 NM\_012072  
31 NM\_012112  
32 NM\_012228  
33 NM\_012263  
34 NM\_012291  
35 NM\_012310  
36 NM\_012323  
37 NM\_012328  
38 NM\_012413  
39 NM\_012415  
40 NM\_012449  
41 NM\_012484  
42 NM\_013290  
43 NM\_013296  
44 NM\_013305  
45 NM\_013376  
46 NM\_013437  
47 NM\_014149  
48 NM\_014176  
49 NM\_014214  
50 NM\_014266  
51 NM\_014288

|    |           |
|----|-----------|
| 1  |           |
| 2  | NM_014310 |
| 3  | NM_014330 |
| 4  | NM_014331 |
| 5  | NM_014350 |
| 6  | NM_014353 |
| 7  | NM_014387 |
| 8  | NM_014397 |
| 9  | NM_014430 |
| 10 | NM_014629 |
| 11 | NM_014702 |
| 12 | NM_014708 |
| 13 | NM_014736 |
| 14 | NM_014737 |
| 15 | NM_014749 |
| 16 | NM_014750 |
| 17 | NM_014766 |
| 18 | NM_014788 |
| 19 | NM_014791 |
| 20 | NM_014875 |
| 21 | NM_015190 |
| 22 | NM_015193 |
| 23 | NM_015271 |
| 24 | NM_015350 |
| 25 | NM_015364 |
| 26 | NM_015415 |
| 27 | NM_015444 |
| 28 | NM_015461 |
| 29 | NM_015577 |
| 30 | NM_015651 |
| 31 | NM_015653 |
| 32 | NM_015912 |
| 33 | NM_015991 |
| 34 | NM_016100 |
| 35 | NM_016108 |
| 36 | NM_016112 |
| 37 | NM_016229 |
| 38 | NM_016297 |
| 39 | NM_016343 |
| 40 | NM_016359 |
| 41 | NM_016426 |
| 42 | NM_016428 |
| 43 | NM_016448 |
| 44 | NM_016639 |
| 45 | NM_016929 |
| 46 | NM_016937 |
| 47 | NM_017669 |
| 48 | NM_017709 |
| 49 | NM_017779 |
| 50 | NM_017789 |
| 51 | NM_017885 |

For Peer Review Only

1  
2 NM\_017915  
3 NM\_018101  
4 NM\_018131  
5 NM\_018136  
6 NM\_018176  
7 NM\_018192  
8 NM\_018241  
9 NM\_018304  
10 NM\_018410  
11 NM\_018418  
12 NM\_018490  
13 NM\_018492  
14 NM\_018584  
15 NM\_018689  
16 NM\_018712  
17 NM\_018719  
18 NM\_018837  
19 NM\_018945  
20 NM\_018975  
21 NM\_018988  
22 NM\_018993  
23 NM\_019042  
24 NM\_019058  
25 NM\_020125  
26 NM\_020242  
27 NM\_020370  
28 NM\_020371  
29 NM\_020379  
30 NM\_020529  
31 NM\_020651  
32 NM\_020675  
33 NM\_020683  
34 NM\_020733  
35 NM\_020810  
36 NM\_021077  
37 NM\_021170  
38 NM\_021181  
39 NM\_021194  
40 NM\_021209  
41 NM\_021913  
42 NM\_021935  
43 NM\_021992  
44 NM\_022049  
45 NM\_022055  
46 NM\_022074  
47 NM\_022094  
48 NM\_022128  
49 NM\_022136  
50 NM\_022153  
51 NM\_022346  
52  
53  
54  
55  
56  
57  
58  
59  
60

|    |           |
|----|-----------|
| 1  |           |
| 2  | NM_022361 |
| 3  | NM_022841 |
| 4  | NM_023070 |
| 5  | NM_024021 |
| 6  | NM_024056 |
| 7  | NM_024111 |
| 8  | NM_024503 |
| 9  | NM_024524 |
| 10 | NM_024560 |
| 11 | NM_024640 |
| 12 | NM_024680 |
| 13 | NM_024745 |
| 14 | NM_024769 |
| 15 | NM_024818 |
| 16 | NM_024901 |
| 17 | NM_024927 |
| 18 | NM_024940 |
| 19 | NM_025049 |
| 20 | NM_025059 |
| 21 | NM_025074 |
| 22 | NM_025195 |
| 23 | NM_030627 |
| 24 | NM_030636 |
| 25 | NM_030641 |
| 26 | NM_030928 |
| 27 | NM_030949 |
| 28 | NM_031226 |
| 29 | NM_031299 |
| 30 | NM_031300 |
| 31 | NM_031301 |
| 32 | NM_031303 |
| 33 | NM_031966 |
| 34 | NM_032133 |
| 35 | NM_032152 |
| 36 | NM_032169 |
| 37 | NM_032208 |
| 38 | NM_032242 |
| 39 | NM_032257 |
| 40 | NM_032305 |
| 41 | NM_032333 |
| 42 | NM_032367 |
| 43 | NM_032452 |
| 44 | NM_032466 |
| 45 | NM_032501 |
| 46 | NM_032603 |
| 47 | NM_032636 |
| 48 | NM_032704 |
| 49 | NM_032717 |
| 50 | NM_032727 |
| 51 | NM_032738 |

For Peer Review Only

1  
2 NM\_032800  
3 NM\_032818  
4 NM\_032997  
5 NM\_033116  
6 NM\_033120  
7 NM\_033128  
8 NM\_033199  
9 NM\_033388  
10 NM\_033417  
11 NM\_033452  
12 NM\_033505  
13 NM\_052884  
14 NM\_052913  
15 NM\_052960  
16 NM\_053025  
17 NM\_054027  
18 NM\_054113  
19 NM\_058172  
20 NM\_058179  
21 NM\_078626  
22 NM\_080597  
23 NM\_080668  
24 NM\_080672  
25 NM\_080680  
26 NM\_080721  
27 NM\_130469  
28 NM\_130898  
29 NM\_138444  
30 NM\_138554  
31 NM\_138555  
32 NM\_138730  
33 NM\_138768  
34 NM\_138924  
35 NM\_138967  
36 NM\_139346  
37 NM\_144569  
38 NM\_144698  
39 NM\_145109  
40 NM\_145791  
41 NM\_152446  
42 NM\_152562  
43 NM\_152625  
44 NM\_152899  
45 NM\_153186  
46 NM\_153361  
47 NM\_170600  
48 NM\_170685  
49 NM\_170697  
50 NM\_172037  
51 NM\_173475  
52  
53  
54  
55  
56  
57  
58  
59  
60



|    |           |
|----|-----------|
| 1  |           |
| 2  | NM_173573 |
| 3  | NM_173633 |
| 4  | NM_173653 |
| 5  | NM_173843 |
| 6  | NM_174896 |
| 7  | NM_174919 |
| 8  | NM_175617 |
| 9  | NM_175736 |
| 10 | NM_175839 |
| 11 | NM_175861 |
| 12 | NM_176870 |
| 13 | NM_178177 |
| 14 | NM_181789 |
| 15 | NM_181801 |
| 16 | NM_182616 |
| 17 | NM_182687 |
| 18 | NM_182705 |
| 19 | NM_182965 |
| 20 | NM_183422 |
| 21 | NM_198060 |
| 22 | NM_198232 |
| 23 | NM_198433 |
| 24 | NM_198461 |
| 25 | NM_198573 |
| 26 | NM_198947 |
| 27 | NM_199420 |
| 28 | NM_201525 |
| 29 | NM_202002 |
| 30 | NM_203377 |
| 31 | NM_203401 |
| 32 | NM_206963 |
| 33 | NM_207380 |
| 34 | NM_207627 |
| 35 | NR_001447 |
| 36 | NR_001458 |
| 37 | NR_002578 |
| 38 | NR_002734 |
| 39 | NR_002824 |
| 40 | NR_002825 |
| 41 | NR_024330 |
| 42 | NR_024373 |
| 43 | NR_024431 |
| 44 | NR_027007 |
| 45 | NR_033752 |
| 46 | NR_034086 |
| 47 | NR_034115 |
| 48 | NR_034148 |
| 49 | NR_036540 |
| 50 | NR_038216 |
| 51 | NR_038461 |
| 52 |           |
| 53 |           |
| 54 |           |
| 55 |           |
| 56 |           |
| 57 |           |
| 58 |           |
| 59 |           |
| 60 |           |

For Peer Review Only

1  
2 NR\_038842  
3 NR\_040245  
4 NR\_046683  
5 NR\_046696  
6 NR\_103548  
7 NR\_103549  
8 NR\_125381  
9 NR\_125858  
10  
11 TCONS\_I2\_00008479  
12  
13 THC2546843  
14 THC2616237  
15 THC2686816  
16 XR\_245781  
17 XR\_246125  
18 XR\_425104  
19  
20  
21  
22  
23  
24  
25  
26  
27  
28  
29  
30  
31  
32  
33  
34  
35  
36  
37  
38  
39  
40  
41  
42  
43  
44  
45  
46  
47  
48  
49  
50  
51  
52  
53  
54  
55  
56  
57  
58  
59  
60

|    |                                                                 |
|----|-----------------------------------------------------------------|
| 1  |                                                                 |
| 2  | <b>Name</b>                                                     |
| 3  | NA                                                              |
| 4  | NA                                                              |
| 5  | NA                                                              |
| 6  | NA                                                              |
| 7  | NA                                                              |
| 8  | centromere protein M                                            |
| 9  | NA                                                              |
| 10 | centromere protein M                                            |
| 11 | NA                                                              |
| 12 | NA                                                              |
| 13 | NA                                                              |
| 14 | cytoskeleton associated protein 2-like                          |
| 15 | NA                                                              |
| 16 | NA                                                              |
| 17 | NA                                                              |
| 18 | NA                                                              |
| 19 | NA                                                              |
| 20 | NA                                                              |
| 21 | NA                                                              |
| 22 | MIR146A host gene                                               |
| 23 | NA                                                              |
| 24 | NA                                                              |
| 25 | NA                                                              |
| 26 | NA                                                              |
| 27 | NA                                                              |
| 28 | cancer susceptibility candidate 7 (non-protein coding)          |
| 29 | NA                                                              |
| 30 | NA                                                              |
| 31 | polo-like kinase 1                                              |
| 32 | NA                                                              |
| 33 | NA                                                              |
| 34 | NA                                                              |
| 35 | NA                                                              |
| 36 | NA                                                              |
| 37 | NA                                                              |
| 38 | SPC24, NDC80 kinetochore complex component                      |
| 39 | hexamethylene bis-acetamide inducible 2                         |
| 40 | NA                                                              |
| 41 | neuregulin 1                                                    |
| 42 | NA                                                              |
| 43 | NA                                                              |
| 44 | myristoylated alanine-rich protein kinase C substrate           |
| 45 | NA                                                              |
| 46 | NA                                                              |
| 47 | NA                                                              |
| 48 | NA                                                              |
| 49 | NA                                                              |
| 50 | WT1 antisense RNA                                               |
| 51 | NA                                                              |
| 52 | NA                                                              |
| 53 | NA                                                              |
| 54 | NA                                                              |
| 55 | NA                                                              |
| 56 | NA                                                              |
| 57 | NA                                                              |
| 58 | NA                                                              |
| 59 | NA                                                              |
| 60 | angiotensinogen (serpin peptidase inhibitor, clade A, member 8) |

1 Bloom syndrome, RecQ helicase-like  
2 collagen, type IV, alpha 4  
3 damage-specific DNA binding protein 2, 48kDa  
4 coagulation factor XIII, A1 polypeptide  
5 Fanconi anemia, complementation group A  
6 galactosylceramidase  
7 intercellular adhesion molecule 1  
8 integrin, alpha 6  
9 integrin, beta 3 (platelet glycoprotein IIIa, antigen CD61)  
10 MET proto-oncogene, receptor tyrosine kinase  
11 purine nucleoside phosphorylase  
12 protoporphyrinogen oxidase  
13 thrombomodulin  
14 low density lipoprotein receptor  
15 interleukin 1, beta  
16 solute carrier family 11 (proton-coupled divalent metal ion transporter), member 1  
17 chemokine (C-X-C motif) ligand 8  
18 tumor necrosis factor  
19 5-aminolevulinate synthase 1  
20 arachidonate 5-lipoxygenase  
21 biliverdin reductase B  
22 intercellular adhesion molecule 2  
23 integrin, beta 7  
24 primase, DNA, polypeptide 1 (49kDa)  
25 retinoic acid receptor, gamma  
26 intersectin 1 (SH3 domain protein)  
27 solute carrier family 2 (facilitated glucose transporter), member 9  
28 receptor accessory protein 3  
29 chemokine (C-C motif) ligand 3-like 3  
30 Pim-3 proto-oncogene, serine/threonine kinase  
31 microtubule associated tumor suppressor 1  
32 hematological and neurological expressed 1  
33 serpin peptidase inhibitor, clade A (alpha-1 antiproteinase, antitrypsin), member 1  
34 tumor protein D52-like 1  
35 numb homolog (Drosophila)  
36 inositol hexakisphosphate kinase 2  
37 optineurin  
38 chemokine (C-X-C motif) receptor 4  
39 PHD finger protein 19  
40 male-specific lethal 1 homolog (Drosophila)  
41 centromere protein P  
42 baculoviral IAP repeat containing 5  
43 insulin-like growth factor binding protein 3  
44 annexin A2 receptor  
45 establishment of sister chromatid cohesion N-acetyltransferase 2  
46 caspase recruitment domain family, member 16  
47 Fanconi anemia, complementation group D2  
48 adenosine monophosphate deaminase 3  
49 v-maf avian musculoaponeurotic fibrosarcoma oncogene homolog  
50 phosphorylase kinase, beta  
51  
52  
53  
54  
55  
56  
57  
58  
59  
60

SID1 transmembrane family, member 2  
N-acylethanolamine acid amidase  
nuclear protein, transcriptional regulator, 1  
structural maintenance of chromosomes 2  
FGR proto-oncogene, Src family tyrosine kinase  
Src-like-adaptor  
topoisomerase (DNA) II alpha  
tubulin, gamma 1  
zinc finger protein 697  
unc-13 homolog C (C. elegans)  
glycerol-3-phosphate dehydrogenase 2 (mitochondrial)  
WD repeat domain 62  
selenoprotein P, plasma, 1  
acid phosphatase, prostate  
progesterone and adipoQ receptor family member V  
lysosomal-associated membrane protein 2  
ATP-binding cassette, sub-family D (ALD), member 3  
histone cluster 2, H3d  
eukaryotic translation initiation factor 4E  
ring finger protein 212  
family with sequence similarity 86, member B2  
neuralized E3 ubiquitin protein ligase 1B  
methylenetetrahydrofolate dehydrogenase (NADP+ dependent) 2-like  
protein phosphatase 1, regulatory subunit 3G  
angiopoietin 1  
NA  
glypican 3  
baculoviral IAP repeat containing 3  
CD14 molecule  
hydroxypyruvate isomerase (putative)  
stimulated by retinoic acid 6  
ATPase, Ca++ transporting, type 2C, member 1  
carbonyl reductase 3  
cyclin A2  
pre T-cell antigen receptor alpha  
PDZ and LIM domain 5  
metallothionein 1H  
non-SMC condensin II complex, subunit G2  
slingshot protein phosphatase 2  
tumor necrosis factor, alpha-induced protein 8  
uridine phosphorylase 1  
uridine phosphorylase 1  
early B-cell factor 1  
tubulin, beta class I  
high mobility group AT-hook 2  
metallothionein 1G  
cysteine-rich protein 1 (intestinal)  
cysteine and glycine-rich protein 2  
chemokine (C-X3-C motif) receptor 1  
epithelial membrane protein 1

glypican 4  
chemokine (C-X-C motif) receptor 3  
glutathione S-transferase alpha 4  
tumor necrosis factor receptor superfamily, member 9  
interleukin-1 receptor-associated kinase 2  
aryl hydrocarbon receptor  
amphiregulin  
caveolin 1, caveolae protein, 22kDa  
CD9 molecule  
CD19 molecule  
CD69 molecule  
cyclin-dependent kinase 1  
centromere protein A  
centromere protein E, 312kDa  
CDC28 protein kinase regulatory subunit 1B  
clusterin  
chemokine (C-C motif) receptor 7  
solute carrier family 31 (copper transporter), member 2  
endothelin 1  
endothelin receptor type A  
early growth response 1  
epoxide hydrolase 2, cytoplasmic  
coagulation factor III (thromboplastin, tissue factor)  
Fc fragment of IgA receptor  
formyl peptide receptor 1  
heme oxygenase 1  
heat shock 70kDa protein 6 (HSP70B)  
interleukin 3 receptor, alpha (low affinity)  
interleukin 7 receptor  
inhibin, beta A  
integrin, alpha V  
killer cell lectin-like receptor subfamily C, member 1  
kinesin family member C1  
v-maf avian musculoaponeurotic fibrosarcoma oncogene homolog G  
melanoma antigen family B2  
malic enzyme 1, NADP(+)-dependent, cytosolic  
marker of proliferation Ki-67  
matrix metalloproteinase 1  
matrix metalloproteinase 10  
matrix metalloproteinase 12  
matrix metalloproteinase 19  
membrane protein, palmitoylated 1, 55kDa  
NA;phosphatidylethanolamine binding protein 1  
serpin peptidase inhibitor, clade B (ovalbumin), member 2  
protocadherin 1  
platelet-derived growth factor alpha polypeptide  
Pim-1 proto-oncogene, serine/threonine kinase  
mitogen-activated protein kinase kinase 6  
pentraxin 3, long  
regulator of G-protein signaling 2

1 regulator of G-protein signaling 16  
2 replication protein A3, 14kDa  
3 S100 calcium binding protein A8  
4 chemokine (C-C motif) ligand 3  
5 thymidine kinase 1, soluble  
6 pleckstrin homology-like domain, family A, member 2  
7 TTK protein kinase  
8 coronin, actin binding protein, 2A  
9 high mobility group AT-hook 2  
10 G protein-coupled receptor 68  
11 frizzled class receptor 1  
12 histone cluster 2, H2ac  
13 histone cluster 1, H3b  
14 RAD54-like (S. cerevisiae)  
15 tyrosylprotein sulfotransferase 1  
16 HIRA interacting protein 3  
17 semaphorin 7A, GPI membrane anchor (John Milton Hagen blood group)  
18 basic helix-loop-helix family, member e40  
19 exonuclease 1  
20 UDP-Gal:betaGlcNAc beta 1,3-galactosyltransferase, polypeptide 4  
21 ATP-binding cassette, sub-family C (CFTR/MRP), member 3  
22 cathepsin F  
23 tumor necrosis factor receptor superfamily, member 10d, decoy with truncated death domain  
24 gamma-glutamyl hydrolase (conjugase, folypolygammaglutamyl hydrolase)  
25 Fc fragment of IgG binding protein  
26 immediate early response 3  
27 sequestosome 1  
28 ZPR1 zinc finger  
29 coagulation factor II (thrombin) receptor-like 3  
30 protein regulator of cytokinesis 1  
31 butyrobetaine (gamma), 2-oxoglutarate dioxygenase (gamma-butyrobetaine hydroxylase) 1  
32 BCL2-related protein A1  
33 polo-like kinase 3  
34 DNA-damage-inducible transcript 3  
35 fms-related tyrosine kinase 3  
36 guanine nucleotide binding protein (G protein), gamma 11  
37 Ras-related associated with diabetes  
38 serine hydroxymethyltransferase 1 (soluble)  
39 solute carrier family 1 (glial high affinity glutamate transporter), member 3  
40 NA;prolyl 4-hydroxylase, alpha polypeptide II  
41 aurora kinase B  
42 pituitary tumor-transforming 1  
43 fatty acid desaturase 2  
44 carbohydrate (N-acetylglucosamine-6-O) sulfotransferase 2  
45 nuclear factor, erythroid 2-like 3  
46 BUB1 mitotic checkpoint serine/threonine kinase  
47 calmeglin  
48 DEAD (Asp-Glu-Ala-Asp) box polypeptide 10  
49 regulator of calcineurin 1  
50 dual specificity phosphatase 2

1 dual specificity phosphatase 5  
2 fibroblast activation protein, alpha  
3 neuregulin 1  
4 kinesin family member 11  
5 microsomeal glutathione S-transferase 3  
6 chemokine (C-C motif) ligand 20  
7 sparc/osteonectin, cwcw and kazal-like domains proteoglycan (testican) 1  
8 syntaxin 1A (brain)  
9 adaptor-related protein complex 3, beta 2 subunit  
10 cyclin B2  
11 cytokine receptor-like factor 1  
12 UDP-Gal:betaGlcNAc beta 1,4- galactosyltransferase, polypeptide 5  
13 apolipoprotein B mRNA editing enzyme, catalytic polypeptide-like 3B  
14 myosin binding protein H  
15 B-cell CLL/lymphoma 3  
16 calmodulin 3 (phosphorylase kinase, delta)  
17 cyclin-dependent kinase inhibitor 3  
18 E2F transcription factor 1  
19 sphingosine-1-phosphate receptor 3  
20 cortactin  
21 GTP binding protein overexpressed in skeletal muscle  
22 histone cluster 1, H1c  
23 heat shock 70kDa protein 1A  
24 heat shock 70kDa protein 1B  
25 heat shock 70kDa protein 5 (glucose-regulated protein, 78kDa)  
26 selenoprotein P, plasma, 1  
27 solute carrier family 20 (phosphate transporter), member 1  
28 vascular endothelial growth factor C  
29 chromatin assembly factor 1, subunit B (p60)  
30 eomesodermin  
31 trophinin associated protein  
32 poly (ADP-ribose) polymerase 2  
33 ATP-binding cassette, sub-family A (ABC1), member 1  
34 immunoglobulin superfamily containing leucine-rich repeat  
35 natural killer cell granule protein 7  
36 S100 calcium binding protein A12  
37 serum/glucocorticoid regulated kinase 1  
38 smoothened, frizzled class receptor  
39 nuclear receptor subfamily 1, group H, member 3  
40 peptidylprolyl isomerase F  
41 kinesin family member 20A  
42 ADP-ribosylation factor-like 4A  
43 metallothionein 1A  
44 metallothionein 1B;NA  
45 metallothionein 1H  
46 metallothionein 1X  
47 heparan sulfate (glucosamine) 3-O-sulfotransferase 3B1  
48 ATPase, class II, type 9A  
49 tubulin, alpha 1b  
50 tubulin, beta 3 class III



1 ST3 beta-galactoside alpha-2,3-sialyltransferase 6  
2 NDC80 kinetochore complex component  
3 platelet-derived growth factor receptor, alpha polypeptide  
4 platelet-derived growth factor receptor-like  
5 serpin peptidase inhibitor, clade E (nexin, plasminogen activator inhibitor type 1), member 2  
6 tumor necrosis factor, alpha-induced protein 3  
7 tumor necrosis factor, alpha-induced protein 2  
8 sperm associated antigen 5  
9 fibulin 1  
10 v-rel avian reticuloendotheliosis viral oncogene homolog B  
11 tissue factor pathway inhibitor 2  
12 pituitary tumor-transforming 2  
13 phosphoglycerate dehydrogenase  
14 BTG family, member 2  
15 macrophage receptor with collagenous structure  
16 EH-domain containing 1  
17 chromobox homolog 1  
18 kinesin family member 2C  
19 ADAM metallopeptidase with thrombospondin type 1 motif, 8  
20 WD repeat and HMG-box DNA binding protein 1  
21 protease, serine, 23  
22 citron rho-interacting serine/threonine kinase  
23 nurim (nuclear envelope membrane protein)  
24 paraneoplastic Ma antigen 2  
25 Opa interacting protein 5  
26 breast cancer 1, early onset  
27 Wolf-Hirschhorn syndrome candidate 1  
28 killer cell lectin-like receptor subfamily C, member 3  
29 CD93 molecule  
30 TPX2, microtubule-associated  
31 methionine sulfoxide reductase B2  
32 tubulin tyrosine ligase-like family member 1  
33 extra spindle pole bodies like 1, separase  
34 kinesin family member 4A  
35 v-maf avian musculoaponeurotic fibrosarcoma oncogene homolog F  
36 DnaJ (Hsp40) homolog, subfamily B, member 9  
37 glutaminyl-peptide cyclotransferase  
38 RAD54 homolog B (*S. cerevisiae*)  
39 six transmembrane epithelial antigen of the prostate 1  
40 hyaluronan-mediated motility receptor (RHAMM)  
41 PSMC3 interacting protein  
42 G-protein signaling modulator 2  
43 ST8 alpha-N-acetyl-neuraminide alpha-2,8-sialyltransferase 5  
44 SERTA domain containing 1  
45 low density lipoprotein receptor-related protein 12  
46 WD repeat domain 91  
47 ubiquitin-conjugating enzyme E2T  
48 inositol(myo)-1(or 4)-monophosphatase 2  
49 hematopoietic cell signal transducer  
50 integrin beta 3 binding protein (beta3-endonexin)

1 RASD family, member 2  
2 protein phosphatase 1, regulatory subunit 15A  
3 solute carrier family 7 (anionic amino acid transporter light chain, xc- system), member 11  
4 tumor necrosis factor, alpha-induced protein 8  
5 RAB26, member RAS oncogene family  
6 linker for activation of T cells;NA  
7 NIMA-related kinase 6  
8 cell death-inducing DFFA-like effector b  
9 Rho guanine nucleotide exchange factor (GEF) 10  
10 KIAA0408  
11 kinetochore associated 1  
12 KIAA0101  
13 Ras association (RalGDS/AF-6) domain family member 2  
14 KIAA0586  
15 discs, large (Drosophila) homolog-associated protein 5  
16 secernin 1  
17 tripartite motif containing 14  
18 maternal embryonic leucine zipper kinase  
19 kinesin family member 14  
20 DnaJ (Hsp40) homolog, subfamily C, member 9  
21 activity-regulated cytoskeleton-associated protein  
22 tripartite motif containing 2  
23 leucine rich repeat containing 8 family, member B;NA  
24 lymphocyte antigen 96  
25 mitochondrial pyruvate carrier 2  
26 transmembrane protein 158 (gene/pseudogene)  
27 zinc finger protein 521  
28 retinoic acid induced 14  
29 PHD finger protein 19  
30 RIB43A domain with coiled-coils 2  
31 family with sequence similarity 135, member B  
32 complement component 1, q subcomponent, A chain  
33 N(alpha)-acetyltransferase 20, NatB catalytic subunit  
34 androgen-induced 1  
35 polycystic kidney disease 2-like 1  
36 cytochrome b5 reductase 2  
37 prenylcysteine oxidase 1  
38 centromere protein F, 350/400kDa  
39 nucleolar and spindle associated protein 1  
40 G-2 and S-phase expressed 1  
41 ABI family, member 3  
42 denticleless E3 ubiquitin protein ligase homolog (Drosophila)  
43 tumor necrosis factor receptor superfamily, member 12A  
44 chloride intracellular channel 5  
45 polymerase (DNA directed), alpha 1, catalytic subunit  
46 excision repair cross-complementation group 6-like  
47 family with sequence similarity 46, member C  
48 DEP domain containing 1  
49 sema domain, immunoglobulin domain (Ig), transmembrane domain (TM) and short cytoplasmic domain, (sem  
50 host cell factor C1 regulator 1 (XPO1 dependent)

1 PARP1 binding protein  
2 cell division cycle associated 8  
3 centrosomal protein 55kDa  
4 abnormal spindle microtubule assembly  
5 leucine-rich repeat LGI family, member 2  
6 prolyl 3-hydroxylase 2  
7 transmembrane protein 184C  
8 proline rich 11  
9 Holliday junction recognition protein  
10 spermatogenesis associated 7  
11 leucine-rich repeat containing G protein-coupled receptor 4  
12 PDZ binding kinase  
13 calcium/calmodulin-dependent protein kinase II inhibitor 1  
14 cell migration inducing protein, hyaluronan binding  
15 ELMO/CED-12 domain containing 1  
16 cell division cycle associated 7-like  
17 sulfatase 2  
18 phosphodiesterase 7B  
19 telomeric repeat binding factor 2, interacting protein  
20 glucose-fructose oxidoreductase domain containing 1  
21 Ras and Rab interactor 2  
22 pseudouridylate synthase 7 (putative)  
23 DNA-damage-inducible transcript 4  
24 SLAM family member 8  
25 kinesin family member 15  
26 G protein-coupled receptor 84  
27 apoptosis, caspase activation inhibitor  
28 mannosidase, alpha, class 1C, member 1  
29 nuclear factor of kappa light polypeptide gene enhancer in B-cells inhibitor, alpha  
30 pellino E3 ubiquitin protein ligase 1  
31 SPC25, NDC80 kinetochore complex component  
32 adenosine A3 receptor  
33 heart development protein with EGF-like domains 1  
34 tRNA methyltransferase 5  
35 neuromedin B  
36 hes family bHLH transcription factor 4  
37 SLAM family member 7  
38 solute carrier family 30 (zinc transporter), member 1  
39 NLR family, CARD domain containing 4  
40 AXL receptor tyrosine kinase  
41 prokineticin 2  
42 thymosin beta 15a  
43 G protein-coupled receptor 88  
44 potassium channel, two pore domain subfamily K, member 12  
45 family with sequence similarity 111, member A  
46 cell death-inducing DFFA-like effector c  
47 ribokinase  
48 SAM domain, SH3 domain and nuclear localization signals 1  
49 chromosome 10 open reading frame 54  
50 non-SMC condensin I complex, subunit G

1 popeye domain containing 3  
2 regulatory factor X, 7  
3 ZFP69 zinc finger protein B  
4 membrane-spanning 4-domains, subfamily A, member 4A  
5 transmembrane protein 106C  
6 ChaC glutathione-specific gamma-glutamylcyclotransferase 1  
7 human immunodeficiency virus type I enhancer binding protein 3  
8 ATPase type 13A3  
9 acyl-CoA synthetase short-chain family member 3  
10 yrdC N(6)-threonylcarbamoyltransferase domain containing  
11 E2F transcription factor 8  
12 SHC SH2-domain binding protein 1  
13 CXADR-like membrane protein  
14 ubiquitin-like modifier activating enzyme 5  
15 DENN/MADD domain containing 2D  
16 pleckstrin homology domain containing, family H (with MyTH4 domain) member 3  
17 dedicator of cytokinesis 5  
18 PIF1 5-to-3 DNA helicase  
19 coiled-coil domain containing 170  
20 Fraser extracellular matrix complex subunit 1  
21 tribbles pseudokinase 1  
22 cytoplasmic polyadenylation element binding protein 4  
23 endonuclease/exonuclease/phosphatase family domain containing 1  
24 apolipoprotein L, 6  
25 chromatin licensing and DNA replication factor 1  
26 protein phosphatase 1, regulatory (inhibitor) subunit 14C  
27 cytochrome P450, family 19, subfamily A, polypeptide 1  
28 cell division cycle associated 3  
29 MAX dimerization protein 3  
30 APH1B gamma secretase subunit  
31 katanin p60 subunit A-like 2  
32 cyclin B1  
33 MYCBP associated protein  
34 PML-RARA regulated adaptor molecule 1  
35 acyl-CoA dehydrogenase family, member 11  
36 anthrax toxin receptor 1  
37 plexin A1  
38 zinc finger, MYND-type containing 12  
39 polymerase (RNA) III (DNA directed) polypeptide G (32kD)-like  
40 family with sequence similarity 213, member A  
41 zinc finger, BED-type containing 3  
42 junctophilin 4  
43 aspartate beta-hydroxylase  
44 acyl-CoA synthetase short-chain family member 1  
45 lysyl oxidase-like 3  
46 proline/serine-rich coiled-coil 1  
47 tubulin, alpha 1c  
48 glycerol-3-phosphate acyltransferase 3  
49 internexin neuronal intermediate filament protein, alpha  
50 Fc receptor-like A  
51  
52  
53  
54  
55  
56  
57  
58  
59  
60

1 chromosome 1 open reading frame 198  
2 Rho guanine nucleotide exchange factor (GEF) 39  
3 ZW10 interacting kinetochore protein  
4 NIMA-related kinase 9  
5 naked cuticle homolog 2 (Drosophila)  
6 scinderin  
7 urocortin 2  
8 autophagy related 16-like 2  
9 HAUS augmin-like complex, subunit 8  
10 tripartite motif containing 47  
11 ethanolaminephosphotransferase 1  
12 sialic acid binding Ig-like lectin 11  
13 transmembrane protein 200A  
14 retinol binding protein 7, cellular  
15 myosin light chain kinase  
16 ANKH inorganic pyrophosphate transport regulator  
17 calcium and integrin binding family member 3  
18 anthrax toxin receptor 2;NA  
19 phosphoserine aminotransferase 1  
20 cyclin-dependent kinase inhibitor 2C (p18, inhibits CDK4)  
21 oxysterol binding protein-like 1A  
22 cell division cycle associated 5  
23 phosphatase and actin regulator 3  
24 collagen, type XI, alpha 2  
25 osteoclast stimulatory transmembrane protein  
26 Jun dimerization protein 2  
27 cAMP responsive element binding protein 3-like 4  
28 potassium channel tetramerization domain containing 12  
29 toll-like receptor 4  
30 kinesin family member 23  
31 high mobility group nucleosomal binding domain 3  
32 myeloma overexpressed  
33 guanidinoacetate N-methyltransferase  
34 secretory carrier membrane protein 5  
35 bridging integrator 1  
36 SPOC domain containing 1  
37 ankyrin repeat domain 35  
38 mitogen-activated protein kinase kinase 3  
39 microsomal glutathione S-transferase 1  
40 centrosomal protein 128kDa  
41 cell division cycle associated 2  
42 NA;zinc finger protein 366  
43 interleukin 4 induced 1  
44 KN motif and ankyrin repeat domains 1  
45 NIM1 serine/threonine protein kinase  
46 SH2 domain containing 3C  
47 tachykinin 4 (hemokinin)  
48 aldehyde dehydrogenase 1 family, member A2  
49 retinol dehydrogenase 10 (all-trans)  
50 DCN1, defective in cullin neddylation 1, domain containing 3  
51  
52  
53  
54  
55  
56  
57  
58  
59  
60

1 lamin tail domain containing 2  
2 transmembrane protein 145  
3 solute carrier family 9, subfamily A (NHE9, cation proton antiporter 9), member 9  
4 interleukin 1 receptor antagonist  
5 chromosome 1 open reading frame 162  
6 Rho GTPase activating protein 27  
7 metallothionein 1E;NA  
8 formin-like 3  
9 spermine oxidase  
10 transmembrane and tetratricopeptide repeat containing 1  
11 metallothionein 1M  
12 nicotinamide nucleotide adenylyltransferase 3  
13 gliomedin  
14 ubiquitin-conjugating enzyme E2C  
15 actin-related protein 2/3 complex inhibitor  
16 protein kinase, membrane associated tyrosine/threonine 1  
17 family with sequence similarity 101, member B  
18 sphingosine kinase 1  
19 TSC22 domain family, member 1  
20 nebulin-related anchoring protein  
21 ribonuclease, RNase A family, 1 (pancreatic)  
22 aurora kinase A  
23 LON peptidase N-terminal domain and ring finger 2  
24 energy homeostasis associated  
25 family with sequence similarity 111, member B  
26 polymerase (DNA directed), theta  
27 adhesion G protein-coupled receptor G1  
28 forkhead box M1  
29 myoglobin  
30 stathmin 1  
31 retinoic acid receptor responder (tazarotene induced) 1  
32 chromosome 15 open reading frame 52  
33 ATP-binding cassette, sub-family G (WHITE), member 1  
34 metallothionein 1L (gene/pseudogene)  
35 MIR155 host gene  
36 growth arrest-specific 5 (non-protein coding);NA  
37 pituitary tumor-transforming 3, pseudogene  
38 hect domain and RLD 2 pseudogene 2  
39 sialic acid binding Ig-like lectin 16 (gene/pseudogene)  
40 NA;sperm acrosome associated 6, pseudogene  
41 NA  
42 ZMIZ1 antisense RNA 1  
43 NA;THUMPD3 antisense RNA 1  
44 NmrA-like family domain containing 1 pseudogene  
45 NA  
46 NA;STXBP5 antisense RNA 1  
47 NA  
48 NA  
49 NA  
50 long intergenic non-protein coding RNA 892;NA

|    |                                               |
|----|-----------------------------------------------|
| 1  |                                               |
| 2  | long intergenic non-protein coding RNA 1137   |
| 3  | long intergenic non-protein coding RNA 941;NA |
| 4  | NA                                            |
| 5  | NA                                            |
| 6  | NA                                            |
| 7  | NA                                            |
| 8  | NA                                            |
| 9  | NA                                            |
| 10 | NA                                            |
| 11 | NA                                            |
| 12 | NA                                            |
| 13 | NA                                            |
| 14 | NA                                            |
| 15 | NA                                            |
| 16 | NA                                            |
| 17 | NA                                            |
| 18 | NA                                            |
| 19 | NA                                            |
| 20 |                                               |
| 21 |                                               |
| 22 |                                               |
| 23 |                                               |
| 24 |                                               |
| 25 |                                               |
| 26 |                                               |
| 27 |                                               |
| 28 |                                               |
| 29 |                                               |
| 30 |                                               |
| 31 |                                               |
| 32 |                                               |
| 33 |                                               |
| 34 |                                               |
| 35 |                                               |
| 36 |                                               |
| 37 |                                               |
| 38 |                                               |
| 39 |                                               |
| 40 |                                               |
| 41 |                                               |
| 42 |                                               |
| 43 |                                               |
| 44 |                                               |
| 45 |                                               |
| 46 |                                               |
| 47 |                                               |
| 48 |                                               |
| 49 |                                               |
| 50 |                                               |
| 51 |                                               |
| 52 |                                               |
| 53 |                                               |
| 54 |                                               |
| 55 |                                               |
| 56 |                                               |
| 57 |                                               |
| 58 |                                               |
| 59 |                                               |
| 60 |                                               |

| Transcript ID   |
|-----------------|
| ENST00000375353 |
| ENST00000415536 |
| ENST00000513626 |
| ENST00000517927 |
| ENST00000561362 |
| ENST00000567054 |
| ENST00000596510 |
| ENST00000612661 |
| ENST00000621947 |
| Inc-ARRDC3-1:10 |
| Inc-ARRDC3-1:6  |
| Inc-KATNAL2-4:1 |
| NM_000092       |
| NM_000201       |
| NM_000212       |
| NM_000245       |
| NM_000527       |
| NM_000584       |
| NM_000688       |
| NM_001001437    |
| NM_001008540    |
| NM_001009936    |
| NM_001025390    |
| NM_001042483    |
| NM_001067       |
| NM_001093726    |
| NM_001144978    |
| NM_001165       |
| NM_001174104    |
| NM_001199182    |
| NM_001276687    |
| NM_001301267    |
| NM_001337       |
| NM_001570       |
| NM_001831       |
| NM_001838       |
| NM_001957       |
| NM_002133       |
| NM_002155       |
| NM_002259       |
| NM_002364       |
| NM_002395       |
| NM_002421       |
| NM_002426       |
| NM_002429       |
| NM_002648       |
| NM_002964       |
| NM_002983       |
| NM_003483       |



|    |           |
|----|-----------|
| 1  |           |
| 2  | NM_003485 |
| 3  | NM_003670 |
| 4  | NM_003786 |
| 5  | NM_003890 |
| 6  | NM_003897 |
| 7  | NM_003900 |
| 8  | NM_003986 |
| 9  | NM_004073 |
| 10 | NM_004165 |
| 11 | NM_004172 |
| 12 | NM_004289 |
| 13 | NM_004418 |
| 14 | NM_004591 |
| 15 | NM_004644 |
| 16 | NM_005178 |
| 17 | NM_005261 |
| 18 | NM_005345 |
| 19 | NM_005346 |
| 20 | NM_005410 |
| 21 | NM_005429 |
| 22 | NM_005627 |
| 23 | NM_005946 |
| 24 | NM_005947 |
| 25 | NM_005951 |
| 26 | NM_005952 |
| 27 | NM_006086 |
| 28 | NM_006290 |
| 29 | NM_006291 |
| 30 | NM_006509 |
| 31 | NM_006528 |
| 32 | NM_007257 |
| 33 | NM_012072 |
| 34 | NM_012323 |
| 35 | NM_013305 |
| 36 | NM_013437 |
| 37 | NM_014330 |
| 38 | NM_014331 |
| 39 | NM_014702 |
| 40 | NM_015193 |
| 41 | NM_015912 |
| 42 | NM_018176 |
| 43 | NM_018241 |
| 44 | NM_018492 |
| 45 | NM_018993 |
| 46 | NM_020529 |
| 47 | NM_020810 |
| 48 | NM_021170 |
| 49 | NM_021181 |
| 50 | NM_021194 |
| 51 | NM_021913 |

|    |            |
|----|------------|
| 1  |            |
| 2  | NM_021935  |
| 3  | NM_022049  |
| 4  | NM_022361  |
| 5  | NM_024769  |
| 6  | NM_025059  |
| 7  | NM_032208  |
| 8  | NM_032717  |
| 9  | NM_033199  |
| 10 | NM_033452  |
| 11 | NM_052884  |
| 12 | NM_1001438 |
| 13 | NM_139346  |
| 14 | NM_145109  |
| 15 | NM_152625  |
| 16 | NM_152899  |
| 17 | NM_175617  |
| 18 | NM_175618  |
| 19 | NM_176870  |
| 20 | NM_182705  |
| 21 | NM_182965  |
| 22 | NM_2156    |
| 23 | NM_25060   |
| 24 | NM_5948    |
| 25 | NR_001447  |
| 26 | NR_002825  |
| 27 | NR_033752  |
| 28 | NR_038216  |
| 29 | NR_046696  |
| 30 | NR_103548  |
| 31 | NR_103549  |
| 32 |            |
| 33 |            |
| 34 |            |
| 35 |            |
| 36 |            |
| 37 |            |
| 38 |            |
| 39 |            |
| 40 |            |
| 41 |            |
| 42 |            |
| 43 |            |
| 44 |            |
| 45 |            |
| 46 |            |
| 47 |            |
| 48 |            |
| 49 |            |
| 50 |            |
| 51 |            |
| 52 |            |
| 53 |            |
| 54 |            |
| 55 |            |
| 56 |            |
| 57 |            |
| 58 |            |
| 59 |            |
| 60 |            |

| Name                                                             |
|------------------------------------------------------------------|
| NA                                                               |
| NA                                                               |
| NA                                                               |
| MIR146A host gene                                                |
| NA                                                               |
| NA                                                               |
| NA                                                               |
| myristoylated alanine-rich protein kinase C substrate            |
| NA                                                               |
| NA                                                               |
| NA                                                               |
| NA                                                               |
| collagen, type IV, alpha 4                                       |
| intercellular adhesion molecule 1                                |
| integrin, beta 3 (platelet glycoprotein IIIa, antigen CD61)      |
| MET proto-oncogene, receptor tyrosine kinase                     |
| low density lipoprotein receptor                                 |
| chemokine (C-X-C motif) ligand 8                                 |
| 5-aminolevulinate synthase 1                                     |
| chemokine (C-C motif) ligand 3-like 3                            |
| chemokine (C-X-C motif) receptor 4                               |
| PHD finger protein 19                                            |
| adenosine monophosphate deaminase 3                              |
| nuclear protein, transcriptional regulator, 1                    |
| topoisomerase (DNA) II alpha                                     |
| selenoprotein P, plasma, 1                                       |
| methylenetetrahydrofolate dehydrogenase (NADP+ dependent) 2-like |
| baculoviral IAP repeat containing 3                              |
| CD14 molecule                                                    |
| ATPase, Ca++ transporting, type 2C, member 1                     |
| metallothionein 1H                                               |
| metallothionein 1G                                               |
| chemokine (C-X3-C motif) receptor 1                              |
| interleukin-1 receptor-associated kinase 2                       |
| clusterin                                                        |
| chemokine (C-C motif) receptor 7                                 |
| endothelin receptor type A                                       |
| heme oxygenase 1                                                 |
| heat shock 70kDa protein 6 (HSP70B)                              |
| killer cell lectin-like receptor subfamily C, member 1           |
| melanoma antigen family B2                                       |
| malic enzyme 1, NADP(+)-dependent, cytosolic                     |
| matrix metalloproteinase 1                                       |
| matrix metalloproteinase 12                                      |
| matrix metalloproteinase 19                                      |
| Pim-1 proto-oncogene, serine/threonine kinase                    |
| S100 calcium binding protein A8                                  |
| chemokine (C-C motif) ligand 3                                   |
| high mobility group AT-hook 2                                    |

1 G protein-coupled receptor 68  
2 basic helix-loop-helix family, member e40  
3 ATP-binding cassette, sub-family C (CFTR/MRP), member 3  
4 Fc fragment of IgG binding protein  
5 immediate early response 3  
6 sequestosome 1  
7 butyrobetaine (gamma), 2-oxoglutarate dioxygenase (gamma-butyrobetaine hydroxylase) 1  
8 polo-like kinase 3  
9 Ras-related associated with diabetes  
10 solute carrier family 1 (glial high affinity glutamate transporter), member 3  
11 nuclear factor, erythroid 2-like 3  
12 dual specificity phosphatase 2  
13 chemokine (C-C motif) ligand 20  
14 adaptor-related protein complex 3, beta 2 subunit  
15 B-cell CLL/lymphoma 3  
16 GTP binding protein overexpressed in skeletal muscle  
17 heat shock 70kDa protein 1A  
18 heat shock 70kDa protein 1B  
19 selenoprotein P, plasma, 1  
20 vascular endothelial growth factor C  
21 serum/glucocorticoid regulated kinase 1  
22 metallothionein 1A  
23 metallothionein 1B;NA  
24 metallothionein 1H  
25 metallothionein 1X  
26 tubulin, beta 3 class III  
27 tumor necrosis factor, alpha-induced protein 3  
28 tumor necrosis factor, alpha-induced protein 2  
29 v-rel avian reticuloendotheliosis viral oncogene homolog B  
30 tissue factor pathway inhibitor 2  
31 paraneoplastic Ma antigen 2  
32 CD93 molecule  
33 v-maf avian musculoaponeurotic fibrosarcoma oncogene homolog F  
34 ST8 alpha-N-acetyl-neuraminide alpha-2,8-sialyltransferase 5  
35 low density lipoprotein receptor-related protein 12  
36 protein phosphatase 1, regulatory subunit 15A  
37 solute carrier family 7 (anionic amino acid transporter light chain, xc- system), member 11  
38 KIAA0408  
39 activity-regulated cytoskeleton-associated protein  
40 family with sequence similarity 135, member B  
41 leucine-rich repeat LGI family, member 2  
42 transmembrane protein 184C  
43 PDZ binding kinase  
44 Ras and Rab interactor 2  
45 nuclear factor of kappa light polypeptide gene enhancer in B-cells inhibitor, alpha  
46 tRNA methyltransferase 5  
47 hes family bHLH transcription factor 4  
48 SLAM family member 7  
49 solute carrier family 30 (zinc transporter), member 1  
50 AXL receptor tyrosine kinase

|    |                                                         |
|----|---------------------------------------------------------|
| 1  |                                                         |
| 2  | prokineticin 2                                          |
| 3  | G protein-coupled receptor 88                           |
| 4  | popeye domain containing 3                              |
| 5  | CXADR-like membrane protein                             |
| 6  | coiled-coil domain containing 170                       |
| 7  | anthrax toxin receptor 1                                |
| 8  | glycerol-3-phosphate acyltransferase 3                  |
| 9  | urocortin 2                                             |
| 10 | tripartite motif containing 47                          |
| 11 | sialic acid binding Ig-like lectin 11                   |
| 12 |                                                         |
| 13 |                                                         |
| 14 |                                                         |
| 15 | bridging integrator 1                                   |
| 16 | mitogen-activated protein kinase kinase 3               |
| 17 | NA;zinc finger protein 366                              |
| 18 | interleukin 4 induced 1                                 |
| 19 | metallothionein 1E;NA                                   |
| 20 |                                                         |
| 21 |                                                         |
| 22 | metallothionein 1M                                      |
| 23 | family with sequence similarity 101, member B           |
| 24 | sphingosine kinase 1                                    |
| 25 |                                                         |
| 26 |                                                         |
| 27 |                                                         |
| 28 |                                                         |
| 29 | metallothionein 1L (gene/pseudogene)                    |
| 30 | sialic acid binding Ig-like lectin 16 (gene/pseudogene) |
| 31 | NmrA-like family domain containing 1 pseudogene         |
| 32 | NA                                                      |
| 33 | NA                                                      |
| 34 | NA                                                      |
| 35 | NA                                                      |
| 36 |                                                         |
| 37 |                                                         |
| 38 |                                                         |
| 39 |                                                         |
| 40 |                                                         |
| 41 |                                                         |
| 42 |                                                         |
| 43 |                                                         |
| 44 |                                                         |
| 45 |                                                         |
| 46 |                                                         |
| 47 |                                                         |
| 48 |                                                         |
| 49 |                                                         |
| 50 |                                                         |
| 51 |                                                         |
| 52 |                                                         |
| 53 |                                                         |
| 54 |                                                         |
| 55 |                                                         |
| 56 |                                                         |
| 57 |                                                         |
| 58 |                                                         |
| 59 |                                                         |
| 60 |                                                         |

**Exposure: 24h Silver nanoparticles (20 nm)**

| Probe ID       | TargetID     | GeneSymbol |
|----------------|--------------|------------|
| A_23_P120227   | NM_030915    | LBH        |
| A_23_P344421   | NM_019055    | ROBO4      |
| A_24_P406754   | NM_032211    | LOXL4      |
| A_23_P254507   | NM_139211    | HOPX       |
| A_24_P305570   | NM_018993    | RIN2       |
| A_23_P21495    | NM_003890    | FCGBP      |
| A_33_P3402329  | NR_024607    | MIR503HG   |
| A_23_P86470    | NM_003956    | CH25H      |
| A_23_P150316   | NM_002426    | MMP12      |
| A_33_P3412087  | NM_025059    | CCDC170    |
| A_23_P151046   | NM_002259    | KLRC1      |
| A_24_P347378   | NM_001629    | ALOX5AP    |
| A_23_P35995    | NM_024769    | CLMP       |
| A_23_P256107   | NM_006665    | HPSE       |
| A_23_P121926   | NM_005410    | SEPP1      |
| A_23_P95930    | NM_003483    | HMGA2      |
| A_33_P3227400  | NM_000092    | COL4A4     |
| A_24_P931443   | NM_003485    | GPR68      |
| A_23_P54144    | NM_001202    | BMP4       |
| A_23_P145606   | NM_001006630 | CHRM2      |
| A_33_P3326432  | NM_003009    | SEPW1      |
| A_23_P371039   | NM_002531    | NTSR1      |
| A_33_P3283480  | NM_148170    | CTSC       |
| A_23_P116264   | NM_006176    | NRGN       |
| A_33_P3315906  | NM_032611    | PTP4A3     |
| A_23_P407565   | NM_001337    | CX3CR1     |
| A_24_P339560   | NM_052884    | SIGLEC11   |
| A_32_P112493   | NM_138370    | PKDCC      |
| A_23_P87049    | NM_003105    | SORL1      |
| A_24_P379820   | NM_030926    | ITM2C      |
| A_23_P150064   | NM_024756    | MMRN2      |
| A_24_P354715   | NM_002526    | NT5E       |
| A_23_P51397    | NM_001008493 | ENAH       |
| A_33_P3242733  | NM_138370    | PKDCC      |
| A_22_P00023038 | NM_145159    | JAG2       |
| A_23_P18739    | NM_018241    | TMEM184C   |
| A_23_P401472   | NM_000740    | CHRM3      |
| A_32_P56001    | NM_012072    | CD93       |
| A_33_P3268472  | NM_001114173 | CTSC       |
| A_23_P211957   | NM_001024847 | TGFBR2     |
| A_33_P3364268  | NM_030915    | LBH        |
| A_23_P379789   | NM_013305    | ST8SIA5    |
| A_24_P299318   | NM_182705    | FAM101B    |
| A_32_P68097    | NM_015912    | FAM135B    |
| A_33_P3280721  | NM_001002292 | WLS        |
| A_23_P154566   | NM_032883    | TOX2       |
| A_23_P27724    | NM_003009    | SEPW1      |

|    |                |                 |              |
|----|----------------|-----------------|--------------|
| 1  |                |                 |              |
| 2  | A_23_P102731   | NM_175839       | SMOX         |
| 3  | A_24_P391586   | NM_178507       | OAF          |
| 4  | A_23_P156327   | NM_000358       | TGFB1        |
| 5  | A_23_P211207   | NM_001112       | ADARB1       |
| 6  | A_24_P325520   | NM_002959       | SORT1        |
| 7  | A_23_P24157    | NM_032709       | PYROXD2      |
| 8  | A_23_P52761    | NM_002423       | MMP7         |
| 9  | A_23_P89941    | NM_001800       | CDKN2D       |
| 10 | A_24_P107859   | NM_152594       | SPRED1       |
| 11 | A_33_P3239849  | NM_201397       | GPX1         |
| 12 | A_23_P218442   | NM_002483       | CEACAM6      |
| 13 | A_33_P3345294  | ENST00000368966 | CCDC162P     |
| 14 | A_33_P3415191  | NM_005603       | ATP8B1       |
| 15 | A_21_P0013981  | ENST00000481779 | CHRM3        |
| 16 | A_23_P114057   | NM_017789       | SEMA4C       |
| 17 | A_23_P14302    | NR_026779       | LINC00341    |
| 18 | A_23_P151506   | NM_016445       | PLEK2        |
| 19 | A_33_P3240946  | NM_001280544    | DPF3         |
| 20 | A_33_P3364263  | NM_030915       | LBH          |
| 21 | A_23_P145024   | NM_000024       | ADRB2        |
| 22 | A_23_P330561   | NM_174918       | MCEMP1       |
| 23 | A_23_P401904   | NM_001009936    | PHF19        |
| 24 | A_22_P00011983 | NR_024607       | MIR503HG     |
| 25 | A_23_P102109   | NM_006000       | TUBA4A       |
| 26 | A_24_P844984   | NM_002644       | PIGR         |
| 27 | A_23_P94800    | NM_002961       | S100A4       |
| 28 | A_23_P201400   | NM_000309       | PPOX         |
| 29 | A_23_P76529    | NM_000889       | ITGB7        |
| 30 | A_32_P160045   | NM_152665       | TCTEX1D1     |
| 31 | A_33_P3306024  | NR_002825       | SIGLEC16     |
| 32 | A_23_P318300   | NM_133646       | ZAK          |
| 33 | A_33_P3231414  | NM_006669       | LILRB1       |
| 34 | A_21_P0005818  | NR_121621       | LOC100507420 |
| 35 | A_23_P22660    | NM_006639       | CYSLTR1      |
| 36 | A_23_P25155    | NM_020370       | GPR84        |
| 37 | A_23_P353717   | NM_152308       | RMI2         |
| 38 | A_23_P64837    | NM_001031628    | SMAGP        |
| 39 | A_23_P79069    | NM_022904       | RASAL3       |
| 40 | A_33_P3416682  | NM_001242815    | C2orf91      |
| 41 | A_23_P200260   | NM_014801       | PCNXL2       |
| 42 | A_23_P161218   | NM_014391       | ANKRD1       |
| 43 | A_23_P26954    | NM_006373       | VAT1         |
| 44 | A_23_P376799   | NM_015262       | FAM21C       |
| 45 | A_23_P83110    | NM_018249       | CDK5RAP2     |
| 46 | A_33_P3250398  | ENST00000503833 | CTS2         |
| 47 | A_33_P3305105  | NM_198315       | VWA5A        |
| 48 | A_23_P134854   | NM_194284       | CLDN23       |
| 49 | A_23_P256581   | NM_021620       | PRDM13       |
| 50 | A_23_P73239    | NM_205842       | NCKAP1       |
| 51 | A_24_P394533   | NM_000434       | NEU1         |

|    |                |                 |               |
|----|----------------|-----------------|---------------|
| 1  |                |                 |               |
| 2  | A_21_P0007252  | Inc-TMEM135-2:1 | Inc-TMEM135-2 |
| 3  | A_22_P00018349 | ENST00000570843 |               |
| 4  | A_33_P7476087  | NR_027007       | THUMPD3-AS1   |
| 5  | A_22_P00010194 | ENST00000427022 |               |
| 6  | A_23_P118427   | NM_145109       | MAP2K3        |
| 7  | A_24_P329600   | NM_013438       | UBQLN1        |
| 8  | A_21_P0013726  | NR_122077       | LOC403323     |
| 9  | A_22_P00010710 | Inc-NFYB-1:1    | Inc-NFYB-1    |
| 10 | A_23_P107587   | NM_000271       | NPC1          |
| 11 | A_23_P155900   | NM_053036       | NPFFR2        |
| 12 | A_23_P200801   | NM_001002811    | PDE4DIP       |
| 13 | A_24_P109214   | NM_001645       | APOC1         |
| 14 | A_24_P290354   | NM_006007       | ZFAND5        |
| 15 | A_33_P3218356  | NM_020141       | TMEM167B      |
| 16 | A_23_P138693   | NM_004808       | NMT2          |
| 17 | A_23_P91512    | NM_144492       | CLDN14        |
| 18 | A_23_P93623    | NM_004231       | ATP6V1F       |
| 19 | A_23_P99172    | NM_032358       | CCDC77        |
| 20 | A_24_P20200    | NM_001267066    | PLEKHB2       |
| 21 | A_24_P206344   | NM_152557       | ZNF746        |
| 22 | A_32_P80741    | NM_001007176    | C8orf22       |
| 23 | A_19_P00320274 | NR_024431       | ZMIZ1-AS1     |
| 24 | A_23_P121082   | NM_000158       | GBE1          |
| 25 | A_23_P211850   | NM_020676       | ABHD6         |
| 26 | A_23_P212715   | NM_170662       | CBLB          |
| 27 | A_23_P24004    | NM_001547       | IFIT2         |
| 28 | A_23_P30603    | NM_003649       | DDO           |
| 29 | A_32_P42574    | NM_032800       | C1orf198      |
| 30 | A_33_P3671506  | AK021734        | LOC153811     |
| 31 | A_23_P54357    | NM_033195       | LDHAL6B       |
| 32 | A_23_P61398    | NM_001001852    | PIM3          |
| 33 | A_33_P3271323  | NM_012249       | RHOQ          |
| 34 | A_23_P110212   | NM_001995       | ACSL1         |
| 35 | A_23_P139820   | NM_000617       | SLC11A2       |
| 36 | A_23_P146456   | NM_001333       | CTSV          |
| 37 | A_23_P207742   | NM_003250       | THRA          |
| 38 | A_23_P214766   | NM_006734       | HIVEP2        |
| 39 | A_32_P49848    | NM_012249       | RHOQ          |
| 40 | A_33_P3418170  | NM_014314       | DDX58         |
| 41 | A_23_P166408   | NM_020530       | OSM           |
| 42 | A_23_P208389   | NM_021913       | AXL           |
| 43 | A_33_P3544856  | Inc-ERC1-1:2    | Inc-ERC1-1    |
| 44 | A_19_P00322977 | NR_109854       | LINC-PINT     |
| 45 | A_23_P114740   | NM_000186       | CFH           |
| 46 | A_23_P140154   | NM_001098621    | TMEM251       |
| 47 | A_23_P70060    | NM_176895       | PPAP2A        |
| 48 | A_33_P3304372  | NM_018342       | TMEM144       |
| 49 | A_21_P0003941  | ENST00000513626 | LUCAT1        |
| 50 | A_23_P34142    | NM_016303       | WBP5          |
| 51 | A_23_P34744    | NM_000396       | CTSK          |



|    |                |                   |                |
|----|----------------|-------------------|----------------|
| 1  |                |                   |                |
| 2  | A_24_P286114   | NM_004172         | SLC1A3         |
| 3  | A_33_P3251093  | NM_078483         | SLC36A1        |
| 4  | A_21_P0002904  | ENST00000495159   |                |
| 5  | A_23_P411296   | NM_005194         | CEBPB          |
| 6  | A_23_P88351    | NM_181598         | ATL1           |
| 7  | A_24_P173754   | NM_030806         | C1orf21        |
| 8  | A_33_P3385376  | NM_001040709      | SYPL2          |
| 9  | A_23_P252106   | NM_003821         | RIPK2          |
| 10 | A_32_P151823   | ENST00000521369   |                |
| 11 | A_33_P3323914  |                   |                |
| 12 | A_33_P3380897  | NM_001695         | ATP6V1C1       |
| 13 | A_33_P3404954  | NM_001172702      | SLC38A6        |
| 14 | A_21_P0001225  | ENST00000433576   |                |
| 15 | A_21_P0002048  | ENST00000427020   | LINC01121      |
| 16 | A_21_P0004540  | lnc-CPEB4-1:1     | lnc-CPEB4-1    |
| 17 | A_21_P0012676  | NR_026575         | GK3P           |
| 18 | A_23_P125680   | NM_017938         | TMEM255A       |
| 19 | A_23_P433855   | NM_005613         | RGS4           |
| 20 | A_24_P20120    | NM_018084         | CCDC88A        |
| 21 | A_24_P381494   | NM_000617         | SLC11A2        |
| 22 | A_24_P62783    | NM_004102         | FABP3          |
| 23 | A_33_P3257574  | XR_241872         | LOC101928958   |
| 24 | A_33_P3369336  | NM_002054         | GCG            |
| 25 | A_23_P29953    | NM_172175         | IL15           |
| 26 | A_24_P53051    | NM_171846         | LACTB          |
| 27 | A_32_P75094    | NM_032797         | AIFM2          |
| 28 | A_33_P3237775  | NM_005693         | NR1H3          |
| 29 | A_23_P206661   | NM_000903         | NQO1           |
| 30 | A_23_P360626   | NM_178836         | PLD6           |
| 31 | A_24_P296698   | NM_145109         | MAP2K3         |
| 32 | A_33_P3405334  | NM_000405         | GM2A           |
| 33 | A_23_P145874   | ENST00000411955   | SAMD9L         |
| 34 | A_23_P154894   | NM_000100         | CSTB           |
| 35 | A_23_P47790    | NM_005371         | METTL1         |
| 36 | A_24_P191588   | NM_000688         | ALAS1          |
| 37 | A_32_P122754   | NM_080655         | MSANTD3        |
| 38 | A_33_P3216207  | ENST00000418567   | LOC102724168   |
| 39 | A_22_P00009788 | ENST00000514662   |                |
| 40 | A_23_P345118   | NM_002648         | PIM1           |
| 41 | A_24_P126741   | ENST00000470810   |                |
| 42 | A_33_P3242508  | NM_199450         | ZNF365         |
| 43 | A_23_P19673    | NM_005627         | SGK1           |
| 44 | A_23_P69310    | NM_003965         | CCRL2          |
| 45 | A_33_P3341424  | NM_012334         | MYO10          |
| 46 | A_21_P0003297  | lnc-SLC12A8-1:1   | lnc-SLC12A8-1  |
| 47 | A_21_P0012837  | TCONS_I2_000224:1 | XLOC_I2_011669 |
| 48 | A_22_P00023295 | lnc-AKIRIN1-1:1   | lnc-AKIRIN1-1  |
| 49 | A_23_P69908    | NM_002064         | GLRX           |
| 50 | A_24_P649624   | NM_183416         | KIF1B          |
| 51 | A_33_P3264846  | ENST00000610760   | SAMD9L         |

|                |                 |               |
|----------------|-----------------|---------------|
| A_22_P00006819 | NR_038852       | LINC00929     |
| A_23_P31143    | NM_001003395    | TPD52L1       |
| A_23_P34915    | NM_001040619    | ATF3          |
| A_23_P45475    | NM_000169       | GLA           |
| A_33_P3221293  | NM_004403       | DFNA5         |
| A_33_P3256894  | NM_001169107    | FAM21C        |
| A_21_P0005759  | lnc-FER1L6-1:2  | lnc-FER1L6-1  |
| A_23_P24784    | NM_003282       | TNNI2         |
| A_23_P88119    | NM_006644       | HSPH1         |
| A_33_P3400763  | NM_001080400    | PLIN4         |
| A_21_P0000841  | NR_038926       | PRKAG2-AS1    |
| A_23_P40096    | NM_000312       | PROC          |
| A_24_P363679   | NM_015941       | ATP6V1H       |
| A_24_P396994   | NM_001690       | ATP6V1A       |
| A_32_P89310    | NM_001080475    | PLEKHM3       |
| A_33_P3323298  | NM_002228       | JUN           |
| A_23_P40956    | NM_016362       | GHRL          |
| A_23_P63026    | NM_006499       | LGALS8        |
| A_21_P0004348  | lnc-SLC9A3-1:1  | lnc-SLC9A3-1  |
| A_22_P00016430 | ENST00000554254 |               |
| A_23_P12343    | NM_000849       | GSTM3         |
| A_23_P36658    | NM_145791       | MGST1         |
| A_23_P68155    | NM_022168       | IFIH1         |
| A_33_P3225587  | NM_025146       | NAA50         |
| A_23_P23346    | NM_006818       | MLLT11        |
| A_23_P42718    | NM_004289       | NFE2L3        |
| A_23_P81441    | NM_130848       | DCANP1        |
| A_24_P120934   | NM_006705       | GADD45G       |
| A_33_P3279629  | NM_033199       | UCN2          |
| A_33_P3489737  | NM_020726       | NLN           |
| A_33_P3767773  | NM_020765       | UBR4          |
| A_22_P00005567 | ENST00000521359 |               |
| A_23_P146058   | NM_001695       | ATP6V1C1      |
| A_24_P148750   | NM_004844       | SH3BP5        |
| A_24_P97342    | NM_021935       | PROK2         |
| A_33_P3399943  | NM_021135       | RPS6KA2       |
| A_22_P00000184 | lnc-ABHD16B-1:1 | lnc-ABHD16B-1 |
| A_19_P00806473 | ENST00000443965 |               |
| A_22_P00009165 | NR_046696       | IPO9-AS1      |
| A_23_P350005   | NM_173553       | TRIML2        |
| A_23_P423237   | NM_000231       | SGCG          |
| A_22_P00006855 | ENST00000554305 |               |
| A_22_P00017762 | NR_036549       | CCNT2-AS1     |
| A_22_P00020016 | ENST00000538329 |               |
| A_23_P103110   | NM_012323       | MAFF          |
| A_23_P87150    | NM_004811       | LPXN          |
| A_33_P3268838  | NM_001288819    | CPEB1         |
| A_22_P00015927 | lnc-TCL1B-2:1   | lnc-TCL1B-2   |
| A_22_P00024094 | lnc-BEST4-1:2   | lnc-BEST4-1   |
| A_23_P108948   | NM_018000       | MREG          |

|    |                |                  |                |
|----|----------------|------------------|----------------|
| 1  |                |                  |                |
| 2  | A_23_P19291    | NM_001069        | TUBB2A         |
| 3  | A_24_P117029   | NM_000527        | LDLR           |
| 4  | A_32_P175739   | NM_000189        | HK2            |
| 5  | A_33_P3222069  | NM_182965        | SPHK1          |
| 6  | A_33_P3224710  | NM_012252        | TFEC           |
| 7  | A_33_P3244956  | NM_020645        | NRIP3          |
| 8  | A_33_P3263387  | NM_014640        | TTLL4          |
| 9  | A_33_P3268466  | NM_004870        | MPDU1          |
| 10 | A_23_P146084   | NM_000637        | GSR            |
| 11 | A_23_P77304    | NM_004644        | AP3B2          |
| 12 | A_21_P0000022  | NM_001159491     | BRI3           |
| 13 | A_22_P00011391 | NR_003929        | PPIEL          |
| 14 | A_23_P69810    | NM_032717        | AGPAT9         |
| 15 | A_23_P92730    | NM_006308        | HSPB3          |
| 16 | A_22_P00003557 | NR_038380        | SLC7A11-AS1    |
| 17 | A_23_P210210   | NM_001430        | EPAS1          |
| 18 | A_23_P93641    | NM_020299        | AKR1B10        |
| 19 | A_33_P3227472  | NM_138432        | SDSL           |
| 20 | A_33_P3390357  | NM_001128626     | SPIRE1         |
| 21 | A_33_P3491294  | NM_015944        | AMDHD2         |
| 22 | A_21_P0000509  | NR_024244        | SNAR-G2        |
| 23 | A_23_P103511   | NM_001085375     | C1orf226       |
| 24 | A_23_P105794   | NM_033255        | EPSTI1         |
| 25 | A_23_P45025    | NM_138980        | MAPK10         |
| 26 | A_23_P70670    | NM_004233        | CD83           |
| 27 | A_32_P106376   | NM_182645        | VGLL2          |
| 28 | A_33_P3281795  | NM_007283        | MGLL           |
| 29 | A_33_P3323803  | NM_014644        | PDE4DIP        |
| 30 | A_33_P3718269  | ENST00000517927  | MIR146A        |
| 31 | A_23_P256231   | NM_032145        | FBXO30         |
| 32 | A_33_P3379922  | NM_000312        | PROC           |
| 33 | A_19_P00317360 | NM_001199182     | ATP2C1         |
| 34 | A_23_P153320   | NM_000201        | ICAM1          |
| 35 | A_23_P254831   | NM_002364        | MAGEB2         |
| 36 | A_23_P90172    | NM_014330        | PPP1R15A       |
| 37 | A_33_P3333982  | NM_022359        | PDE4DIP        |
| 38 | A_33_P3353552  | NM_017842        | SLC48A1        |
| 39 | A_33_P3393796  | NM_020810        | TRMT5          |
| 40 | A_21_P0008800  | ENST00000561362  |                |
| 41 | A_22_P00018083 | NM_152625        | ZNF366         |
| 42 | A_23_P112846   | NM_001144978     | MTHFD2L        |
| 43 | A_23_P47682    | NM_020645        | NRIP3          |
| 44 | A_23_P85209    | NM_000640        | IL13RA2        |
| 45 | A_24_P268676   | NM_003670        | BHLHE40        |
| 46 | A_32_P18258    | NM_006755        | TALDO1         |
| 47 | A_33_P3588134  | NM_052839        | PANX2          |
| 48 | A_21_P0006195  | Inc-C9orf107-2:1 | Inc-C9orf107-2 |
| 49 | A_23_P420942   | XM_005255956     | MT1E           |
| 50 | A_23_P55706    | NM_006509        | RELB           |
| 51 | A_24_P157926   | NM_006290        | TNFAIP3        |

|    |               |                 |               |
|----|---------------|-----------------|---------------|
| 1  |               |                 |               |
| 2  | A_21_P0004569 | NR_103549       | LUCAT1        |
| 3  | A_23_P18672   | NM_020973       | GBA3          |
| 4  | A_33_P3316456 | NM_001200050    | NPL           |
| 5  | A_21_P0001177 | lnc-FAM72C-2:1  | lnc-FAM72C-2  |
| 6  | A_23_P215048  | NM_014702       | KIAA0408      |
| 7  | A_23_P339818  | NM_183376       | ARRDC4        |
| 8  | A_23_P50508   | NM_003706       | PLA2G4C       |
| 9  |               |                 |               |
| 10 | A_33_P3288189 | NM_014899       | RHOBTB3       |
| 11 | A_21_P0000160 | NM_138461       | TM4SF19       |
| 12 | A_23_P101246  | NM_001163922    | VSIG10L       |
| 13 | A_23_P421423  | NM_006291       | TNFAIP2       |
| 14 | A_23_P47077   | NM_004281       | BAG3          |
| 15 | A_33_P3380383 | NM_001099221    | TIFAB         |
| 16 | A_23_P207507  | NM_003786       | ABCC3         |
| 17 | A_23_P77493   | NM_006086       | TUBB3         |
| 18 | A_24_P353638  | NM_021181       | SLAMF7        |
| 19 | A_21_P0004560 | lnc-ZNF366-2:2  | lnc-ZNF366-2  |
| 20 | A_21_P0007070 | lnc-RPP30-2:1   | lnc-RPP30-2   |
| 21 | A_33_P3329013 | NM_001050       | SSTR2         |
| 22 | A_33_P3417695 | NM_001014440    | ODF3B         |
| 23 | A_21_P0000727 | NR_038216       | LINC01010     |
| 24 | A_23_P341223  | NM_014851       | KLHL21        |
| 25 | A_23_P372946  | NM_138461       | TM4SF19       |
| 26 | A_33_P3246985 | NM_022359       | PDE4DIP       |
| 27 | A_33_P3352970 | NM_001570       | IRAK2         |
| 28 | A_33_P3358601 | NM_001170820    | IFITM10       |
| 29 | A_23_P422831  | NM_004816       | FAM189A2      |
| 30 | A_24_P22050   | NM_017817       | RAB20         |
| 31 | A_24_P226008  | NM_007283       | MGLL          |
| 32 | A_32_P214340  | lnc-AKIRIN1-1:2 | lnc-AKIRIN1-1 |
| 33 | A_33_P3414912 | NM_001200056    | NPL           |
| 34 | A_33_P3805090 | NM_020840       | FNIP2         |
| 35 | A_21_P0004423 | lnc-ARRDC3-1:1  | lnc-ARRDC3-1  |
| 36 | A_23_P104471  | NM_001007271    | DUSP13        |
| 37 | A_23_P143857  | NM_052953       | LRRC3B        |
| 38 | A_23_P64721   | NM_006018       | HCAR3         |
| 39 | A_33_P3326992 | NM_014644       | PDE4DIP       |
| 40 | A_33_P3347452 | NM_021135       | RPS6KA2       |
| 41 | A_23_P139786  | NM_003733       | OASL          |
| 42 | A_23_P165624  | NM_007115       | TNFAIP6       |
| 43 | A_23_P206140  | NM_018602       | DNAJA4        |
| 44 | A_23_P90925   | NM_173178       | IL36B         |
| 45 | A_21_P0014570 | lnc-SYCP3-2:1   | lnc-SYCP3-2   |
| 46 | A_23_P305092  | NM_019604       | CRTAM         |
| 47 | A_23_P393620  | NM_006528       | TFPI2         |
| 48 | A_23_P52207   | NM_012342       | BAMBI         |
| 49 | A_33_P3394366 | NM_001256720    | CLEC19A       |
| 50 | A_23_P203888  | NM_002429       | MMP19         |
| 51 | A_24_P879740  | NM_005909       | MAP1B         |
| 52 | A_23_P86330   | NM_016545       | IER5          |

|    |                |                  |                |
|----|----------------|------------------|----------------|
| 1  |                |                  |                |
| 2  | A_24_P239606   | NM_015675        | GADD45B        |
| 3  | A_23_P110712   | NM_004417        | DUSP1          |
| 4  | A_23_P11995    | NM_002574        | PRDX1          |
| 5  | A_23_P372834   | NM_198098        | AQP1           |
| 6  | A_21_P0004568  | ENST00000513626  | LUCAT1         |
| 7  | A_24_P149036   | NM_001387        | DPYSL3         |
| 8  | A_23_P45871    | NM_006820        | IFI44L         |
| 9  | A_24_P270728   | NM_001042483     | NUPR1          |
| 10 | A_33_P3392187  | NM_001080433     | CCDC85A        |
| 11 | A_21_P0004422  | lnc-ARRDC3-1:10  | lnc-ARRDC3-1   |
| 12 | A_21_P0009442  | NR_110429        | LINC01540      |
| 13 | A_32_P187704   | ENST00000521574  | SNTG1          |
| 14 | A_23_P250164   | NM_000187        | HGD            |
| 15 | A_24_P944253   | NM_130446        | KLHL6          |
| 16 | A_33_P3377199  | NM_002574        | PRDX1          |
| 17 | A_22_P00006467 | ENST00000517482  |                |
| 18 | A_32_P74409    | NM_001145033     | C11orf96       |
| 19 | A_22_P00016052 | NR_110429        | LINC01540      |
| 20 | A_33_P3235546  | NM_014747        | RIMS3          |
| 21 | A_23_P139500   | NM_030762        | BHLHE41        |
| 22 | A_23_P142849   | NM_005168        | RND3           |
| 23 | A_23_P39814    | NM_004882        | CIR1           |
| 24 | A_21_P0011877  | ENST00000424010  | LOC102725407   |
| 25 | A_23_P17663    | NM_002462        | MX1            |
| 26 | A_24_P262127   | NM_004165        | RRAD           |
| 27 | A_23_P106002   | NM_020529        | NFKBIA         |
| 28 | A_23_P8196     | NM_002395        | ME1            |
| 29 | A_24_P709377   | NR_015377        | PAX8-AS1       |
| 30 | A_24_P88850    | NM_012219        | MRAS           |
| 31 | A_23_P8906     | NM_013437        | LRP12          |
| 32 | A_33_P3252394  | NM_006705        | GADD45G        |
| 33 | A_22_P00003850 | NM_001278655     | LINC01272      |
| 34 | A_33_P3324004  | NM_032965        | CCL15          |
| 35 | A_21_P0014789  | ENST00000538759  |                |
| 36 | A_19_P00320927 | NR_028415        | LINC00942      |
| 37 | A_33_P3216714  | NM_001256864     | DNAJC6         |
| 38 | A_23_P50146    | NM_213602        | SIGLEC15       |
| 39 | A_33_P3376095  | NM_001040709     | SYPL2          |
| 40 | A_23_P81399    | NM_003900        | SQSTM1         |
| 41 | A_33_P3235053  | NM_033452        | TRIM47         |
| 42 | A_23_P359245   | NM_000245        | MET            |
| 43 | A_21_P0004421  | NR_103548        | LUCAT1         |
| 44 | A_22_P00001519 | lnc-ARHGAP25-1:1 | lnc-ARHGAP25-1 |
| 45 | A_33_P3263867  | NM_002562        | P2RX7          |
| 46 | A_24_P252364   | NM_001037132     | NRCAM          |
| 47 | A_22_P00002121 | ENST00000508202  |                |
| 48 | A_23_P107247   | NM_018896        | CACNA1G        |
| 49 | A_23_P148990   | NM_031935        | HMCN1          |
| 50 | A_24_P156748   | NM_001004434     | SLC30A2        |
| 51 | A_21_P0007321  | lnc-SOX6-1:1     | lnc-SOX6-1     |

|    |                |                 |              |
|----|----------------|-----------------|--------------|
| 1  |                |                 |              |
| 2  | A_33_P3405424  | NM_152899       | IL4I1        |
| 3  | A_22_P00023014 | lnc-MFSD9-4:1   | lnc-MFSD9-4  |
| 4  | A_33_P3371089  | NM_019072       | SGTB         |
| 5  | A_24_P28722    | NM_080657       | RSAD2        |
| 6  | A_23_P398566   | NM_173200       | NR4A3        |
| 7  | A_23_P145114   | NM_001498       | GCLC         |
| 8  | A_33_P3293164  | NM_001275       | CHGA         |
| 9  |                |                 |              |
| 10 | A_21_P0004055  | NR_104999       | LOC102467226 |
| 11 | A_22_P00008960 | NR_026796       | LINC00520    |
| 12 | A_23_P129903   | NM_001037330    | TRIM16L      |
| 13 | A_24_P163237   | NM_020225       | STOX2        |
| 14 | A_21_P0014368  | ENST00000596510 | PLA2G4C      |
| 15 | A_21_P0013393  | ENST00000415536 | LOC102723946 |
| 16 | A_23_P52266    | NM_001548       | IFIT1        |
| 17 | A_23_P119478   | NM_005755       | EBI3         |
| 18 | A_24_P226970   | NM_014951       | ZNF365       |
| 19 |                |                 |              |
| 20 | A_33_P3331831  | ENST00000612156 |              |
| 21 | A_22_P00011370 | ENST00000328963 | P2RX7        |
| 22 | A_23_P90062    | NM_006145       | DNAJB1       |
| 23 | A_21_P0004566  | lnc-ARRDC3-1:6  | lnc-ARRDC3-1 |
| 24 | A_23_P137016   | NM_002970       | SAT1         |
| 25 | A_23_P375165   | NM_207459       | TEX19        |
| 26 | A_33_P3336720  | NM_021175       | HAMP         |
| 27 | A_33_P3371718  | NM_002970       | SAT1         |
| 28 | A_23_P23815    | NM_021194       | SLC30A1      |
| 29 | A_23_P132956   | NM_004181       | UCHL1        |
| 30 | A_24_P133253   | NM_000899       | KITLG        |
| 31 | A_33_P3212804  | NM_001010859    | C22orf42     |
| 32 | A_33_P3216292  | NM_001267571    | TBC1D2       |
| 33 | A_23_P125078   | NM_173626       | SLC26A11     |
| 34 | A_33_P3692979  | AK093862        | LOC283485    |
| 35 | A_23_P137035   | NM_003662       | PIR          |
| 36 | A_33_P3351120  | NM_001261445    | TXNRD1       |
| 37 | A_24_P131589   | NM_006889       | CD86         |
| 38 | A_22_P00006112 | NR_109825       | NR2F1-AS1    |
| 39 | A_22_P00022529 | XR_242166       | LOC101928716 |
| 40 | A_23_P256948   | NM_005098       | MSC          |
| 41 | A_23_P349566   | NM_001080433    | CCDC85A      |
| 42 | A_33_P3361422  | NM_000784       | CYP27A1      |
| 43 | A_19_P00800206 | NR_036586       | LOC400958    |
| 44 | A_23_P17065    | NM_004591       | CCL20        |
| 45 | A_32_P228167   | NM_152589       | C12orf50     |
| 46 | A_21_P0001923  | ENST00000450667 |              |
| 47 | A_22_P00023255 | ENST00000438158 |              |
| 48 | A_23_P83200    | NM_152572       | AK8          |
| 49 | A_23_P336992   | NM_182491       | ZFAND2A      |
| 50 | A_21_P0004750  | lnc-SUPT3H-1:5  | lnc-SUPT3H-1 |
| 51 | A_23_P215913   | NM_001831       | CLU          |
| 52 | A_24_P206776   | NM_001885       | CRYAB        |
| 53 | A_23_P127948   | NM_001124       | ADM          |

|    |                |                 |               |
|----|----------------|-----------------|---------------|
| 1  |                |                 |               |
| 2  | A_33_P3449097  | NM_001290212    | TSPAN10       |
| 3  | A_33_P3354607  | NM_001291470    | CCL4L2        |
| 4  | A_19_P00809119 | NR_015410       | CASC15        |
| 5  | A_23_P210465   | NM_002638       | PI3           |
| 6  | A_21_P0004561  | lnc-ZNF366-2:3  | lnc-ZNF366-2  |
| 7  | A_33_P3846177  | NM_001478       | B4GALNT1      |
| 8  | A_23_P102000   | NM_001008540    | CXCR4         |
| 9  | A_23_P2645     | NM_006843       | SDS           |
| 10 | A_23_P207564   | NM_001291470    | CCL4L2        |
| 11 | A_24_P68908    | NR_033752       | LOC344887     |
| 12 | A_22_P00009106 | NR_046848       | FAM155A-IT1   |
| 13 | A_23_P343398   | NM_001838       | CCR7          |
| 14 | A_23_P328740   | NM_001285486    | NEURL3        |
| 15 | A_23_P321501   | NM_182908       | DHRS2         |
| 16 | A_23_P80974    | NM_005651       | TDO2          |
| 17 | A_21_P0004140  | NR_105007       | LOC102477328  |
| 18 | A_32_P189781   | NR_026796       | LINC00520     |
| 19 | A_33_P3342628  | NM_021170       | HES4          |
| 20 | A_23_P134176   | NM_001024465    | SOD2          |
| 21 | A_24_P183150   | NM_002090       | CXCL3         |
| 22 | A_33_P3276703  | NM_003378       | VGf           |
| 23 | A_23_P55270    | NM_002988       | CCL18         |
| 24 | A_23_P145096   | NM_005084       | PLA2G7        |
| 25 | A_21_P0004928  | lnc-NT5DC1-4:1  | lnc-NT5DC1-4  |
| 26 | A_33_P3330264  | NM_001511       | CXCL1         |
| 27 | A_21_P0009476  | lnc-KATNAL2-4:1 | lnc-KATNAL2-4 |
| 28 | A_23_P77415    | NM_182981       | OSGIN1        |
| 29 | A_24_P349196   | NM_001080850    | CCDC30        |
| 30 | A_23_P320113   | NM_080725       | SRXN1         |
| 31 | A_23_P358597   | NM_022361       | POPDC3        |
| 32 | A_24_P257416   | NM_002089       | CXCL2         |
| 33 | A_23_P214079   | NM_003122       | SPINK1        |
| 34 | A_21_P0008216  | lnc-ANKRD10-1:1 | lnc-ANKRD10-1 |
| 35 | A_24_P228130   | NM_001001437    | CCL3L3        |
| 36 | A_33_P3296181  | NM_001001437    | CCL3L3        |
| 37 | A_23_P120883   | NM_002133       | HMOX1         |
| 38 | A_23_P7144     | NM_001511       | CXCL1         |
| 39 | A_33_P3316273  | NM_002983       | CCL3          |
| 40 | A_33_P3242623  | NM_014331       | SLC7A11       |
| 41 | A_23_P111132   | NM_005345       | HSPA1A        |
| 42 | A_23_P315364   | NM_002089       | CXCL2         |
| 43 | A_23_P54840    | NM_005946       | MT1A          |
| 44 | A_23_P365738   | NM_015193       | ARC           |
| 45 | A_23_P15174    | NM_005949       | MT1F          |
| 46 | A_33_P3415430  | NM_005346       | HSPA1B        |
| 47 | A_22_P00010235 | NM_005947       | MT1B          |
| 48 | A_23_P427703   | NR_001447       | MT1L          |
| 49 | A_23_P37983    | NM_005947       | MT1B          |
| 50 | A_33_P3315314  | NM_001276687    | MT1HL1        |
| 51 | A_33_P3231156  | ENST00000567054 |               |



|    |                |                  |                |
|----|----------------|------------------|----------------|
| 1  |                |                  |                |
| 2  | A_32_P87013    | NM_000584        | CXCL8          |
| 3  | A_21_P0000671  | NM_175617        | MT1E           |
| 4  | A_23_P206724   | NM_175617        | MT1E           |
| 5  | A_33_P3382331  | NM_002155        | HSPA6          |
| 6  | A_33_P3368313  | NM_005951        | MT1H           |
| 7  | A_33_P3236868  | NM_005952        | MT1X           |
| 8  | A_23_P66241    | NM_176870        | MT1M           |
| 9  | A_33_P3233645  | NM_001301267     | MT1G           |
| 10 | A_23_P114903   | NM_002155        | HSPA6          |
| 11 | A_23_P44836    | NM_022908        | NT5DC2         |
| 12 | A_33_P3270489  | NM_025059        | CCDC170        |
| 13 | A_32_P36694    | NM_175061        | JAZF1          |
| 14 | A_23_P255376   | NM_017918        | CCDC109B       |
| 15 | A_23_P215525   | NM_015550        | OSBPL3         |
| 16 | A_23_P216108   | NM_000037        | ANK1           |
| 17 | A_19_P00811178 | NR_024607        | MIR503HG       |
| 18 | A_23_P22096    | NM_153831        | PTK2           |
| 19 | A_22_P00015017 | lnc-SMPD2-1:1    | lnc-SMPD2-1    |
| 20 | A_23_P411723   | NM_002655        | PLAG1          |
| 21 | A_33_P3276918  | NM_001195228     | FAM64A         |
| 22 | A_23_P130113   | NM_080912        | ASGR2          |
| 23 | A_23_P143885   | NM_019555        | ARHGEF3        |
| 24 | A_23_P126540   | NM_020683        | TMIGD3         |
| 25 | A_23_P35444    | NM_032727        | INA            |
| 26 | A_23_P64372    | NM_001062        | TCN1           |
| 27 | A_22_P00024463 | lnc-ARHGAP25-1:2 | lnc-ARHGAP25-1 |
| 28 | A_23_P256470   | NM_000905        | NPY            |
| 29 | A_33_P3215487  | NM_014855        | AP5Z1          |
| 30 | A_33_P3375934  | NM_005746        | NAMPT          |
| 31 | A_23_P152002   | NM_004049        | BCL2A1         |
| 32 | A_23_P60248    | NM_003329        | TXN            |
| 33 | A_24_P30194    | NM_012420        | IFIT5          |
| 34 | A_23_P209232   | NM_024692        | CLIP4          |
| 35 | A_23_P63209    | NM_181755        | HSD11B1        |
| 36 | A_33_P3262020  | NM_000606        | C8G            |
| 37 | A_33_P6816999  | NR_027007        | THUMPD3-AS1    |
| 38 | A_23_P134109   | NM_001431        | EPB41L2        |
| 39 | A_24_P691826   | ENST00000587298  | WFDC21P        |
| 40 | A_21_P0000491  | NR_004383        | SNAR-G1        |
| 41 | A_24_P237586   | NM_181726        | ANKRD37        |
| 42 | A_33_P3265270  | NM_012434        | SLC17A5        |
| 43 | A_24_P418408   | NM_198552        | FAM89A         |
| 44 | A_33_P3228612  | NM_001205293     | CACNA1E        |
| 45 | A_23_P106874   | NM_031293        | PMFBP1         |
| 46 | A_23_P155463   | NM_024512        | LRRC2          |
| 47 | A_24_P389415   | NM_007257        | PNMA2          |
| 48 | A_24_P18105    | NM_032466        | ASPH           |
| 49 | A_22_P00016053 | NR_110428        | LINC01540      |
| 50 | A_33_P3284463  | NM_177924        | ASAH1          |
| 51 | A_23_P74290    | NM_052942        | GBP5           |



|    |                |                 |              |
|----|----------------|-----------------|--------------|
| 1  |                |                 |              |
| 2  | A_23_P407096   | NM_152625       | ZNF366       |
| 3  | A_23_P257043   | NM_005261       | GEM          |
| 4  | A_21_P0001708  | Inc-HMCN1-2:2   | Inc-HMCN1-2  |
| 5  | A_33_P3289251  | AK095971        | LOC644727    |
| 6  | A_23_P6263     | NM_002463       | MX2          |
| 7  | A_33_P3348752  | NM_006644       | HSPH1        |
| 8  | A_33_P3375368  | NM_001195381    | GPR35        |
| 9  | A_33_P3230788  | ENST00000374439 | MUSK         |
| 10 | A_33_P3219090  | NM_005542       | INSIG1       |
| 11 | A_33_P3243230  | THC2544321      |              |
| 12 | A_23_P165333   | NM_139346       | BIN1         |
| 13 | A_23_P112774   | NM_032611       | PTP4A3       |
| 14 | A_23_P143621   | NM_001887       | CRYBB1       |
| 15 | A_33_P3263217  | NM_022143       | LRRC4        |
| 16 | A_23_P83028    | NM_021111       | RECK         |
| 17 | A_23_P346093   | NM_152468       | TMC8         |
| 18 | A_23_P21436    | NM_015651       | PHF19        |
| 19 | A_33_P3387616  | NM_052924       | RHPN1        |
| 20 | A_23_P57588    | NM_016426       | GTSE1        |
| 21 | A_33_P3562537  | NM_020630       | RET          |
| 22 | A_23_P250735   | NM_175709       | CBX7         |
| 23 | A_32_P175539   | NM_002902       | RCN2         |
| 24 | A_23_P90679    | NM_018571       | STRADB       |
| 25 | A_33_P3423570  | NM_024042       | METRNL       |
| 26 | A_23_P28638    | NM_017958       | PLEKHB2      |
| 27 | A_22_P00011361 | ENST00000577661 |              |
| 28 | A_22_P00015390 | Inc-SRGAP3-1:21 | Inc-SRGAP3-1 |
| 29 | A_24_P365025   | NM_003971       | SPAG9        |
| 30 | A_33_P3354564  | NM_001083112    | GPD2         |
| 31 | A_22_P00020742 | XR_241131       | LOC101928101 |
| 32 | A_24_P54390    | NM_170672       | RASGRP3      |
| 33 | A_24_P349547   | ENST00000546724 |              |
| 34 | A_24_P77082    | NM_003679       | KMO          |
| 35 | A_23_P128372   | NM_002014       | FKBP4        |
| 36 | A_33_P3420013  |                 |              |
| 37 | A_22_P00016986 | Inc-TTC23-2:1   | Inc-TTC23-2  |
| 38 | A_23_P98350    | NM_001165       | BIRC3        |
| 39 | A_23_P100141   | NM_001193388    | UNKL         |
| 40 | A_33_P3744415  | ENST00000431422 | LINC01010    |
| 41 | A_23_P138194   | NM_000433       | NCF2         |
| 42 | A_33_P3291454  | NM_198515       | CCDC172      |
| 43 | A_23_P146146   | NM_152565       | ATP6V0D2     |
| 44 | A_23_P369899   | NM_015444       | TMEM158      |
| 45 | A_19_P00320067 | NR_026874       | LOC100130417 |
| 46 | A_24_P97374    | NM_005442       | EOMES        |
| 47 | A_33_P3214159  | NM_001792       | CDH2         |
| 48 | A_22_P00001149 | ENST00000547851 | PCED1B-AS1   |
| 49 | A_23_P111452   | NM_031946       | AGAP3        |
| 50 | A_23_P126584   | NM_005894       | CD5L         |
| 51 | A_23_P23947    | NM_005204       | MAP3K8       |

|    |                |                 |              |
|----|----------------|-----------------|--------------|
| 1  |                |                 |              |
| 2  | A_33_P3301010  | NM_001128626    | SPIRE1       |
| 3  | A_33_P3421728  | NM_001346       | DGKG         |
| 4  | A_33_P3215953  | NM_024569       | MPZL1        |
| 5  | A_33_P3413840  | NM_001205019    | GK           |
| 6  | A_23_P134085   | NM_173515       | CNKS3        |
| 7  | A_21_P0000507  | NR_024230       | SNAR-B2      |
| 8  | A_19_P00321361 | NR_109851       | LINC-PINT    |
| 9  | A_24_P304071   | NM_001547       | IFIT2        |
| 10 | A_33_P3231447  | NM_000210       | ITGA6        |
| 11 | A_21_P0007854  | lnc-HNF1A-1:4   | lnc-HNF1A-1  |
| 12 | A_24_P286054   | NM_001105251    | ZFYVE16      |
| 13 | A_33_P3298861  | NM_024628       | SLC12A8      |
| 14 | A_32_P33083    | NM_016378       | VCX2         |
| 15 | A_32_P31618    | NM_000637       | GSR          |
| 16 | A_33_P3286151  | NR_033651       | LOC100132891 |
| 17 | A_22_P00014843 | ENST00000550684 |              |
| 18 | A_24_P29723    | NM_000941       | POR          |
| 19 | A_33_P3333232  | ENST00000621947 | CCDC162P     |
| 20 | A_23_P7313     | NM_001040058    | SPP1         |
| 21 | A_24_P217572   | NM_001957       | EDNRA        |
| 22 | A_32_P62997    | NM_018492       | PBK          |
| 23 | A_24_P38276    | NM_003505       | FZD1         |
| 24 | A_24_P873414   | NM_001267062    | PLEKHB2      |
| 25 | A_24_P309594   | NM_017842       | SLC48A1      |
| 26 | A_33_P3354940  | NM_000757       | CSF1         |
| 27 | A_24_P378019   | NM_004031       | IRF7         |
| 28 | A_33_P3398912  | NM_017585       | SLC2A6       |
| 29 | A_23_P126278   | NM_003465       | CHIT1        |
| 30 | A_32_P49844    | NM_012249       | RHOQ         |
| 31 | A_33_P3414907  | NM_001200050    | NPL          |
| 32 | A_23_P4662     | NM_005178       | BCL3         |
| 33 | A_24_P124349   | NM_025208       | PDGFD        |
| 34 | A_24_P328524   | NM_003947       | KALRN        |
| 35 | A_23_P100022   | NM_014848       | SV2B         |
| 36 | A_23_P157795   | NM_003798       | CTNNA1       |
| 37 | A_33_P3271445  | NM_001130105    | COL4A3BP     |
| 38 | A_23_P69383    | NM_031458       | PARP9        |
| 39 | A_23_P110196   | NM_016323       | HERC5        |
| 40 | A_33_P3329769  | NM_152731       | BEND6        |
| 41 | A_23_P819      | NM_005101       | ISG15        |
| 42 | A_21_P0000508  | NR_024243       | SNAR-D       |
| 43 | A_23_P417918   | NM_006211       | PENK         |
| 44 | A_21_P0000511  | NR_024342       | SNAR-H       |
| 45 | A_23_P133691   | NM_021244       | RRAGD        |
| 46 | A_32_P184394   | NM_012252       | TFEC         |
| 47 | A_19_P00322407 | NR_034115       | STXBP5-AS1   |
| 48 | A_24_P304154   | NM_001025390    | AMPD3        |
| 49 | A_33_P3227375  | NM_003247       | THBS2        |
| 50 | A_23_P143902   | NM_022788       | P2RY12       |
| 51 | A_24_P131522   | NM_032208       | ANTXR1       |

|    |                |                 |                |
|----|----------------|-----------------|----------------|
| 1  |                |                 |                |
| 2  | A_21_P0000064  | NM_006665       | HPSE           |
| 3  | A_23_P154065   | NM_006000       | TUBA4A         |
| 4  | A_33_P3338166  | NM_030952       | NUAK2          |
| 5  | A_23_P113351   | NM_004684       | SPARCL1        |
| 6  | A_33_P3297255  | NM_031300       | MXD3           |
| 7  |                |                 |                |
| 8  | A_21_P0006685  | ENST00000441348 |                |
| 9  | A_21_P0005169  | Inc-CRISP2-1:1  | Inc-CRISP2-1   |
| 10 | A_23_P52101    | NM_016243       | CYB5R1         |
| 11 | A_23_P19624    | NM_001718       | BMP6           |
| 12 |                |                 |                |
| 13 | A_23_P50504    | NM_000146       | FTL            |
| 14 | A_24_P274270   | NM_139266       | STAT1          |
| 15 | A_33_P3358745  | NM_001093726    | SEPP1          |
| 16 | A_22_P00008494 | NR_002798       | NAPSB          |
| 17 | A_23_P100963   | NM_182538       | SPNS3          |
| 18 |                |                 |                |
| 19 | A_21_P0013038  | TCONS_I2_000244 | XLOC_I2_012727 |
| 20 | A_23_P425880   | NM_007118       | TRIO           |
| 21 | A_23_P255104   | NM_005779       | LHFPL2         |
| 22 | A_23_P131208   | NM_006186       | NR4A2          |
| 23 | A_24_P128205   | NM_002807       | PSMD1          |
| 24 |                |                 |                |
| 25 | A_24_P33895    | NM_001040619    | ATF3           |
| 26 | A_32_P155247   | NM_000146       | FTL            |
| 27 | A_22_P00003544 | ENST00000429730 |                |
| 28 | A_23_P259442   | NM_001873       | CPE            |
| 29 | A_33_P3294440  | ENST00000422819 | CCDC162P       |
| 30 |                |                 |                |
| 31 | A_22_P00022843 | NR_046683       | ST3GAL6-AS1    |
| 32 | A_24_P335305   | NM_006187       | OAS3           |
| 33 | A_23_P134454   | NM_001753       | CAV1           |
| 34 | A_22_P00008493 | NR_002798       | NAPSB          |
| 35 | A_24_P289178   | NM_206967       | C16orf74       |
| 36 | A_23_P137470   | NM_020808       | SIPA1L2        |
| 37 |                |                 |                |
| 38 | A_33_P3367332  | NM_001195736    | FAM213B        |
| 39 | A_23_P90419    | NM_025245       | PBX4           |
| 40 | A_23_P35725    | NM_031418       | ANO3           |
| 41 | A_33_P3700794  | NM_005371       | METTL1         |
| 42 | A_23_P24723    | NM_016464       | TMEM138        |
| 43 | A_24_P278172   | NM_006007       | ZFAND5         |
| 44 | A_24_P270460   | NM_005532       | IFI27          |
| 45 |                |                 |                |
| 46 | A_21_P0000573  | NR_028595       | CCDC162P       |
| 47 | A_24_P172481   | NM_006074       | TRIM22         |
| 48 | A_23_P43107    | NM_030788       | DCSTAMP        |
| 49 |                |                 |                |
| 50 | A_33_P3284453  | NM_001012279    | SOGA3          |
| 51 | A_33_P3408877  |                 |                |
| 52 | A_23_P214222   | ENST00000612661 | MARCKS         |
| 53 | A_23_P1691     | NM_002421       | MMP1           |
| 54 | A_24_P355145   | NM_033105       | DNAJC5B        |
| 55 |                |                 |                |
| 56 | A_22_P00009996 | ENST00000612330 |                |
| 57 | A_23_P251075   | NM_005491       | MAMLD1         |
| 58 | A_19_P00316564 | NR_034179       | LOC653712      |
| 59 | A_33_P3590259  | NM_004887       | CXCL14         |
| 60 | A_23_P33723    | NM_004244       | CD163          |

|    |                |                 |              |
|----|----------------|-----------------|--------------|
| 1  |                |                 |              |
| 2  | A_21_P0013322  | NM_001287062    | RABGEF1      |
| 3  | A_32_P32254    | NM_001848       | COL6A1       |
| 4  | A_23_P213385   | NM_006317       | BASP1        |
| 5  | A_24_P11506    | NM_001032998    | KYNU         |
| 6  | A_21_P0003325  | ENST00000514265 |              |
| 7  |                |                 |              |
| 8  | A_33_P3225022  | NM_206965       | FTCD         |
| 9  | A_23_P126623   | NM_002631       | PGD          |
| 10 | A_23_P1043     | NM_018265       | C1orf106     |
| 11 | A_24_P377499   | NM_015550       | OSBPL3       |
| 12 | A_23_P3371     | NM_002891       | RASGRF1      |
| 13 |                |                 |              |
| 14 | A_22_P00004951 | NR_046683       | ST3GAL6-AS1  |
| 15 | A_24_P303091   | NM_001565       | CXCL10       |
| 16 | A_23_P167096   | NM_005429       | VEGFC        |
| 17 | A_23_P128281   | NM_007333       | KLRC3        |
| 18 | A_33_P3367301  | NM_152219       | GJD3         |
| 19 | A_23_P73097    | NM_170587       | RGS20        |
| 20 |                |                 |              |
| 21 | A_23_P214821   | NM_001955       | EDN1         |
| 22 | A_23_P217269   | NM_007268       | VSIG4        |
| 23 | A_33_P3360728  | NM_000713       | BLVRB        |
| 24 | A_23_P51646    | NM_004073       | PLK3         |
| 25 | A_24_P945283   | NM_021120       | DLG3         |
| 26 | A_23_P1552     | NM_001814       | CTSC         |
| 27 | A_23_P388812   | ENST00000435431 | CKAP2L       |
| 28 |                |                 |              |
| 29 | A_24_P74932    | NM_002668       | PLP2         |
| 30 | A_33_P3354322  | NM_201397       | GPX1         |
| 31 | A_23_P209678   | NM_002664       | PLEK         |
| 32 | A_23_P8311     | NM_016614       | TDP2         |
| 33 | A_23_P143906   | NM_022443       | MLF1         |
| 34 | A_23_P146572   | NM_015392       | NPDC1        |
| 35 | A_24_P941268   | NM_007220       | CA5B         |
| 36 | A_24_P96961    | NM_025106       | SPSB1        |
| 37 | A_33_P3272563  | NM_004808       | NMT2         |
| 38 | A_33_P3284508  | NM_001174104    | CD14         |
| 39 | A_24_P79755    | NM_006066       | AKR1A1       |
| 40 | A_23_P94230    | NM_015364       | LY96         |
| 41 | A_33_P3225512  | NM_002535       | OAS2         |
| 42 | A_19_P00812340 | NM_000146       | FTL          |
| 43 | A_22_P00018123 | lnc-ZNF484-1:1  | lnc-ZNF484-1 |
| 44 | A_23_P50535    | NM_004409       | DMPK         |
| 45 | A_24_P145066   | NM_183416       | KIF1B        |
| 46 | A_23_P200728   | NM_000569       | FCGR3A       |
| 47 | A_24_P318656   | NM_000212       | ITGB3        |
| 48 | A_32_P135336   | NR_002556       | LOC388242    |
| 49 | A_21_P0014091  | BG218553        |              |
| 50 | A_23_P390116   | NM_153023       | SPATA13      |
| 51 | A_33_P3390172  | NM_001145271    | ADAMDEC1     |
| 52 | A_24_P402690   | NM_030926       | ITM2C        |
| 53 | A_22_P00018437 | ENST00000512245 |              |
| 54 | A_23_P404481   | NM_001400       | S1PR1        |
| 55 | A_33_P3343442  | NM_001278559    | ZNF316       |
| 56 |                |                 |              |
| 57 |                |                 |              |
| 58 |                |                 |              |
| 59 |                |                 |              |
| 60 |                |                 |              |

|    |                |                 |              |
|----|----------------|-----------------|--------------|
| 1  |                |                 |              |
| 2  | A_33_P3242099  | NM_001297707    | CAMSAP2      |
| 3  | A_24_P8454     | NM_001130528    | SPAG9        |
| 4  | A_33_P3369393  | NM_000265       | NCF1         |
| 5  | A_23_P15146    | NM_001012631    | IL32         |
| 6  | A_23_P36882    | NM_006183       | NTS          |
| 7  |                |                 |              |
| 8  | A_33_P3333317  | NM_001008211    | OPTN         |
| 9  | A_23_P423309   | NM_016580       | PCDH12       |
| 10 | A_23_P500614   | NM_001243       | TNFRSF8      |
| 11 | A_24_P256380   | NM_024911       | WLS          |
| 12 | A_24_P214858   | NM_024807       | TREML2       |
| 13 |                |                 |              |
| 14 | A_33_P3283611  | NM_001289758    | IFIT3        |
| 15 | A_23_P312874   | NM_145026       | SPATS1       |
| 16 | A_24_P227831   | NM_004996       | ABCC1        |
| 17 | A_33_P3393927  | NM_181873       | MTMR11       |
| 18 | A_23_P200222   | NM_033300       | LRP8         |
| 19 |                |                 |              |
| 20 | A_22_P00025954 | NR_125989       | LOC101929771 |
| 21 | A_24_P20630    | NM_016269       | LEF1         |
| 22 | A_33_P3237674  | ENST00000613353 |              |
| 23 | A_24_P165423   | NM_052960       | RBP7         |
| 24 | A_23_P342131   | NM_153611       | CYB561A3     |
| 25 |                |                 |              |
| 26 | A_21_P0012769  | ENST00000506292 | LOC102724794 |
| 27 | A_23_P204751   | NM_020039       | ASIC1        |
| 28 | A_33_P3259203  | ENST00000375353 | TMEM255B     |
| 29 | A_23_P24616    | NM_170601       | SIAE         |
| 30 | A_23_P139654   | NM_007328       | KLRC1        |
| 31 | A_23_P207600   | NM_002815       | PSMD11       |
| 32 | A_23_P217319   | NM_004114       | FGF13        |
| 33 |                |                 |              |
| 34 | A_32_P171061   | NM_005170       | ASCL2        |
| 35 | A_23_P122976   | NM_002069       | GNAI1        |
| 36 | A_24_P37409    | NM_004418       | DUSP2        |
| 37 | A_23_P201939   | NM_005167       | PPM1J        |
| 38 | A_23_P118834   | NM_001067       | TOP2A        |
| 39 |                |                 |              |
| 40 | A_21_P0000515  | NR_026705       | VTRNA1-3     |
| 41 | A_23_P127495   | NM_003986       | BBOX1        |
| 42 | A_23_P48835    | NM_138555       | KIF23        |
| 43 | A_33_P3399768  | NR_034126       | LINC01160    |
| 44 | A_24_P4705     | NM_016147       | PPME1        |
| 45 | A_23_P99540    | NM_004926       | ZFP36L1      |
| 46 |                |                 |              |
| 47 | A_22_P00023030 | ENST00000509548 |              |
| 48 | A_23_P99906    | NM_199330       | HOMER2       |
| 49 | A_23_P164047   | NM_012329       | MMD          |
| 50 |                |                 |              |
| 51 | A_32_P8813     | NR_024433       | LINC00926    |
| 52 | A_23_P214026   | NM_001999       | FBN2         |
| 53 | A_23_P167389   | NM_022481       | ARAP3        |
| 54 | A_23_P200096   | NM_025106       | SPSB1        |
| 55 | A_33_P3401428  | NM_018112       | TMEM38B      |
| 56 | A_33_P3249414  | NM_015431       | TRIM58       |
| 57 | A_23_P62115    | NM_003254       | TIMP1        |
| 58 |                |                 |              |
| 59 | A_23_P85240    | NM_016562       | TLR7         |
| 60 | A_23_P7827     | NM_001010919    | FAM26F       |

|    |                |                 |               |
|----|----------------|-----------------|---------------|
| 1  |                |                 |               |
| 2  | A_23_P168556   | NM_004603       | STX1A         |
| 3  | A_23_P334857   | NM_152520       | ZNF385B       |
| 4  | A_23_P84448    | NM_006000       | TUBA4A        |
| 5  | A_21_P0001070  | ENST00000445339 | LOC101927532  |
| 6  | A_33_P3358397  | NM_018176       | LGI2          |
| 7  | A_23_P94552    | NM_013390       | TMEM2         |
| 8  | A_23_P164691   | NM_002162       | ICAM3         |
| 9  | A_23_P158318   | NM_004560       | ROR2          |
| 10 | A_33_P3502037  | NM_012124       | CHORDC1       |
| 11 | A_23_P31844    | NM_001693       | ATP6V1B2      |
| 12 | A_24_P330263   | NM_003991       | EDNRB         |
| 13 | A_23_P42746    | NM_000265       | NCF1          |
| 14 | A_32_P71788    | NM_002014       | FKBP4         |
| 15 | A_23_P210176   | NM_000210       | ITGA6         |
| 16 | A_23_P68669    | NM_024944       | CHODL         |
| 17 | A_33_P3415445  | NM_006609       | MAP3K2        |
| 18 | A_33_P3336038  |                 |               |
| 19 | A_33_P3211432  | NM_000265       | NCF1          |
| 20 | A_23_P408285   | NM_153026       | PRICKLE1      |
| 21 | A_21_P0000102  | NM_001190470    | MTRNR2L2      |
| 22 | A_33_P3380457  | NM_022049       | GPR88         |
| 23 | A_33_P3236020  | NM_138379       | TIMD4         |
| 24 | A_23_P134426   | NM_001005340    | GPNMB         |
| 25 | A_33_P3380056  | NM_001198807    | MSANTD3       |
| 26 | A_33_P3396089  | NM_153811       | SLC38A6       |
| 27 | A_23_P119337   | NM_012068       | ATF5          |
| 28 | A_23_P116512   | NM_024841       | PRR5L         |
| 29 | A_23_P30254    | NM_006622       | PLK2          |
| 30 | A_33_P3228322  | NM_173042       | IL18BP        |
| 31 | A_23_P93032    | NM_032367       | ZBED3         |
| 32 | A_22_P00007487 | NM_001256424    | GUCY1A2       |
| 33 | A_32_P70158    | NM_006864       | LILRB3        |
| 34 | A_22_P00013790 | NR_024281       | LINC00599     |
| 35 | A_23_P88331    | NM_014750       | DLGAP5        |
| 36 | A_23_P3221     | NM_021199       | SQRDL         |
| 37 | A_22_P00014416 | ENST00000448074 | TCTEX1D1      |
| 38 | A_23_P218058   | NM_013431       | KLRC4         |
| 39 | A_23_P72961    | NM_002764       | PRPS1         |
| 40 | A_23_P159305   | NM_139215       | TAF15         |
| 41 | A_23_P370625   | NM_020451       | SEPN1         |
| 42 | A_33_P3413741  | NM_000916       | OXTR          |
| 43 | A_22_P00014477 | Inc-SHARPIN-2:1 | Inc-SHARPIN-2 |
| 44 | A_33_P3298105  | NM_001286792    | SPATA13       |
| 45 | A_33_P3269803  | NM_014718       | CLSTN3        |
| 46 | A_21_P0000397  | NR_003139       | SCARNA18      |
| 47 | A_33_P3394075  | NM_006912       | RIT1          |
| 48 | A_23_P216023   | NM_001146       | ANGPT1        |
| 49 | A_32_P8221     | NM_000845       | GRM8          |
| 50 | A_23_P202156   | NM_001288724    | NFKB2         |
| 51 | A_21_P0012080  | ENST00000437561 |               |

|    |                |                   |                   |
|----|----------------|-------------------|-------------------|
| 1  |                |                   |                   |
| 2  | A_23_P42257    | NM_003897         | IER3              |
| 3  | A_33_P3389728  | NM_205860         | NR5A2             |
| 4  | A_21_P0000492  | NR_004384         | SNAR-F            |
| 5  | A_24_P393958   | NM_007034         | DNAJB4            |
| 6  | A_33_P3310189  | NM_000684         | ADRB1             |
| 7  |                |                   |                   |
| 8  | A_21_P0011609  | XM_005275830      | LOC100130520      |
| 9  | A_23_P150693   | NM_014344         | FJX1              |
| 10 | A_23_P32404    | NM_002201         | ISG20             |
| 11 | A_23_P254756   | NM_006016         | CD164             |
| 12 |                |                   |                   |
| 13 | A_23_P76538    | NM_017899         | TESC              |
| 14 | A_23_P426663   | NM_198159         | MITF              |
| 15 | A_23_P113572   | NM_001770         | CD19              |
| 16 | A_23_P138125   | NM_005449         | FAIM3             |
| 17 | A_23_P48596    | NM_198232         | RNASE1            |
| 18 |                |                   |                   |
| 19 | A_24_P363408   | NM_012259         | HEY2              |
| 20 | A_22_P00024092 | NM_153811         | SLC38A6           |
| 21 | A_33_P3587376  | NR_024214         | SNAR-A3           |
| 22 | A_23_P324754   | NM_018689         | CEMIP             |
| 23 | A_33_P3303649  | NM_203377         | MB                |
| 24 | A_33_P3214105  | NM_001674         | ATF3              |
| 25 |                |                   |                   |
| 26 | A_23_P18939    | NM_002890         | RASA1             |
| 27 | A_23_P93562    | NM_014454         | SESN1             |
| 28 | A_23_P354805   | NM_007249         | KLF12             |
| 29 |                |                   |                   |
| 30 | A_22_P00006100 | ENST00000495363   |                   |
| 31 | A_23_P213584   | NM_002115         | HK3               |
| 32 | A_23_P99442    | NM_004119         | FLT3              |
| 33 | A_33_P3338733  | NM_198159         | MITF              |
| 34 | A_32_P44394    | NM_004833         | AIM2              |
| 35 | A_24_P354689   | NM_004598         | SPOCK1            |
| 36 |                |                   |                   |
| 37 | A_23_P148410   | NM_031894         | FTHL17            |
| 38 | A_33_P3372004  | NM_005849         | IGSF6             |
| 39 | A_21_P0006090  | ENST00000423380   |                   |
| 40 | A_23_P106844   | NM_005953         | MT2A              |
| 41 | A_23_P22444    | NM_002621         | CFP               |
| 42 |                |                   |                   |
| 43 | A_33_P3274397  | NM_001145414      | CHM               |
| 44 | A_22_P00004191 | XR_246017         | LOC101928617      |
| 45 | A_33_P3353791  | NM_181501         | ITGA1             |
| 46 | A_22_P00011268 | lnc-OR51B4-3:1    | lnc-OR51B4-3      |
| 47 | A_24_P63522    | NM_002130         | HMGCS1            |
| 48 |                |                   |                   |
| 49 | A_22_P00018422 | ENST00000485770   |                   |
| 50 | A_32_P190303   | NM_198461         | LONRF2            |
| 51 | A_33_P3364646  | NM_152545         | RASGEF1B          |
| 52 | A_23_P23048    | NM_002965         | S100A9            |
| 53 | A_24_P368575   | NM_003615         | SLC4A7            |
| 54 |                |                   |                   |
| 55 | A_23_P156284   | NM_080881         | DBN1              |
| 56 | A_33_P3423551  | NM_003897         | IER3              |
| 57 | A_22_P00019065 | lnc-RP11-1105G2.3 | lnc-RP11-1105G2.3 |
| 58 | A_21_P0005747  | ENST00000523572   |                   |
| 59 | A_23_P217428   | NM_013427         | ARHGAP6           |
| 60 | A_33_P3364864  | NM_005746         | NAMPT             |



|    |                |                                |             |
|----|----------------|--------------------------------|-------------|
| 1  |                |                                |             |
| 2  | A_24_P179044   | NM_016224                      | SNX9        |
| 3  | A_32_P198731   | NM_001142651                   | NEURL1B     |
| 4  | A_23_P429977   | NM_000218                      | KCNQ1       |
| 5  | A_23_P212655   | NM_130446                      | KLHL6       |
| 6  | A_24_P12626    | NM_001753                      | CAV1        |
| 7  |                |                                |             |
| 8  | A_23_P204087   | NM_016817                      | OAS2        |
| 9  | A_33_P3225567  | NM_024917                      | TRMT2B      |
| 10 | A_24_P129341   | NM_020299                      | AKR1B10     |
| 11 | A_24_P212539   | NM_138801                      | GALM        |
| 12 |                |                                |             |
| 13 | A_22_P00015986 | ENST00000506148                |             |
| 14 | A_23_P150549   | NM_001079807                   | PGA3        |
| 15 | A_23_P100711   | NM_000304                      | PMP22       |
| 16 | A_33_P3413671  | NM_007314                      | ABL2        |
| 17 | A_23_P258493   | NM_005573                      | LMNB1       |
| 18 |                |                                |             |
| 19 | A_33_P3343175  | NM_001565                      | CXCL10      |
| 20 | A_23_P74609    | NM_015714                      | G0S2        |
| 21 | A_24_P58337    | NM_002032                      | FTH1        |
| 22 | A_33_P3250730  | NM_182847                      | ASIC4       |
| 23 | A_24_P235429   | NM_005502                      | ABCA1       |
| 24 |                |                                |             |
| 25 | A_23_P350001   | NM_000855                      | GUCY1A2     |
| 26 | A_23_P401      | NM_016343                      | CENPF       |
| 27 | A_24_P82106    | NM_004995                      | MMP14       |
| 28 | A_33_P3395605  | NM_181724                      | TMEM119     |
| 29 | A_23_P70127    | NM_017510                      | TMED9       |
| 30 |                |                                |             |
| 31 | A_23_P37988    | NM_152727                      | CPNE2       |
| 32 | A_22_P00009778 | ENST00000584649                |             |
| 33 | A_23_P389897   | NM_002507                      | NGFR        |
| 34 | A_23_P119778   | NM_020342                      | SLC39A10    |
| 35 | A_23_P121064   | NM_002852                      | PTX3        |
| 36 |                |                                |             |
| 37 | A_22_P00004035 | ENST00000437569                |             |
| 38 | A_23_P169934   | NM_178314                      | RILPL1      |
| 39 | A_24_P751074   | NM_005238                      | ETS1        |
| 40 | A_33_P3249509  | NM_205843                      | NFIC        |
| 41 | A_33_P3224800  | ENST00000435988                | NCF1B       |
| 42 | A_23_P213959   | NM_133263                      | PPARGC1B    |
| 43 |                |                                |             |
| 44 | A_21_P0013032  | ENST00000368966                | CCDC162P    |
| 45 | A_21_P0010870  | NM_001169106                   | FAM21C      |
| 46 | A_32_P134290   | NM_017742                      | ZCCHC2      |
| 47 | A_23_P23074    | NM_006417                      | IFI44       |
| 48 |                |                                |             |
| 49 | A_23_P147918   | NM_080388                      | S100A16     |
| 50 | A_33_P3222367  | NR_002988                      | SNORA74B    |
| 51 | A_33_P3391290  | NM_001142483                   | NREP        |
| 52 | A_23_P253321   | NM_006228                      | PNOC        |
| 53 | A_33_P3352407  | ENST00000434913                |             |
| 54 |                |                                |             |
| 55 | A_21_P0003882  | Inc-CTBP1-1:1                  | Inc-CTBP1-1 |
| 56 | A_23_P132277   | NM_006739                      | MCM5        |
| 57 | A_23_P60146    | NM_006207                      | PDGFRL      |
| 58 | A_33_P3270636  | NM_001272068                   | SHISA5      |
| 59 | A_21_P0011522  | TCONS_I2_000106(XLOC_I2_005692 |             |
| 60 | A_23_P67971    | NM_138801                      | GALM        |



|    |                |                 |              |
|----|----------------|-----------------|--------------|
| 1  |                |                 |              |
| 2  | A_24_P161018   | NM_017554       | PARP14       |
| 3  | A_24_P323598   | NM_001017420    | ESCO2        |
| 4  | A_33_P3224803  | NM_000265       | NCF1         |
| 5  | A_23_P320897   | NM_001195215    | DENND1B      |
| 6  | A_23_P60591    | NM_003315       | DNAJC7       |
| 7  | A_24_P295245   | NM_032467       | ASPH         |
| 8  | A_22_P00012499 | NR_015377       | PAX8-AS1     |
| 9  | A_23_P97623    | NM_022157       | RRAGC        |
| 10 | A_23_P153562   | NM_001736       | C5AR1        |
| 11 | A_33_P3415808  | NR_120309       | LOC102724467 |
| 12 | A_33_P3336696  | ENST00000361335 | ND4L         |
| 13 | A_23_P69179    | NM_018192       | P3H2         |
| 14 | A_23_P50096    | NM_001071       | TYMS         |
| 15 | A_23_P360754   | NM_005099       | ADAMTS4      |
| 16 | A_33_P3408054  | ENST00000602906 |              |
| 17 | A_21_P0014273  | ENST00000532805 | CYP2R1       |
| 18 | A_32_P342064   | NM_002032       | FTH1         |
| 19 | A_23_P162874   | NM_005348       | HSP90AA1     |
| 20 | A_23_P215634   | NM_001013398    | IGFBP3       |
| 21 | A_33_P3258046  | NM_170685       | TAC4         |
| 22 | A_21_P0014771  |                 |              |
| 23 | A_23_P368886   | NM_175856       | CHSY3        |
| 24 | A_21_P0000108  | NM_001190702    | MTRNR2L8     |
| 25 | A_24_P362193   | NM_003874       | CD84         |
| 26 | A_33_P3347040  | NM_001242901    | DPP9-AS1     |
| 27 | A_33_P3849600  | M30627          | HSP90AA2P    |
| 28 |                |                 |              |
| 29 |                |                 |              |
| 30 |                |                 |              |
| 31 |                |                 |              |
| 32 |                |                 |              |
| 33 |                |                 |              |
| 34 |                |                 |              |
| 35 |                |                 |              |
| 36 |                |                 |              |
| 37 |                |                 |              |
| 38 |                |                 |              |
| 39 |                |                 |              |
| 40 |                |                 |              |
| 41 |                |                 |              |
| 42 |                |                 |              |
| 43 |                |                 |              |
| 44 |                |                 |              |
| 45 |                |                 |              |
| 46 |                |                 |              |
| 47 |                |                 |              |
| 48 |                |                 |              |
| 49 |                |                 |              |
| 50 |                |                 |              |
| 51 |                |                 |              |
| 52 |                |                 |              |
| 53 |                |                 |              |
| 54 |                |                 |              |
| 55 |                |                 |              |
| 56 |                |                 |              |
| 57 |                |                 |              |
| 58 |                |                 |              |
| 59 |                |                 |              |
| 60 |                |                 |              |

| description                                                  | adj. p value | log 2 FC |
|--------------------------------------------------------------|--------------|----------|
| limb bud and heart development                               | 0            | -2.18    |
| roundabout guidance receptor 4                               | 0            | -1.62    |
| lysyl oxidase-like 4                                         | 0            | -1.48    |
| HOP homeobox                                                 | 0            | -1.47    |
| Ras and Rab interactor 2                                     | 0            | -1.45    |
| Fc fragment of IgG binding protein                           | 0            | -1.42    |
| MIR503 host gene                                             | 0            | -1.39    |
| cholesterol 25-hydroxylase                                   | 0            | -1.38    |
| matrix metalloproteinase 12                                  | 0            | -1.35    |
| coiled-coil domain containing 170                            | 0            | -1.35    |
| killer cell lectin-like receptor subfamily C, member 1       | 0            | -1.33    |
| arachidonate 5-lipoxygenase-activating protein               | 0            | -1.22    |
| CXADR-like membrane protein                                  | 0            | -1.18    |
| heparanase                                                   | 0            | -1.17    |
| selenoprotein P, plasma, 1                                   | 0            | -1.16    |
| high mobility group AT-hook 2                                | 0            | -1.16    |
| collagen, type IV, alpha 4                                   | 0            | -1.16    |
| G protein-coupled receptor 68                                | 0            | -1.13    |
| bone morphogenetic protein 4                                 | 0            | -1.1     |
| cholinergic receptor, muscarinic 2                           | 0            | -1.09    |
| selenoprotein W, 1                                           | 0            | -1.08    |
| neurotensin receptor 1 (high affinity)                       | 0            | -1.06    |
| cathepsin C                                                  | 0            | -1.06    |
| neurogranin (protein kinase C substrate, RC3)                | 0            | -1.05    |
| protein tyrosine phosphatase type IVA, member 3              | 0            | -1.05    |
| chemokine (C-X3-C motif) receptor 1                          | 0            | -1.03    |
| sialic acid binding Ig-like lectin 11                        | 0            | -1.02    |
| protein kinase domain containing, cytoplasmic                | 0            | -1.01    |
| sortilin-related receptor, L(DLR class) A repeats containing | 0            | -1       |
| integral membrane protein 2C                                 | 0            | -1       |
| multimerin 2                                                 | 0            | -0.99    |
| 5-nucleotidase, ecto (CD73)                                  | 0            | -0.99    |
| enabled homolog (Drosophila)                                 | 0            | -0.98    |
| protein kinase domain containing, cytoplasmic                | 0            | -0.98    |
| NA                                                           | 0            | -0.97    |
| transmembrane protein 184C                                   | 0            | -0.97    |
| cholinergic receptor, muscarinic 3                           | 0            | -0.96    |
| CD93 molecule                                                | 0            | -0.96    |
| cathepsin C                                                  | 0            | -0.96    |
| transforming growth factor, beta receptor II (70/80kDa)      | 0            | -0.95    |
| limb bud and heart development                               | 0            | -0.93    |
| ST8 alpha-N-acetyl-neuraminide alpha-2,8-sialyltransferase 5 | 0            | -0.92    |
| family with sequence similarity 101, member B                | 0            | -0.92    |
| family with sequence similarity 135, member B                | 0            | -0.92    |
| wntless Wnt ligand secretion mediator                        | 0            | -0.88    |
| TOX high mobility group box family member 2                  | 0            | -0.85    |
| selenoprotein W, 1                                           | 0            | -0.84    |

|    |                                                                 |   |       |
|----|-----------------------------------------------------------------|---|-------|
| 1  |                                                                 |   |       |
| 2  | spermine oxidase                                                | 0 | -0.82 |
| 3  | out at first homolog                                            | 0 | -0.82 |
| 4  | transforming growth factor, beta-induced, 68kDa                 | 0 | -0.8  |
| 5  | adenosine deaminase, RNA-specific, B1                           | 0 | -0.8  |
| 6  | sortilin 1                                                      | 0 | -0.8  |
| 7  |                                                                 |   |       |
| 8  | pyridine nucleotide-disulphide oxidoreductase domain 2          | 0 | -0.79 |
| 9  | matrix metalloproteinase 7                                      | 0 | -0.79 |
| 10 | cyclin-dependent kinase inhibitor 2D (p19, inhibits CDK4)       | 0 | -0.78 |
| 11 | sprouty-related, EVH1 domain containing 1                       | 0 | -0.78 |
| 12 | glutathione peroxidase 1                                        | 0 | -0.78 |
| 13 |                                                                 |   |       |
| 14 | carcinoembryonic antigen-related cell adhesion molecule 6 (non  | 0 | -0.77 |
| 15 | NA                                                              | 0 | -0.77 |
| 16 | ATPase, aminophospholipid transporter, class I, type 8B, membe  | 0 | -0.76 |
| 17 | NA                                                              | 0 | -0.75 |
| 18 |                                                                 |   |       |
| 19 | sema domain, immunoglobulin domain (Ig), transmembrane don      | 0 | -0.75 |
| 20 | long intergenic non-protein coding RNA 341                      | 0 | -0.75 |
| 21 | pleckstrin 2                                                    | 0 | -0.75 |
| 22 | NA                                                              | 0 | -0.74 |
| 23 | limb bud and heart development                                  | 0 | -0.74 |
| 24 |                                                                 |   |       |
| 25 | adrenoceptor beta 2, surface                                    | 0 | -0.73 |
| 26 | mast cell-expressed membrane protein 1                          | 0 | -0.73 |
| 27 | PHD finger protein 19                                           | 0 | -0.73 |
| 28 | NA                                                              | 0 | -0.72 |
| 29 | tubulin, alpha 4a                                               | 0 | -0.72 |
| 30 |                                                                 |   |       |
| 31 | polymeric immunoglobulin receptor                               | 0 | -0.72 |
| 32 | S100 calcium binding protein A4                                 | 0 | -0.71 |
| 33 | protoporphyrinogen oxidase                                      | 0 | -0.69 |
| 34 | integrin, beta 7                                                | 0 | -0.69 |
| 35 | Tctex1 domain containing 1                                      | 0 | -0.68 |
| 36 | sialic acid binding Ig-like lectin 16 (gene/pseudogene)         | 0 | -0.68 |
| 37 |                                                                 |   |       |
| 38 | sterile alpha motif and leucine zipper containing kinase AZK    | 0 | -0.67 |
| 39 | leukocyte immunoglobulin-like receptor, subfamily B (with TM al | 0 | -0.67 |
| 40 | NA                                                              | 0 | -0.66 |
| 41 | cysteinyl leukotriene receptor 1                                | 0 | -0.66 |
| 42 | G protein-coupled receptor 84                                   | 0 | -0.65 |
| 43 |                                                                 |   |       |
| 44 | RecQ mediated genome instability 2                              | 0 | -0.65 |
| 45 | small cell adhesion glycoprotein                                | 0 | -0.65 |
| 46 | RAS protein activator like 3                                    | 0 | -0.64 |
| 47 | chromosome 2 open reading frame 91                              | 0 | -0.6  |
| 48 | pecanex-like 2 (Drosophila)                                     | 0 | -0.58 |
| 49 |                                                                 |   |       |
| 50 | ankyrin repeat domain 1 (cardiac muscle)                        | 0 | 0.58  |
| 51 | vesicle amine transport 1                                       | 0 | 0.58  |
| 52 | family with sequence similarity 21, member C                    | 0 | 0.58  |
| 53 | CDK5 regulatory subunit associated protein 2                    | 0 | 0.58  |
| 54 | cathepsin Z                                                     | 0 | 0.58  |
| 55 |                                                                 |   |       |
| 56 | von Willebrand factor A domain containing 5A                    | 0 | 0.58  |
| 57 | claudin 23                                                      | 0 | 0.59  |
| 58 | PR domain containing 13                                         | 0 | 0.59  |
| 59 | NCK-associated protein 1                                        | 0 | 0.59  |
| 60 | sialidase 1 (lysosomal sialidase)                               | 0 | 0.59  |

|    |                                                                    |   |      |
|----|--------------------------------------------------------------------|---|------|
| 1  |                                                                    |   |      |
| 2  | NA                                                                 | 0 | 0.6  |
| 3  | NA                                                                 | 0 | 0.6  |
| 4  | NA                                                                 | 0 | 0.6  |
| 5  | NA                                                                 | 0 | 0.61 |
| 6  | mitogen-activated protein kinase kinase 3                          | 0 | 0.62 |
| 7  | ubiquilin 1                                                        | 0 | 0.63 |
| 8  | NA                                                                 | 0 | 0.64 |
| 9  | NA                                                                 | 0 | 0.64 |
| 10 | NA                                                                 | 0 | 0.64 |
| 11 | Niemann-Pick disease, type C1                                      | 0 | 0.64 |
| 12 | neuropeptide FF receptor 2                                         | 0 | 0.64 |
| 13 | phosphodiesterase 4D interacting protein                           | 0 | 0.64 |
| 14 | apolipoprotein C-I                                                 | 0 | 0.64 |
| 15 | zinc finger, AN1-type domain 5                                     | 0 | 0.64 |
| 16 | transmembrane protein 167B                                         | 0 | 0.64 |
| 17 | N-myristoyltransferase 2                                           | 0 | 0.65 |
| 18 | claudin 14                                                         | 0 | 0.65 |
| 19 | ATPase, H <sup>+</sup> transporting, lysosomal 14kDa, V1 subunit F | 0 | 0.65 |
| 20 | coiled-coil domain containing 77                                   | 0 | 0.65 |
| 21 | pleckstrin homology domain containing, family B (evectins) mem     | 0 | 0.65 |
| 22 | zinc finger protein 746                                            | 0 | 0.65 |
| 23 | chromosome 8 open reading frame 22                                 | 0 | 0.65 |
| 24 | ZMIZ1 antisense RNA 1                                              | 0 | 0.66 |
| 25 | glucan (1,4-alpha-), branching enzyme 1                            | 0 | 0.66 |
| 26 | abhydrolase domain containing 6                                    | 0 | 0.66 |
| 27 | Cbl proto-oncogene B, E3 ubiquitin protein ligase                  | 0 | 0.66 |
| 28 | interferon-induced protein with tetratricopeptide repeats 2        | 0 | 0.66 |
| 29 | D-aspartate oxidase                                                | 0 | 0.66 |
| 30 | chromosome 1 open reading frame 198                                | 0 | 0.66 |
| 31 | uncharacterized LOC153811                                          | 0 | 0.66 |
| 32 | lactate dehydrogenase A-like 6B                                    | 0 | 0.67 |
| 33 | Pim-3 proto-oncogene, serine/threonine kinase                      | 0 | 0.67 |
| 34 | ras homolog family member Q                                        | 0 | 0.67 |
| 35 | acyl-CoA synthetase long-chain family member 1                     | 0 | 0.68 |
| 36 | solute carrier family 11 (proton-coupled divalent metal ion trans  | 0 | 0.68 |
| 37 | cathepsin V                                                        | 0 | 0.68 |
| 38 | thyroid hormone receptor, alpha                                    | 0 | 0.68 |
| 39 | human immunodeficiency virus type I enhancer binding protein       | 0 | 0.68 |
| 40 | ras homolog family member Q                                        | 0 | 0.68 |
| 41 | DEAD (Asp-Glu-Ala-Asp) box polypeptide 58                          | 0 | 0.68 |
| 42 | oncostatin M                                                       | 0 | 0.69 |
| 43 | AXL receptor tyrosine kinase                                       | 0 | 0.69 |
| 44 | long intergenic non-protein coding RNA 942                         | 0 | 0.69 |
| 45 | long intergenic non-protein coding RNA, p53 induced transcript     | 0 | 0.7  |
| 46 | complement factor H                                                | 0 | 0.7  |
| 47 | transmembrane protein 251                                          | 0 | 0.7  |
| 48 | phosphatidic acid phosphatase type 2A                              | 0 | 0.7  |
| 49 | transmembrane protein 144                                          | 0 | 0.7  |
| 50 | NA                                                                 | 0 | 0.71 |
| 51 | WW domain binding protein 5                                        | 0 | 0.71 |
| 52 | cathepsin K                                                        | 0 | 0.71 |

|    |                                                                      |   |      |
|----|----------------------------------------------------------------------|---|------|
| 1  |                                                                      |   |      |
| 2  | solute carrier family 1 (glial high affinity glutamate transporter), | 0 | 0.71 |
| 3  | solute carrier family 36 (proton/amino acid symporter), member       | 0 | 0.71 |
| 4  | NA                                                                   | 0 | 0.72 |
| 5  | CCAAT/enhancer binding protein (C/EBP), beta                         | 0 | 0.72 |
| 6  | atlastin GTPase 1                                                    | 0 | 0.72 |
| 7  | chromosome 1 open reading frame 21                                   | 0 | 0.72 |
| 8  | synaptophysin-like 2                                                 | 0 | 0.72 |
| 9  | receptor-interacting serine-threonine kinase 2                       | 0 | 0.73 |
| 10 | oxidation resistance 1                                               | 0 | 0.73 |
| 11 | NA                                                                   | 0 | 0.73 |
| 12 | ATPase, H <sup>+</sup> transporting, lysosomal 42kDa, V1 subunit C1  | 0 | 0.73 |
| 13 | solute carrier family 38, member 6                                   | 0 | 0.73 |
| 14 | NA                                                                   | 0 | 0.74 |
| 15 | NA                                                                   | 0 | 0.74 |
| 16 | NA                                                                   | 0 | 0.74 |
| 17 | NA                                                                   | 0 | 0.74 |
| 18 | transmembrane protein 255A                                           | 0 | 0.74 |
| 19 | regulator of G-protein signaling 4                                   | 0 | 0.74 |
| 20 | coiled-coil domain containing 88A                                    | 0 | 0.74 |
| 21 | solute carrier family 11 (proton-coupled divalent metal ion trans    | 0 | 0.74 |
| 22 | fatty acid binding protein 3, muscle and heart                       | 0 | 0.74 |
| 23 | NA                                                                   | 0 | 0.74 |
| 24 | glucagon                                                             | 0 | 0.74 |
| 25 | interleukin 15                                                       | 0 | 0.75 |
| 26 | lactamase, beta                                                      | 0 | 0.75 |
| 27 | apoptosis-inducing factor, mitochondrion-associated, 2               | 0 | 0.75 |
| 28 | nuclear receptor subfamily 1, group H, member 3                      | 0 | 0.75 |
| 29 | NAD(P)H dehydrogenase, quinone 1                                     | 0 | 0.76 |
| 30 | phospholipase D family, member 6                                     | 0 | 0.76 |
| 31 | mitogen-activated protein kinase kinase 3                            | 0 | 0.76 |
| 32 | GM2 ganglioside activator                                            | 0 | 0.76 |
| 33 | sterile alpha motif domain containing 9-like                         | 0 | 0.77 |
| 34 | cystatin B (stefin B)                                                | 0 | 0.77 |
| 35 | methyltransferase like 1                                             | 0 | 0.77 |
| 36 | 5-aminolevulinate synthase 1                                         | 0 | 0.77 |
| 37 | Myb/SANT-like DNA-binding domain containing 3                        | 0 | 0.77 |
| 38 | NA                                                                   | 0 | 0.77 |
| 39 | NA                                                                   | 0 | 0.78 |
| 40 | Pim-1 proto-oncogene, serine/threonine kinase                        | 0 | 0.78 |
| 41 | NA                                                                   | 0 | 0.78 |
| 42 | zinc finger protein 365                                              | 0 | 0.78 |
| 43 | serum/glucocorticoid regulated kinase 1                              | 0 | 0.79 |
| 44 | chemokine (C-C motif) receptor-like 2                                | 0 | 0.79 |
| 45 | myosin X                                                             | 0 | 0.79 |
| 46 | NA                                                                   | 0 | 0.8  |
| 47 | NA                                                                   | 0 | 0.8  |
| 48 | NA                                                                   | 0 | 0.8  |
| 49 | glutaredoxin (thioltransferase)                                      | 0 | 0.8  |
| 50 | kinesin family member 1B                                             | 0 | 0.8  |
| 51 | sterile alpha motif domain containing 9-like                         | 0 | 0.8  |

|    |                                                                       |   |      |
|----|-----------------------------------------------------------------------|---|------|
| 1  |                                                                       |   |      |
| 2  | NA                                                                    | 0 | 0.81 |
| 3  | tumor protein D52-like 1                                              | 0 | 0.81 |
| 4  | activating transcription factor 3                                     | 0 | 0.81 |
| 5  | galactosidase, alpha                                                  | 0 | 0.81 |
| 6  | deafness, autosomal dominant 5                                        | 0 | 0.81 |
| 7  | family with sequence similarity 21, member C                          | 0 | 0.81 |
| 8  | NA                                                                    | 0 | 0.82 |
| 9  | troponin I type 2 (skeletal, fast)                                    | 0 | 0.82 |
| 10 | heat shock 105kDa/110kDa protein 1                                    | 0 | 0.82 |
| 11 | perilipin 4                                                           | 0 | 0.82 |
| 12 | NA                                                                    | 0 | 0.83 |
| 13 | protein C (inactivator of coagulation factors Va and VIIIa)           | 0 | 0.83 |
| 14 | ATPase, H <sup>+</sup> transporting, lysosomal 50/57kDa, V1 subunit H | 0 | 0.83 |
| 15 | ATPase, H <sup>+</sup> transporting, lysosomal 70kDa, V1 subunit A    | 0 | 0.83 |
| 16 | pleckstrin homology domain containing, family M, member 3             | 0 | 0.83 |
| 17 | jun proto-oncogene                                                    | 0 | 0.84 |
| 18 | ghrelin/obestatin prepropeptide                                       | 0 | 0.85 |
| 19 | lectin, galactoside-binding, soluble, 8                               | 0 | 0.85 |
| 20 | NA                                                                    | 0 | 0.86 |
| 21 | NA                                                                    | 0 | 0.86 |
| 22 | glutathione S-transferase mu 3 (brain)                                | 0 | 0.86 |
| 23 | microsomal glutathione S-transferase 1                                | 0 | 0.86 |
| 24 | interferon induced with helicase C domain 1                           | 0 | 0.86 |
| 25 | N(alpha)-acetyltransferase 50, NatE catalytic subunit                 | 0 | 0.86 |
| 26 | myeloid/lymphoid or mixed-lineage leukemia; translocated to, 1        | 0 | 0.87 |
| 27 | nuclear factor, erythroid 2-like 3                                    | 0 | 0.87 |
| 28 | dendritic cell-associated nuclear protein                             | 0 | 0.87 |
| 29 | growth arrest and DNA-damage-inducible, gamma                         | 0 | 0.87 |
| 30 | urocortin 2                                                           | 0 | 0.87 |
| 31 | neurolysin (metallopeptidase M3 family)                               | 0 | 0.87 |
| 32 | ubiquitin protein ligase E3 component n-recogin 4                     | 0 | 0.87 |
| 33 | NA                                                                    | 0 | 0.88 |
| 34 | ATPase, H <sup>+</sup> transporting, lysosomal 42kDa, V1 subunit C1   | 0 | 0.88 |
| 35 | SH3-domain binding protein 5 (BTK-associated)                         | 0 | 0.88 |
| 36 | prokineticin 2                                                        | 0 | 0.88 |
| 37 | ribosomal protein S6 kinase, 90kDa, polypeptide 2                     | 0 | 0.88 |
| 38 | NA                                                                    | 0 | 0.89 |
| 39 | NA                                                                    | 0 | 0.9  |
| 40 | NA                                                                    | 0 | 0.9  |
| 41 | tripartite motif family-like 2                                        | 0 | 0.9  |
| 42 | sarcoglycan, gamma (35kDa dystrophin-associated glycoprotein)         | 0 | 0.9  |
| 43 | NA                                                                    | 0 | 0.91 |
| 44 | NA                                                                    | 0 | 0.91 |
| 45 | NA                                                                    | 0 | 0.91 |
| 46 | v-maf avian musculoaponeurotic fibrosarcoma oncogene homolog          | 0 | 0.91 |
| 47 | leupaxin                                                              | 0 | 0.91 |
| 48 | cytoplasmic polyadenylation element binding protein 1                 | 0 | 0.91 |
| 49 | NA                                                                    | 0 | 0.92 |
| 50 | NA                                                                    | 0 | 0.92 |
| 51 | melanoregulin                                                         | 0 | 0.92 |

|    |                                                                       |   |      |
|----|-----------------------------------------------------------------------|---|------|
| 1  |                                                                       |   |      |
| 2  | tubulin, beta 2A class IIa                                            | 0 | 0.92 |
| 3  | low density lipoprotein receptor                                      | 0 | 0.92 |
| 4  | hexokinase 2                                                          | 0 | 0.92 |
| 5  | sphingosine kinase 1                                                  | 0 | 0.92 |
| 6  | transcription factor EC                                               | 0 | 0.92 |
| 7  | nuclear receptor interacting protein 3                                | 0 | 0.92 |
| 8  | tubulin tyrosine ligase-like family member 4                          | 0 | 0.92 |
| 9  | mannose-P-dolichol utilization defect 1                               | 0 | 0.92 |
| 10 | glutathione reductase                                                 | 0 | 0.93 |
| 11 | adaptor-related protein complex 3, beta 2 subunit                     | 0 | 0.93 |
| 12 | NA                                                                    | 0 | 0.94 |
| 13 | NA                                                                    | 0 | 0.94 |
| 14 | glycerol-3-phosphate acyltransferase 3                                | 0 | 0.94 |
| 15 | heat shock 27kDa protein 3                                            | 0 | 0.94 |
| 16 | NA                                                                    | 0 | 0.95 |
| 17 | endothelial PAS domain protein 1                                      | 0 | 0.95 |
| 18 | aldo-keto reductase family 1, member B10 (aldose reductase)           | 0 | 0.95 |
| 19 | serine dehydratase-like                                               | 0 | 0.95 |
| 20 | spire-type actin nucleation factor 1                                  | 0 | 0.95 |
| 21 | amidohydrolase domain containing 2                                    | 0 | 0.95 |
| 22 | NA                                                                    | 0 | 0.96 |
| 23 | chromosome 1 open reading frame 226                                   | 0 | 0.96 |
| 24 | epithelial stromal interaction 1 (breast)                             | 0 | 0.96 |
| 25 | mitogen-activated protein kinase 10                                   | 0 | 0.96 |
| 26 | CD83 molecule                                                         | 0 | 0.96 |
| 27 | vestigial-like family member 2                                        | 0 | 0.96 |
| 28 | monoglyceride lipase                                                  | 0 | 0.96 |
| 29 | phosphodiesterase 4D interacting protein                              | 0 | 0.96 |
| 30 | MIR146A host gene                                                     | 0 | 0.96 |
| 31 | F-box protein 30                                                      | 0 | 0.97 |
| 32 | protein C (inactivator of coagulation factors Va and VIIIa)           | 0 | 0.97 |
| 33 | ATPase, Ca <sup>++</sup> transporting, type 2C, member 1              | 0 | 0.98 |
| 34 | intercellular adhesion molecule 1                                     | 0 | 0.98 |
| 35 | melanoma antigen family B2                                            | 0 | 0.98 |
| 36 | protein phosphatase 1, regulatory subunit 15A                         | 0 | 0.98 |
| 37 | phosphodiesterase 4D interacting protein                              | 0 | 0.98 |
| 38 | solute carrier family 48 (heme transporter), member 1                 | 0 | 0.98 |
| 39 | tRNA methyltransferase 5                                              | 0 | 0.98 |
| 40 | NA                                                                    | 0 | 0.99 |
| 41 | NA                                                                    | 0 | 0.99 |
| 42 | methylenetetrahydrofolate dehydrogenase (NADP <sup>+</sup> dependent) | 0 | 0.99 |
| 43 | nuclear receptor interacting protein 3                                | 0 | 0.99 |
| 44 | interleukin 13 receptor, alpha 2                                      | 0 | 0.99 |
| 45 | basic helix-loop-helix family, member e40                             | 0 | 0.99 |
| 46 | transaldolase 1                                                       | 0 | 0.99 |
| 47 | pannexin 2                                                            | 0 | 0.99 |
| 48 | NA                                                                    | 0 | 1    |
| 49 | metallothionein 1E                                                    | 0 | 1.01 |
| 50 | v-rel avian reticuloendotheliosis viral oncogene homolog B            | 0 | 1.01 |
| 51 | tumor necrosis factor, alpha-induced protein 3                        | 0 | 1.01 |
| 52 |                                                                       |   |      |
| 53 |                                                                       |   |      |
| 54 |                                                                       |   |      |
| 55 |                                                                       |   |      |
| 56 |                                                                       |   |      |
| 57 |                                                                       |   |      |
| 58 |                                                                       |   |      |
| 59 |                                                                       |   |      |
| 60 |                                                                       |   |      |



|    |                                                                    |   |      |
|----|--------------------------------------------------------------------|---|------|
| 1  |                                                                    |   |      |
| 2  | NA                                                                 | 0 | 1.02 |
| 3  | glucosidase, beta, acid 3 (gene/pseudogene)                        | 0 | 1.02 |
| 4  | N-acetylneuraminate pyruvate lyase (dihydrodipicolinate synthase)  | 0 | 1.02 |
| 5  | NA                                                                 | 0 | 1.03 |
| 6  | KIAA0408                                                           | 0 | 1.03 |
| 7  | arrestin domain containing 4                                       | 0 | 1.03 |
| 8  | phospholipase A2, group IVC (cytosolic, calcium-independent)       | 0 | 1.03 |
| 9  | Rho-related BTB domain containing 3                                | 0 | 1.03 |
| 10 | NA                                                                 | 0 | 1.04 |
| 11 | V-set and immunoglobulin domain containing 10 like                 | 0 | 1.04 |
| 12 | tumor necrosis factor, alpha-induced protein 2                     | 0 | 1.04 |
| 13 | BCL2-associated athanogene 3                                       | 0 | 1.04 |
| 14 | TRAF-interacting protein with forkhead-associated domain, family 1 | 0 | 1.04 |
| 15 | ATP-binding cassette, sub-family C (CFTR/MRP), member 3            | 0 | 1.05 |
| 16 | tubulin, beta 3 class III                                          | 0 | 1.05 |
| 17 | SLAM family member 7                                               | 0 | 1.05 |
| 18 | NA                                                                 | 0 | 1.06 |
| 19 | NA                                                                 | 0 | 1.06 |
| 20 | somatostatin receptor 2                                            | 0 | 1.06 |
| 21 | outer dense fiber of sperm tails 3B                                | 0 | 1.06 |
| 22 | NA                                                                 | 0 | 1.07 |
| 23 | kelch-like family member 21                                        | 0 | 1.07 |
| 24 | transmembrane 4 L six family member 19                             | 0 | 1.07 |
| 25 | phosphodiesterase 4D interacting protein                           | 0 | 1.07 |
| 26 | interleukin-1 receptor-associated kinase 2                         | 0 | 1.07 |
| 27 | interferon induced transmembrane protein 10                        | 0 | 1.07 |
| 28 | family with sequence similarity 189, member A2                     | 0 | 1.08 |
| 29 | RAB20, member RAS oncogene family                                  | 0 | 1.08 |
| 30 | monoglyceride lipase                                               | 0 | 1.08 |
| 31 | NA                                                                 | 0 | 1.08 |
| 32 | N-acetylneuraminate pyruvate lyase (dihydrodipicolinate synthase)  | 0 | 1.08 |
| 33 | folliculin interacting protein 2                                   | 0 | 1.08 |
| 34 | NA                                                                 | 0 | 1.09 |
| 35 | dual specificity phosphatase 13                                    | 0 | 1.09 |
| 36 | leucine rich repeat containing 3B                                  | 0 | 1.09 |
| 37 | hydroxycarboxylic acid receptor 3                                  | 0 | 1.09 |
| 38 | phosphodiesterase 4D interacting protein                           | 0 | 1.09 |
| 39 | ribosomal protein S6 kinase, 90kDa, polypeptide 2                  | 0 | 1.09 |
| 40 | 2-5-oligoadenylate synthetase-like                                 | 0 | 1.1  |
| 41 | tumor necrosis factor, alpha-induced protein 6                     | 0 | 1.1  |
| 42 | DnaJ (Hsp40) homolog, subfamily A, member 4                        | 0 | 1.1  |
| 43 | interleukin 36, beta                                               | 0 | 1.1  |
| 44 | NA                                                                 | 0 | 1.11 |
| 45 | cytotoxic and regulatory T cell molecule                           | 0 | 1.11 |
| 46 | tissue factor pathway inhibitor 2                                  | 0 | 1.11 |
| 47 | BMP and activin membrane-bound inhibitor                           | 0 | 1.11 |
| 48 | C-type lectin domain family 19, member A                           | 0 | 1.11 |
| 49 | matrix metalloproteinase 19                                        | 0 | 1.12 |
| 50 | microtubule-associated protein 1B                                  | 0 | 1.12 |
| 51 | immediate early response 5                                         | 0 | 1.13 |



|    |                                                                   |   |      |
|----|-------------------------------------------------------------------|---|------|
| 1  |                                                                   |   |      |
| 2  | growth arrest and DNA-damage-inducible, beta                      | 0 | 1.13 |
| 3  | dual specificity phosphatase 1                                    | 0 | 1.14 |
| 4  | peroxiredoxin 1                                                   | 0 | 1.14 |
| 5  | aquaporin 1 (Colton blood group)                                  | 0 | 1.14 |
| 6  | NA                                                                | 0 | 1.15 |
| 7  | dihydropyrimidinase-like 3                                        | 0 | 1.15 |
| 8  | interferon-induced protein 44-like                                | 0 | 1.16 |
| 9  | nuclear protein, transcriptional regulator, 1                     | 0 | 1.16 |
| 10 | coiled-coil domain containing 85A                                 | 0 | 1.16 |
| 11 | NA                                                                | 0 | 1.17 |
| 12 | NA                                                                | 0 | 1.17 |
| 13 | NA                                                                | 0 | 1.17 |
| 14 | homogentisate 1,2-dioxygenase                                     | 0 | 1.18 |
| 15 | kelch-like family member 6                                        | 0 | 1.18 |
| 16 | peroxiredoxin 1                                                   | 0 | 1.18 |
| 17 | NA                                                                | 0 | 1.2  |
| 18 | chromosome 11 open reading frame 96                               | 0 | 1.2  |
| 19 | NA                                                                | 0 | 1.21 |
| 20 | regulating synaptic membrane exocytosis 3                         | 0 | 1.22 |
| 21 | basic helix-loop-helix family, member e41                         | 0 | 1.23 |
| 22 | Rho family GTPase 3                                               | 0 | 1.24 |
| 23 | corepressor interacting with RBPJ, 1                              | 0 | 1.24 |
| 24 | NA                                                                | 0 | 1.25 |
| 25 | MX dynamin-like GTPase 1                                          | 0 | 1.25 |
| 26 | Ras-related associated with diabetes                              | 0 | 1.25 |
| 27 | nuclear factor of kappa light polypeptide gene enhancer in B-cell | 0 | 1.26 |
| 28 | malic enzyme 1, NADP(+)-dependent, cytosolic                      | 0 | 1.26 |
| 29 | PAX8 antisense RNA 1                                              | 0 | 1.27 |
| 30 | muscle RAS oncogene homolog                                       | 0 | 1.27 |
| 31 | low density lipoprotein receptor-related protein 12               | 0 | 1.28 |
| 32 | growth arrest and DNA-damage-inducible, gamma                     | 0 | 1.29 |
| 33 | NA                                                                | 0 | 1.31 |
| 34 | chemokine (C-C motif) ligand 15                                   | 0 | 1.31 |
| 35 | NA                                                                | 0 | 1.32 |
| 36 | long intergenic non-protein coding RNA 942                        | 0 | 1.33 |
| 37 | DnaJ (Hsp40) homolog, subfamily C, member 6                       | 0 | 1.33 |
| 38 | sialic acid binding Ig-like lectin 15                             | 0 | 1.34 |
| 39 | synaptophysin-like 2                                              | 0 | 1.34 |
| 40 | sequestosome 1                                                    | 0 | 1.35 |
| 41 | tripartite motif containing 47                                    | 0 | 1.35 |
| 42 | MET proto-oncogene, receptor tyrosine kinase                      | 0 | 1.37 |
| 43 | NA                                                                | 0 | 1.38 |
| 44 | NA                                                                | 0 | 1.38 |
| 45 | purinergic receptor P2X, ligand gated ion channel, 7              | 0 | 1.38 |
| 46 | neuronal cell adhesion molecule                                   | 0 | 1.39 |
| 47 | NA                                                                | 0 | 1.4  |
| 48 | calcium channel, voltage-dependent, T type, alpha 1G subunit      | 0 | 1.4  |
| 49 | hemicentin 1                                                      | 0 | 1.4  |
| 50 | solute carrier family 30 (zinc transporter), member 2             | 0 | 1.4  |
| 51 | NA                                                                | 0 | 1.41 |

|    |                                                                   |   |      |
|----|-------------------------------------------------------------------|---|------|
| 1  |                                                                   |   |      |
| 2  | interleukin 4 induced 1                                           | 0 | 1.41 |
| 3  | NA                                                                | 0 | 1.44 |
| 4  | small glutamine-rich tetratricopeptide repeat (TPR)-containing, t | 0 | 1.45 |
| 5  | radical S-adenosyl methionine domain containing 2                 | 0 | 1.46 |
| 6  | nuclear receptor subfamily 4, group A, member 3                   | 0 | 1.48 |
| 7  | glutamate-cysteine ligase, catalytic subunit                      | 0 | 1.49 |
| 9  | chromogranin A                                                    | 0 | 1.49 |
| 10 | NA                                                                | 0 | 1.5  |
| 11 | NA                                                                | 0 | 1.5  |
| 12 | tripartite motif containing 16-like                               | 0 | 1.5  |
| 14 | storkhead box 2                                                   | 0 | 1.5  |
| 15 | NA                                                                | 0 | 1.52 |
| 16 | NA                                                                | 0 | 1.53 |
| 17 | interferon-induced protein with tetratricopeptide repeats 1       | 0 | 1.54 |
| 18 | Epstein-Barr virus induced 3                                      | 0 | 1.55 |
| 19 | zinc finger protein 365                                           | 0 | 1.55 |
| 20 | NA                                                                | 0 | 1.55 |
| 21 | NA                                                                | 0 | 1.55 |
| 22 | NA                                                                | 0 | 1.57 |
| 23 | DnaJ (Hsp40) homolog, subfamily B, member 1                       | 0 | 1.57 |
| 24 | NA                                                                | 0 | 1.59 |
| 25 | spermidine/spermine N1-acetyltransferase 1                        | 0 | 1.59 |
| 26 | testis expressed 19                                               | 0 | 1.59 |
| 27 | hepcidin antimicrobial peptide                                    | 0 | 1.6  |
| 28 | spermidine/spermine N1-acetyltransferase 1                        | 0 | 1.6  |
| 29 | solute carrier family 30 (zinc transporter), member 1             | 0 | 1.61 |
| 30 | ubiquitin carboxyl-terminal esterase L1 (ubiquitin thiolesterase) | 0 | 1.62 |
| 31 | KIT ligand                                                        | 0 | 1.63 |
| 32 | chromosome 22 open reading frame 42                               | 0 | 1.65 |
| 33 | TBC1 domain family, member 2                                      | 0 | 1.65 |
| 34 | solute carrier family 26 (anion exchanger), member 11             | 0 | 1.66 |
| 35 | uncharacterized LOC283485                                         | 0 | 1.66 |
| 36 | pirin (iron-binding nuclear protein)                              | 0 | 1.67 |
| 37 | thioredoxin reductase 1                                           | 0 | 1.67 |
| 38 | CD86 molecule                                                     | 0 | 1.68 |
| 39 | NA                                                                | 0 | 1.69 |
| 40 | NA                                                                | 0 | 1.69 |
| 41 | musculin                                                          | 0 | 1.69 |
| 42 | coiled-coil domain containing 85A                                 | 0 | 1.7  |
| 43 | cytochrome P450, family 27, subfamily A, polypeptide 1            | 0 | 1.7  |
| 44 | uncharacterized LOC400958                                         | 0 | 1.71 |
| 45 | chemokine (C-C motif) ligand 20                                   | 0 | 1.71 |
| 46 | chromosome 12 open reading frame 50                               | 0 | 1.71 |
| 47 | NA                                                                | 0 | 1.73 |
| 48 | NA                                                                | 0 | 1.74 |
| 49 | adenylate kinase 8                                                | 0 | 1.75 |
| 50 | zinc finger, AN1-type domain 2A                                   | 0 | 1.77 |
| 51 | NA                                                                | 0 | 1.78 |
| 52 | clusterin                                                         | 0 | 1.78 |
| 53 | crystallin, alpha B                                               | 0 | 1.78 |
| 54 | adrenomedullin                                                    | 0 | 1.79 |
| 55 |                                                                   |   |      |
| 56 |                                                                   |   |      |
| 57 |                                                                   |   |      |
| 58 |                                                                   |   |      |
| 59 |                                                                   |   |      |
| 60 |                                                                   |   |      |

|    |                                                                     |   |      |
|----|---------------------------------------------------------------------|---|------|
| 1  |                                                                     |   |      |
| 2  | tetraspanin 10                                                      | 0 | 1.8  |
| 3  | chemokine (C-C motif) ligand 4                                      | 0 | 1.81 |
| 4  | cancer susceptibility candidate 15 (non-protein coding)             | 0 | 1.82 |
| 5  | peptidase inhibitor 3, skin-derived                                 | 0 | 1.82 |
| 6  | NA                                                                  | 0 | 1.84 |
| 7  | beta-1,4-N-acetyl-galactosaminyl transferase 1                      | 0 | 1.84 |
| 8  | chemokine (C-X-C motif) receptor 4                                  | 0 | 1.85 |
| 9  | serine dehydratase                                                  | 0 | 1.85 |
| 10 | chemokine (C-C motif) ligand 4                                      | 0 | 1.98 |
| 11 | NmrA-like family domain containing 1 pseudogene                     | 0 | 1.98 |
| 12 | NA                                                                  | 0 | 1.99 |
| 13 | chemokine (C-C motif) receptor 7                                    | 0 | 1.99 |
| 14 | neuralized E3 ubiquitin protein ligase 3                            | 0 | 2    |
| 15 | dehydrogenase/reductase (SDR family) member 2                       | 0 | 2.02 |
| 16 | tryptophan 2,3-dioxygenase                                          | 0 | 2.04 |
| 17 | NA                                                                  | 0 | 2.06 |
| 18 | long intergenic non-protein coding RNA 520                          | 0 | 2.07 |
| 19 | hes family bHLH transcription factor 4                              | 0 | 2.08 |
| 20 | superoxide dismutase 2, mitochondrial                               | 0 | 2.09 |
| 21 | chemokine (C-X-C motif) ligand 3                                    | 0 | 2.18 |
| 22 | VGF nerve growth factor inducible                                   | 0 | 2.32 |
| 23 | chemokine (C-C motif) ligand 18 (pulmonary and activation-regu      | 0 | 2.34 |
| 24 | phospholipase A2, group VII (platelet-activating factor acetylhyd   | 0 | 2.35 |
| 25 | NA                                                                  | 0 | 2.37 |
| 26 | chemokine (C-X-C motif) ligand 1 (melanoma growth stimulating       | 0 | 2.46 |
| 27 | NA                                                                  | 0 | 2.48 |
| 28 | oxidative stress induced growth inhibitor 1                         | 0 | 2.49 |
| 29 | coiled-coil domain containing 30                                    | 0 | 2.52 |
| 30 | sulfiredoxin 1                                                      | 0 | 2.56 |
| 31 | popeye domain containing 3                                          | 0 | 2.57 |
| 32 | chemokine (C-X-C motif) ligand 2                                    | 0 | 2.62 |
| 33 | serine peptidase inhibitor, Kazal type 1                            | 0 | 2.73 |
| 34 | NA                                                                  | 0 | 2.8  |
| 35 | chemokine (C-C motif) ligand 3-like 3                               | 0 | 3.02 |
| 36 | chemokine (C-C motif) ligand 3-like 3                               | 0 | 3.11 |
| 37 | heme oxygenase 1                                                    | 0 | 3.15 |
| 38 | chemokine (C-X-C motif) ligand 1 (melanoma growth stimulating       | 0 | 3.28 |
| 39 | chemokine (C-C motif) ligand 3                                      | 0 | 3.29 |
| 40 | solute carrier family 7 (anionic amino acid transporter light chain | 0 | 3.38 |
| 41 | heat shock 70kDa protein 1A                                         | 0 | 3.41 |
| 42 | chemokine (C-X-C motif) ligand 2                                    | 0 | 3.5  |
| 43 | metallothionein 1A                                                  | 0 | 3.57 |
| 44 | activity-regulated cytoskeleton-associated protein                  | 0 | 3.71 |
| 45 | metallothionein 1F                                                  | 0 | 3.84 |
| 46 | heat shock 70kDa protein 1B                                         | 0 | 3.93 |
| 47 | NA                                                                  | 0 | 3.95 |
| 48 | metallothionein 1L (gene/pseudogene)                                | 0 | 4.03 |
| 49 | metallothionein 1B                                                  | 0 | 4.05 |
| 50 | metallothionein 1H                                                  | 0 | 4.07 |
| 51 | NA                                                                  | 0 | 4.25 |

|    |                                                                 |          |       |
|----|-----------------------------------------------------------------|----------|-------|
| 1  |                                                                 |          |       |
| 2  | chemokine (C-X-C motif) ligand 8                                | 0        | 4.29  |
| 3  | NA                                                              | 0        | 4.43  |
| 4  | metallothionein 1E                                              | 0        | 4.49  |
| 5  | heat shock 70kDa protein 6 (HSP70B)                             | 0        | 4.73  |
| 6  | metallothionein 1H                                              | 0        | 5.03  |
| 7  | metallothionein 1X                                              | 0        | 5.53  |
| 8  | metallothionein 1M                                              | 0        | 5.54  |
| 9  | metallothionein 1G                                              | 0        | 6.83  |
| 10 | heat shock 70kDa protein 6 (HSP70B)                             | 0        | 7.33  |
| 11 | 5-nucleotidase domain containing 2                              | 0.000001 | -1.34 |
| 12 | coiled-coil domain containing 170                               | 0.000001 | -1.05 |
| 13 | JAZF zinc finger 1                                              | 0.000001 | -0.88 |
| 14 | coiled-coil domain containing 109B                              | 0.000001 | -0.76 |
| 15 | oxysterol binding protein-like 3                                | 0.000001 | -0.73 |
| 16 | ankyrin 1, erythrocytic                                         | 0.000001 | -0.72 |
| 17 | MIR503 host gene                                                | 0.000001 | -0.69 |
| 18 | protein tyrosine kinase 2                                       | 0.000001 | -0.69 |
| 19 | NA                                                              | 0.000001 | -0.67 |
| 20 | pleiomorphic adenoma gene 1                                     | 0.000001 | -0.67 |
| 21 | family with sequence similarity 64, member A                    | 0.000001 | -0.67 |
| 22 | asialoglycoprotein receptor 2                                   | 0.000001 | -0.66 |
| 23 | Rho guanine nucleotide exchange factor (GEF) 3                  | 0.000001 | -0.66 |
| 24 | adenosine A3 receptor                                           | 0.000001 | -0.61 |
| 25 | internexin neuronal intermediate filament protein, alpha        | 0.000001 | -0.61 |
| 26 | transcobalamin I (vitamin B12 binding protein, R binder family) | 0.000001 | -0.58 |
| 27 | NA                                                              | 0.000001 | 0.59  |
| 28 | neuropeptide Y                                                  | 0.000001 | 0.59  |
| 29 | adaptor-related protein complex 5, zeta 1 subunit               | 0.000001 | 0.6   |
| 30 | nicotinamide phosphoribosyltransferase                          | 0.000001 | 0.6   |
| 31 | BCL2-related protein A1                                         | 0.000001 | 0.62  |
| 32 | thioredoxin                                                     | 0.000001 | 0.62  |
| 33 | interferon-induced protein with tetratricopeptide repeats 5     | 0.000001 | 0.63  |
| 34 | CAP-GLY domain containing linker protein family, member 4       | 0.000001 | 0.64  |
| 35 | hydroxysteroid (11-beta) dehydrogenase 1                        | 0.000001 | 0.64  |
| 36 | complement component 8, gamma polypeptide                       | 0.000001 | 0.64  |
| 37 | NA                                                              | 0.000001 | 0.64  |
| 38 | erythrocyte membrane protein band 4.1-like 2                    | 0.000001 | 0.65  |
| 39 | NA                                                              | 0.000001 | 0.65  |
| 40 | NA                                                              | 0.000001 | 0.66  |
| 41 | ankyrin repeat domain 37                                        | 0.000001 | 0.66  |
| 42 | solute carrier family 17 (acidic sugar transporter), member 5   | 0.000001 | 0.66  |
| 43 | family with sequence similarity 89, member A                    | 0.000001 | 0.67  |
| 44 | calcium channel, voltage-dependent, R type, alpha 1E subunit    | 0.000001 | 0.67  |
| 45 | polyamine modulated factor 1 binding protein 1                  | 0.000001 | 0.68  |
| 46 | leucine rich repeat containing 2                                | 0.000001 | 0.7   |
| 47 | paraneoplastic Ma antigen 2                                     | 0.000001 | 0.7   |
| 48 | aspartate beta-hydroxylase                                      | 0.000001 | 0.75  |
| 49 | NA                                                              | 0.000001 | 0.77  |
| 50 | N-acylsphingosine amidohydrolase (acid ceramidase) 1            | 0.000001 | 0.79  |
| 51 | guanylate binding protein 5                                     | 0.000001 | 0.8   |

|    |                                                                     |          |       |
|----|---------------------------------------------------------------------|----------|-------|
| 1  |                                                                     |          |       |
| 2  | zinc finger protein 366                                             | 0.000001 | 0.9   |
| 3  | GTP binding protein overexpressed in skeletal muscle                | 0.000001 | 0.91  |
| 4  | NA                                                                  | 0.000001 | 0.94  |
| 5  | uncharacterized LOC644727                                           | 0.000001 | 0.97  |
| 6  | MX dynamin-like GTPase 2                                            | 0.000001 | 1     |
| 7  | heat shock 105kDa/110kDa protein 1                                  | 0.000001 | 1.03  |
| 8  | G protein-coupled receptor 35                                       | 0.000001 | 1.03  |
| 9  | NA                                                                  | 0.000001 | 1.08  |
| 10 | insulin induced gene 1                                              | 0.000001 | 1.14  |
| 11 | NA                                                                  | 0.000001 | 1.16  |
| 12 | bridging integrator 1                                               | 0.000002 | -0.97 |
| 13 | protein tyrosine phosphatase type IVA, member 3                     | 0.000002 | -0.88 |
| 14 | crystallin, beta B1                                                 | 0.000002 | -0.75 |
| 15 | leucine rich repeat containing 4                                    | 0.000002 | -0.74 |
| 16 | reversion-inducing-cysteine-rich protein with kazal motifs          | 0.000002 | -0.72 |
| 17 | transmembrane channel-like 8                                        | 0.000002 | -0.69 |
| 18 | PHD finger protein 19                                               | 0.000002 | -0.67 |
| 19 | rhopilin, Rho GTPase binding protein 1                              | 0.000002 | -0.67 |
| 20 | G-2 and S-phase expressed 1                                         | 0.000002 | -0.65 |
| 21 | ret proto-oncogene                                                  | 0.000002 | -0.62 |
| 22 | chromobox homolog 7                                                 | 0.000002 | -0.61 |
| 23 | reticulocalbin 2, EF-hand calcium binding domain                    | 0.000002 | -0.61 |
| 24 | STE20-related kinase adaptor beta                                   | 0.000002 | -0.6  |
| 25 | meteorin, glial cell differentiation regulator                      | 0.000002 | -0.59 |
| 26 | pleckstrin homology domain containing, family B (evectins) mem      | 0.000002 | 0.58  |
| 27 | NA                                                                  | 0.000002 | 0.59  |
| 28 | NA                                                                  | 0.000002 | 0.61  |
| 29 | sperm associated antigen 9                                          | 0.000002 | 0.63  |
| 30 | glycerol-3-phosphate dehydrogenase 2 (mitochondrial)                | 0.000002 | 0.65  |
| 31 | NA                                                                  | 0.000002 | 0.66  |
| 32 | RAS guanyl releasing protein 3 (calcium and DAG-regulated)          | 0.000002 | 0.68  |
| 33 | NA                                                                  | 0.000002 | 0.71  |
| 34 | kynurenine 3-monooxygenase (kynurenine 3-hydroxylase)               | 0.000002 | 0.76  |
| 35 | FK506 binding protein 4, 59kDa                                      | 0.000002 | 0.77  |
| 36 | NA                                                                  | 0.000002 | 0.78  |
| 37 | NA                                                                  | 0.000002 | 0.81  |
| 38 | baculoviral IAP repeat containing 3                                 | 0.000002 | 0.85  |
| 39 | unkempt family zinc finger-like                                     | 0.000002 | 0.91  |
| 40 | long intergenic non-protein coding RNA 1010                         | 0.000002 | 0.94  |
| 41 | neutrophil cytosolic factor 2                                       | 0.000002 | 1.01  |
| 42 | coiled-coil domain containing 172                                   | 0.000002 | 1.19  |
| 43 | ATPase, H <sup>+</sup> transporting, lysosomal 38kDa, V0 subunit d2 | 0.000002 | 1.22  |
| 44 | transmembrane protein 158 (gene/pseudogene)                         | 0.000003 | -0.8  |
| 45 | uncharacterized LOC100130417                                        | 0.000003 | -0.77 |
| 46 | eomesodermin                                                        | 0.000003 | -0.64 |
| 47 | cadherin 2, type 1, N-cadherin (neuronal)                           | 0.000003 | -0.63 |
| 48 | NA                                                                  | 0.000003 | -0.6  |
| 49 | ArfGAP with GTPase domain, ankyrin repeat and PH domain 3           | 0.000003 | 0.59  |
| 50 | CD5 molecule-like                                                   | 0.000003 | 0.62  |
| 51 | mitogen-activated protein kinase kinase kinase 8                    | 0.000003 | 0.62  |

|    |                                                                   |          |       |
|----|-------------------------------------------------------------------|----------|-------|
| 1  |                                                                   |          |       |
| 2  | spire-type actin nucleation factor 1                              | 0.000003 | 0.63  |
| 3  | diacylglycerol kinase, gamma 90kDa                                | 0.000003 | 0.63  |
| 4  | myelin protein zero-like 1                                        | 0.000003 | 0.66  |
| 5  | glycerol kinase                                                   | 0.000003 | 0.68  |
| 6  | CNKSR family member 3                                             | 0.000003 | 0.69  |
| 7  | NA                                                                | 0.000003 | 0.71  |
| 8  | long intergenic non-protein coding RNA, p53 induced transcript    | 0.000003 | 0.72  |
| 9  | interferon-induced protein with tetratricopeptide repeats 2       | 0.000003 | 0.72  |
| 10 | integrin, alpha 6                                                 | 0.000003 | 0.73  |
| 11 | NA                                                                | 0.000003 | 0.77  |
| 12 | zinc finger, FYVE domain containing 16                            | 0.000003 | 0.77  |
| 13 | solute carrier family 12, member 8                                | 0.000003 | 0.77  |
| 14 | variable charge, X-linked 2                                       | 0.000003 | 0.78  |
| 15 | glutathione reductase                                             | 0.000003 | 0.8   |
| 16 | MSC antisense RNA 1                                               | 0.000003 | 0.82  |
| 17 | NA                                                                | 0.000003 | 0.93  |
| 18 | P450 (cytochrome) oxidoreductase                                  | 0.000003 | 1.01  |
| 19 | NA                                                                | 0.000004 | -1.15 |
| 20 | secreted phosphoprotein 1                                         | 0.000004 | -1.14 |
| 21 | endothelin receptor type A                                        | 0.000004 | -1.06 |
| 22 | PDZ binding kinase                                                | 0.000004 | -0.82 |
| 23 | frizzled class receptor 1                                         | 0.000004 | -0.69 |
| 24 | pleckstrin homology domain containing, family B (evectins) mem    | 0.000004 | 0.63  |
| 25 | solute carrier family 48 (heme transporter), member 1             | 0.000004 | 0.64  |
| 26 | colony stimulating factor 1 (macrophage)                          | 0.000004 | 0.64  |
| 27 | interferon regulatory factor 7                                    | 0.000004 | 0.68  |
| 28 | solute carrier family 2 (facilitated glucose transporter), member | 0.000004 | 0.77  |
| 29 | chitinase 1 (chitotriosidase)                                     | 0.000004 | 0.8   |
| 30 | ras homolog family member Q                                       | 0.000004 | 0.86  |
| 31 | N-acetylneuraminate pyruvate lyase (dihydrodipicolinate syntha    | 0.000004 | 0.93  |
| 32 | B-cell CLL/lymphoma 3                                             | 0.000004 | 1.19  |
| 33 | platelet derived growth factor D                                  | 0.000005 | -0.71 |
| 34 | kalirin, RhoGEF kinase                                            | 0.000005 | -0.69 |
| 35 | synaptic vesicle glycoprotein 2B                                  | 0.000005 | -0.61 |
| 36 | catenin (cadherin-associated protein), alpha-like 1               | 0.000005 | -0.6  |
| 37 | collagen, type IV, alpha 3 (Goodpasture antigen) binding protein  | 0.000005 | 0.59  |
| 38 | poly (ADP-ribose) polymerase family, member 9                     | 0.000005 | 0.62  |
| 39 | HECT and RLD domain containing E3 ubiquitin protein ligase 5      | 0.000005 | 0.63  |
| 40 | BEN domain containing 6                                           | 0.000005 | 0.68  |
| 41 | ISG15 ubiquitin-like modifier                                     | 0.000005 | 0.73  |
| 42 | NA                                                                | 0.000005 | 0.74  |
| 43 | proenkephalin                                                     | 0.000005 | 0.76  |
| 44 | NA                                                                | 0.000005 | 0.8   |
| 45 | Ras-related GTP binding D                                         | 0.000006 | 0.58  |
| 46 | transcription factor EC                                           | 0.000006 | 0.63  |
| 47 | STXBP5 antisense RNA 1                                            | 0.000006 | 0.69  |
| 48 | adenosine monophosphate deaminase 3                               | 0.000006 | 0.7   |
| 49 | thrombospondin 2                                                  | 0.000007 | -1    |
| 50 | purinergic receptor P2Y, G-protein coupled, 12                    | 0.000007 | -0.88 |
| 51 | anthrax toxin receptor 1                                          | 0.000007 | -0.84 |

|    |                                                              |          |       |
|----|--------------------------------------------------------------|----------|-------|
| 1  |                                                              |          |       |
| 2  | NA                                                           | 0.000007 | -0.79 |
| 3  | tubulin, alpha 4a                                            | 0.000007 | -0.72 |
| 4  | NUAK family, SNF1-like kinase, 2                             | 0.000007 | -0.69 |
| 5  | SPARC-like 1 (hevin)                                         | 0.000007 | -0.66 |
| 6  | MAX dimerization protein 3                                   | 0.000007 | -0.58 |
| 7  | NA                                                           | 0.000007 | 0.58  |
| 8  | NA                                                           | 0.000007 | 0.64  |
| 9  | cytochrome b5 reductase 1                                    | 0.000007 | 0.65  |
| 10 | bone morphogenetic protein 6                                 | 0.000007 | 0.67  |
| 11 | ferritin, light polypeptide                                  | 0.000007 | 0.78  |
| 12 | signal transducer and activator of transcription 1, 91kDa    | 0.000007 | 0.8   |
| 13 | selenoprotein P, plasma, 1                                   | 0.000008 | -0.88 |
| 14 | NA                                                           | 0.000008 | -0.76 |
| 15 | spinster homolog 3 (Drosophila)                              | 0.000008 | -0.65 |
| 16 | NA                                                           | 0.000008 | 0.6   |
| 17 | trio Rho guanine nucleotide exchange factor                  | 0.000008 | 0.6   |
| 18 | lipoma HMGIC fusion partner-like 2                           | 0.000008 | 0.62  |
| 19 | nuclear receptor subfamily 4, group A, member 2              | 0.000008 | 0.63  |
| 20 | proteasome 26S subunit, non-ATPase 1                         | 0.000008 | 0.66  |
| 21 | activating transcription factor 3                            | 0.000008 | 0.74  |
| 22 | ferritin, light polypeptide                                  | 0.000008 | 0.77  |
| 23 | NA                                                           | 0.000008 | 0.92  |
| 24 | carboxypeptidase E                                           | 0.000009 | -0.78 |
| 25 | NA                                                           | 0.000009 | -0.68 |
| 26 | NA                                                           | 0.000009 | 0.66  |
| 27 | 2-5-oligoadenylate synthetase 3, 100kDa                      | 0.000009 | 0.85  |
| 28 | caveolin 1, caveolae protein, 22kDa                          | 0.00001  | -0.78 |
| 29 | NA                                                           | 0.00001  | -0.77 |
| 30 | chromosome 16 open reading frame 74                          | 0.00001  | -0.63 |
| 31 | signal-induced proliferation-associated 1 like 2             | 0.00001  | 0.6   |
| 32 | family with sequence similarity 213, member B                | 0.00001  | 0.61  |
| 33 | pre-B-cell leukemia homeobox 4                               | 0.00001  | 0.62  |
| 34 | anoctamin 3                                                  | 0.00001  | 0.68  |
| 35 | methyltransferase like 1                                     | 0.000011 | 0.69  |
| 36 | transmembrane protein 138                                    | 0.000011 | 0.72  |
| 37 | zinc finger, AN1-type domain 5                               | 0.000011 | 0.73  |
| 38 | interferon, alpha-inducible protein 27                       | 0.000011 | 0.85  |
| 39 | NA                                                           | 0.000012 | -0.62 |
| 40 | tripartite motif containing 22                               | 0.000013 | 0.66  |
| 41 | dendrocyte expressed seven transmembrane protein             | 0.000013 | 0.71  |
| 42 | SOGA family member 3                                         | 0.000013 | 0.82  |
| 43 | NA                                                           | 0.000013 | 1.1   |
| 44 | myristoylated alanine-rich protein kinase C substrate        | 0.000014 | 0.83  |
| 45 | matrix metalloproteinase 1                                   | 0.000015 | -1.68 |
| 46 | DnaJ (Hsp40) homolog, subfamily C, member 5 beta             | 0.000015 | 0.59  |
| 47 | NA                                                           | 0.000015 | 0.61  |
| 48 | mastermind-like domain containing 1                          | 0.000015 | 0.67  |
| 49 | intraflagellar transport 122 homolog (Chlamydomonas) pseudog | 0.000016 | 0.76  |
| 50 | chemokine (C-X-C motif) ligand 14                            | 0.000016 | 0.8   |
| 51 | CD163 molecule                                               | 0.000017 | -0.86 |



|    |                                                              |          |       |
|----|--------------------------------------------------------------|----------|-------|
| 1  |                                                              |          |       |
| 2  | NA                                                           | 0.000017 | 0.77  |
| 3  | collagen, type VI, alpha 1                                   | 0.000017 | 0.91  |
| 4  | brain abundant, membrane attached signal protein 1           | 0.000018 | 0.58  |
| 5  | kynureninase                                                 | 0.000018 | 0.79  |
| 6  | NA                                                           | 0.000018 | 0.8   |
| 7  | formimidoyltransferase cyclodeaminase                        | 0.000019 | 0.74  |
| 8  | phosphogluconate dehydrogenase                               | 0.000019 | 1.06  |
| 9  | chromosome 1 open reading frame 106                          | 0.00002  | -0.66 |
| 10 | oxysterol binding protein-like 3                             | 0.00002  | -0.64 |
| 11 | Ras protein-specific guanine nucleotide-releasing factor 1   | 0.00002  | 0.6   |
| 12 | NA                                                           | 0.00002  | 0.62  |
| 13 | chemokine (C-X-C motif) ligand 10                            | 0.00002  | 1.18  |
| 14 | vascular endothelial growth factor C                         | 0.000021 | -0.88 |
| 15 | killer cell lectin-like receptor subfamily C, member 3       | 0.000021 | -0.72 |
| 16 | gap junction protein, delta 3, 31.9kDa                       | 0.000021 | 0.75  |
| 17 | regulator of G-protein signaling 20                          | 0.000021 | 0.78  |
| 18 | endothelin 1                                                 | 0.000023 | -0.69 |
| 19 | V-set and immunoglobulin domain containing 4                 | 0.000024 | -0.83 |
| 20 | biliverdin reductase B                                       | 0.000024 | 0.66  |
| 21 | polo-like kinase 3                                           | 0.000024 | 0.69  |
| 22 | discs, large homolog 3 (Drosophila)                          | 0.000026 | -0.78 |
| 23 | cathepsin C                                                  | 0.000026 | -0.66 |
| 24 | cytoskeleton associated protein 2-like                       | 0.000027 | -0.66 |
| 25 | proteolipid protein 2 (colonic epithelium-enriched)          | 0.000027 | -0.63 |
| 26 | glutathione peroxidase 1                                     | 0.000027 | -0.6  |
| 27 | pleckstrin                                                   | 0.000027 | 0.61  |
| 28 | tyrosyl-DNA phosphodiesterase 2                              | 0.000027 | 0.61  |
| 29 | myeloid leukemia factor 1                                    | 0.000028 | 0.58  |
| 30 | neural proliferation, differentiation and control, 1         | 0.000029 | -0.61 |
| 31 | carbonic anhydrase VB, mitochondrial                         | 0.00003  | -0.59 |
| 32 | splA/ryanodine receptor domain and SOCS box containing 1     | 0.00003  | 0.63  |
| 33 | N-myristoyltransferase 2                                     | 0.00003  | 0.65  |
| 34 | CD14 molecule                                                | 0.000031 | -1.26 |
| 35 | aldo-keto reductase family 1, member A1 (aldehyde reductase) | 0.000031 | 0.63  |
| 36 | lymphocyte antigen 96                                        | 0.000031 | 0.65  |
| 37 | 2-5-oligoadenylate synthetase 2, 69/71kDa                    | 0.000032 | 0.59  |
| 38 | ferritin, light polypeptide                                  | 0.000032 | 0.71  |
| 39 | NA                                                           | 0.000033 | -0.66 |
| 40 | dystrophin myotonia-protein kinase                           | 0.000033 | -0.6  |
| 41 | kinesin family member 1B                                     | 0.000033 | 0.63  |
| 42 | Fc fragment of IgG, low affinity IIIa, receptor (CD16a)      | 0.000033 | 0.65  |
| 43 | integrin, beta 3 (platelet glycoprotein IIIa, antigen CD61)  | 0.000034 | 0.75  |
| 44 | SAGA complex associated factor 29 pseudogene                 | 0.000034 | 0.75  |
| 45 | NA                                                           | 0.000034 | 0.94  |
| 46 | spermatogenesis associated 13                                | 0.000034 | 0.96  |
| 47 | ADAM-like, decysin 1                                         | 0.000035 | 1.25  |
| 48 | integral membrane protein 2C                                 | 0.000036 | -1    |
| 49 | NA                                                           | 0.000037 | 0.88  |
| 50 | sphingosine-1-phosphate receptor 1                           | 0.000039 | -0.79 |
| 51 | NA                                                           | 0.000039 | 0.61  |



|    |                                                                       |          |       |
|----|-----------------------------------------------------------------------|----------|-------|
| 1  |                                                                       |          |       |
| 2  | calmodulin regulated spectrin-associated protein family, member 1     | 0.000039 | 0.67  |
| 3  | sperm associated antigen 9                                            | 0.000039 | 0.69  |
| 4  | neutrophil cytosolic factor 1                                         | 0.000039 | 0.73  |
| 5  | interleukin 32                                                        | 0.000039 | 1.05  |
| 6  | neurotensin                                                           | 0.00004  | -1.29 |
| 7  | optineurin                                                            | 0.000042 | 0.62  |
| 8  | protocadherin 12                                                      | 0.000043 | -0.59 |
| 9  | tumor necrosis factor receptor superfamily, member 8                  | 0.000043 | 0.62  |
| 10 | wntless Wnt ligand secretion mediator                                 | 0.000044 | -0.66 |
| 11 | triggering receptor expressed on myeloid cells-like 2                 | 0.000044 | -0.59 |
| 12 | interferon-induced protein with tetratricopeptide repeats 3           | 0.000044 | 0.75  |
| 13 | spermatogenesis associated, serine-rich 1                             | 0.000045 | 0.63  |
| 14 | ATP-binding cassette, sub-family C (CFTR/MRP), member 1               | 0.000045 | 0.71  |
| 15 | myotubularin related protein 11                                       | 0.000046 | -0.66 |
| 16 | low density lipoprotein receptor-related protein 8, apolipoprotein    | 0.000046 | 0.58  |
| 17 | NA                                                                    | 0.000046 | 0.66  |
| 18 | lymphoid enhancer-binding factor 1                                    | 0.000048 | -0.78 |
| 19 | YME1-like 1 ATPase                                                    | 0.000048 | -0.66 |
| 20 | retinol binding protein 7, cellular                                   | 0.000048 | -0.6  |
| 21 | cytochrome b561 family, member A3                                     | 0.000049 | 0.66  |
| 22 | NA                                                                    | 0.00005  | 0.61  |
| 23 | acid sensing (proton gated) ion channel 1                             | 0.000051 | -0.7  |
| 24 | NA                                                                    | 0.000053 | -0.66 |
| 25 | sialic acid acetyltransferase                                         | 0.000057 | -0.89 |
| 26 | killer cell lectin-like receptor subfamily C, member 1                | 0.000057 | -0.77 |
| 27 | proteasome 26S subunit, non-ATPase 11                                 | 0.000059 | 0.69  |
| 28 | fibroblast growth factor 13                                           | 0.00006  | 0.63  |
| 29 | achaete-scute family bHLH transcription factor 2                      | 0.00006  | 0.68  |
| 30 | guanine nucleotide binding protein (G protein), alpha inhibiting 2    | 0.000064 | -0.76 |
| 31 | dual specificity phosphatase 2                                        | 0.000064 | 0.77  |
| 32 | protein phosphatase, Mg <sup>2+</sup> /Mn <sup>2+</sup> dependent, 1J | 0.000067 | -0.58 |
| 33 | topoisomerase (DNA) II alpha                                          | 0.00007  | -0.69 |
| 34 | NA                                                                    | 0.00007  | 0.6   |
| 35 | butyrobetaine (gamma), 2-oxoglutarate dioxygenase (gamma-bu           | 0.000071 | -0.84 |
| 36 | kinesin family member 23                                              | 0.000071 | -0.58 |
| 37 | long intergenic non-protein coding RNA 1160                           | 0.000072 | -0.67 |
| 38 | protein phosphatase methylesterase 1                                  | 0.000073 | 0.59  |
| 39 | ZFP36 ring finger protein-like 1                                      | 0.000074 | -0.58 |
| 40 | NA                                                                    | 0.000074 | 0.91  |
| 41 | homer scaffolding protein 2                                           | 0.000077 | -0.77 |
| 42 | monocyte to macrophage differentiation-associated                     | 0.000078 | -0.65 |
| 43 | long intergenic non-protein coding RNA 926                            | 0.000079 | 0.82  |
| 44 | fibrillin 2                                                           | 0.000083 | -0.68 |
| 45 | ArfGAP with RhoGAP domain, ankyrin repeat and PH domain 3             | 0.000095 | -0.69 |
| 46 | splA/ryanodine receptor domain and SOCS box containing 1              | 0.000096 | 0.66  |
| 47 | transmembrane protein 38B                                             | 0.0001   | 0.58  |
| 48 | tripartite motif containing 58                                        | 0.000102 | -0.63 |
| 49 | TIMP metalloproteinase inhibitor 1                                    | 0.000103 | -0.61 |
| 50 | toll-like receptor 7                                                  | 0.000105 | -0.65 |
| 51 | family with sequence similarity 26, member F                          | 0.000106 | -0.6  |

|    |                                                                        |          |       |
|----|------------------------------------------------------------------------|----------|-------|
| 1  |                                                                        |          |       |
| 2  | syntaxin 1A (brain)                                                    | 0.000107 | -0.61 |
| 3  | zinc finger protein 385B                                               | 0.000108 | -0.71 |
| 4  | tubulin, alpha 4a                                                      | 0.000108 | -0.63 |
| 5  | NA                                                                     | 0.00011  | -0.64 |
| 6  | leucine-rich repeat LIG family, member 2                               | 0.000112 | -1.09 |
| 7  | transmembrane protein 2                                                | 0.000117 | -0.73 |
| 8  | intercellular adhesion molecule 3                                      | 0.000119 | -0.67 |
| 9  | receptor tyrosine kinase-like orphan receptor 2                        | 0.000121 | 0.59  |
| 10 | cysteine and histidine-rich domain (CHORD) containing 1                | 0.000121 | 0.62  |
| 11 | ATPase, H <sup>+</sup> transporting, lysosomal 56/58kDa, V1 subunit B2 | 0.000122 | 0.58  |
| 12 | endothelin receptor type B                                             | 0.000123 | 0.67  |
| 13 | neutrophil cytosolic factor 1                                          | 0.000123 | 0.9   |
| 14 | FK506 binding protein 4, 59kDa                                         | 0.000133 | 0.62  |
| 15 | integrin, alpha 6                                                      | 0.000133 | 0.63  |
| 16 | chondrolectin                                                          | 0.000135 | -0.65 |
| 17 | mitogen-activated protein kinase kinase kinase 2                       | 0.000135 | 0.61  |
| 18 | NA                                                                     | 0.000135 | 0.8   |
| 19 | neutrophil cytosolic factor 1                                          | 0.000136 | 0.8   |
| 20 | prickle homolog 1                                                      | 0.000137 | -0.63 |
| 21 | NA                                                                     | 0.000144 | 0.6   |
| 22 | G protein-coupled receptor 88                                          | 0.000145 | -0.93 |
| 23 | T-cell immunoglobulin and mucin domain containing 4                    | 0.000151 | -0.63 |
| 24 | glycoprotein (transmembrane) nmb                                       | 0.000153 | 0.63  |
| 25 | Myb/SANT-like DNA-binding domain containing 3                          | 0.000154 | 0.61  |
| 26 | solute carrier family 38, member 6                                     | 0.000161 | 0.6   |
| 27 | activating transcription factor 5                                      | 0.000162 | 0.64  |
| 28 | proline rich 5 like                                                    | 0.000175 | -0.69 |
| 29 | polo-like kinase 2                                                     | 0.000176 | -1.03 |
| 30 | interleukin 18 binding protein                                         | 0.000177 | 0.6   |
| 31 | zinc finger, BED-type containing 3                                     | 0.000178 | 0.65  |
| 32 | NA                                                                     | 0.000185 | 0.94  |
| 33 | leukocyte immunoglobulin-like receptor, subfamily B (with TM a         | 0.000188 | 0.64  |
| 34 | NA                                                                     | 0.000191 | -0.61 |
| 35 | discs, large (Drosophila) homolog-associated protein 5                 | 0.000191 | -0.58 |
| 36 | sulfide quinone reductase-like (yeast)                                 | 0.000191 | 0.67  |
| 37 | NA                                                                     | 0.000193 | -0.6  |
| 38 | killer cell lectin-like receptor subfamily C, member 4                 | 0.000196 | -0.96 |
| 39 | phosphoribosyl pyrophosphate synthetase 1                              | 0.000198 | -0.64 |
| 40 | TAF15 RNA polymerase II, TATA box binding protein (TBP)-associ         | 0.000198 | -0.58 |
| 41 | selenoprotein N, 1                                                     | 0.000206 | -0.69 |
| 42 | oxytocin receptor                                                      | 0.000212 | -0.83 |
| 43 | NA                                                                     | 0.000212 | 0.58  |
| 44 | spermatogenesis associated 13                                          | 0.000221 | 0.59  |
| 45 | calsyntenin 3                                                          | 0.000223 | -0.78 |
| 46 | NA                                                                     | 0.000232 | 0.64  |
| 47 | Ras-like without CAAX 1                                                | 0.000237 | 1     |
| 48 | angiopoietin 1                                                         | 0.00024  | -0.66 |
| 49 | glutamate receptor, metabotropic 8                                     | 0.000242 | 0.68  |
| 50 | NA                                                                     | 0.000253 | 0.67  |
| 51 | NA                                                                     | 0.000257 | 0.65  |

|    |                                                                 |          |       |
|----|-----------------------------------------------------------------|----------|-------|
| 1  |                                                                 |          |       |
| 2  | immediate early response 3                                      | 0.000262 | 0.67  |
| 3  | nuclear receptor subfamily 5, group A, member 2                 | 0.000266 | -0.69 |
| 4  | NA                                                              | 0.000274 | 0.8   |
| 5  | DnaJ (Hsp40) homolog, subfamily B, member 4                     | 0.000288 | 0.58  |
| 6  | adrenoceptor beta 1                                             | 0.000294 | -0.62 |
| 7  | NA                                                              | 0.000294 | 0.64  |
| 8  | four jointed box 1                                              | 0.000302 | -0.67 |
| 9  | interferon stimulated exonuclease gene 20kDa                    | 0.000312 | 0.61  |
| 10 | CD164 molecule, sialomucin                                      | 0.000316 | -0.79 |
| 11 | tescalcin                                                       | 0.000328 | -0.58 |
| 12 | microphthalmia-associated transcription factor                  | 0.000329 | 0.72  |
| 13 | CD19 molecule                                                   | 0.000342 | 0.69  |
| 14 | Fc fragment of IgM receptor                                     | 0.000359 | -0.67 |
| 15 | ribonuclease, RNase A family, 1 (pancreatic)                    | 0.00038  | -0.66 |
| 16 | hes-related family bHLH transcription factor with YRPW motif 2  | 0.000392 | -0.99 |
| 17 | NA                                                              | 0.000392 | 0.8   |
| 18 | small ILF3/NF90-associated RNA A3                               | 0.000393 | 0.62  |
| 19 | cell migration inducing protein, hyaluronan binding             | 0.000398 | -0.92 |
| 20 | myoglobin                                                       | 0.0004   | -0.7  |
| 21 | activating transcription factor 3                               | 0.000404 | 0.65  |
| 22 | RAS p21 protein activator (GTPase activating protein) 1         | 0.00042  | -0.69 |
| 23 | sestrin 1                                                       | 0.00042  | -0.58 |
| 24 | Kruppel-like factor 12                                          | 0.000426 | -0.58 |
| 25 | NA                                                              | 0.00045  | 0.91  |
| 26 | hexokinase 3 (white cell)                                       | 0.000474 | -0.59 |
| 27 | fms-related tyrosine kinase 3                                   | 0.00048  | -0.61 |
| 28 | microphthalmia-associated transcription factor                  | 0.000482 | 0.65  |
| 29 | absent in melanoma 2                                            | 0.000486 | -0.63 |
| 30 | sparc/osteonectin, cwcv and kazal-like domains proteoglycan (te | 0.000503 | -0.66 |
| 31 | ferritin, heavy polypeptide-like 17                             | 0.00053  | 0.67  |
| 32 | immunoglobulin superfamily, member 6                            | 0.000532 | 0.71  |
| 33 | NA                                                              | 0.000553 | -0.59 |
| 34 | metallothionein 2A                                              | 0.000563 | 2.68  |
| 35 | complement factor properdin                                     | 0.00058  | -0.74 |
| 36 | choroideremia (Rab escort protein 1)                            | 0.000597 | 0.58  |
| 37 | NA                                                              | 0.000599 | -0.79 |
| 38 | integrin, alpha 1                                               | 0.000604 | -0.69 |
| 39 | NA                                                              | 0.000682 | 0.62  |
| 40 | 3-hydroxy-3-methylglutaryl-CoA synthase 1 (soluble)             | 0.000683 | 0.65  |
| 41 | NA                                                              | 0.000695 | 0.7   |
| 42 | LON peptidase N-terminal domain and ring finger 2               | 0.000704 | -0.62 |
| 43 | RasGEF domain family, member 1B                                 | 0.000717 | 0.83  |
| 44 | S100 calcium binding protein A9                                 | 0.000752 | -0.86 |
| 45 | solute carrier family 4, sodium bicarbonate cotransporter, mem  | 0.000799 | -0.58 |
| 46 | drebrin 1                                                       | 0.0008   | -0.64 |
| 47 | immediate early response 3                                      | 0.000819 | 0.59  |
| 48 | NA                                                              | 0.00083  | 0.93  |
| 49 | NA                                                              | 0.000916 | 0.58  |
| 50 | Rho GTPase activating protein 6                                 | 0.000945 | -0.66 |
| 51 | nicotinamide phosphoribosyltransferase                          | 0.000956 | 0.67  |

|    |                                                                 |          |       |
|----|-----------------------------------------------------------------|----------|-------|
| 1  |                                                                 |          |       |
| 2  | sorting nexin 9                                                 | 0.000985 | 0.65  |
| 3  | neuralized E3 ubiquitin protein ligase 1B                       | 0.001007 | -0.58 |
| 4  | potassium channel, voltage gated KQT-like subfamily Q, member   | 0.001032 | -0.69 |
| 5  | kelch-like family member 6                                      | 0.001129 | 0.65  |
| 6  | caveolin 1, caveolae protein, 22kDa                             | 0.001181 | -0.68 |
| 7  | 2-5-oligoadenylate synthetase 2, 69/71kDa                       | 0.001205 | 0.69  |
| 8  | tRNA methyltransferase 2 homolog B                              | 0.001362 | -0.58 |
| 9  | aldo-keto reductase family 1, member B10 (aldose reductase)     | 0.001387 | 0.83  |
| 10 | galactose mutarotase (aldose 1-epimerase)                       | 0.001479 | 0.65  |
| 11 | NA                                                              | 0.001495 | 0.62  |
| 12 | pepsinogen 3, group I (pepsinogen A)                            | 0.001501 | -0.58 |
| 13 | peripheral myelin protein 22                                    | 0.001613 | 0.59  |
| 14 | ABL proto-oncogene 2, non-receptor tyrosine kinase              | 0.001921 | 0.75  |
| 15 | lamin B1                                                        | 0.001998 | -0.83 |
| 16 | chemokine (C-X-C motif) ligand 10                               | 0.002036 | 0.65  |
| 17 | G0/G1 switch 2                                                  | 0.002063 | 0.72  |
| 18 | ferritin, heavy polypeptide 1                                   | 0.00219  | 0.68  |
| 19 | acid sensing (proton gated) ion channel family member 4         | 0.002305 | 0.63  |
| 20 | ATP-binding cassette, sub-family A (ABC1), member 1             | 0.002319 | 0.66  |
| 21 | guanylate cyclase 1, soluble, alpha 2                           | 0.002374 | 0.62  |
| 22 | centromere protein F, 350/400kDa                                | 0.002394 | -0.69 |
| 23 | matrix metalloproteinase 14 (membrane-inserted)                 | 0.002465 | -0.76 |
| 24 | transmembrane protein 119                                       | 0.002488 | 0.75  |
| 25 | transmembrane p24 trafficking protein 9                         | 0.003178 | -0.63 |
| 26 | copine II                                                       | 0.003558 | -0.65 |
| 27 | NA                                                              | 0.003613 | 0.59  |
| 28 | nerve growth factor receptor                                    | 0.003769 | -0.61 |
| 29 | solute carrier family 39 (zinc transporter), member 10          | 0.003797 | -0.85 |
| 30 | pentraxin 3, long                                               | 0.003845 | 0.59  |
| 31 | NA                                                              | 0.003925 | 0.7   |
| 32 | Rab interacting lysosomal protein-like 1                        | 0.003954 | 0.59  |
| 33 | v-ets avian erythroblastosis virus E26 oncogene homolog 1       | 0.004029 | -0.71 |
| 34 | nuclear factor I/C (CCAAT-binding transcription factor)         | 0.004148 | 0.6   |
| 35 | NA                                                              | 0.004346 | 0.63  |
| 36 | peroxisome proliferator-activated receptor gamma, coactivator 1 | 0.004535 | 0.75  |
| 37 | NA                                                              | 0.005005 | -0.69 |
| 38 | NA                                                              | 0.005152 | 0.7   |
| 39 | zinc finger, CCHC domain containing 2                           | 0.005204 | 0.6   |
| 40 | interferon-induced protein 44                                   | 0.005302 | 0.85  |
| 41 | S100 calcium binding protein A16                                | 0.005643 | -0.58 |
| 42 | small nucleolar RNA, H/ACA box 74B                              | 0.005844 | 0.61  |
| 43 | neuronal regeneration related protein                           | 0.006132 | -0.61 |
| 44 | prepronociceptin                                                | 0.006309 | -0.72 |
| 45 | NA                                                              | 0.006616 | 0.64  |
| 46 | NA                                                              | 0.007861 | 0.87  |
| 47 | minichromosome maintenance complex component 5                  | 0.008133 | -0.59 |
| 48 | platelet-derived growth factor receptor-like                    | 0.008204 | -0.58 |
| 49 | shisa family member 5                                           | 0.008343 | 0.62  |
| 50 | NA                                                              | 0.008406 | 1.1   |
| 51 | galactose mutarotase (aldose 1-epimerase)                       | 0.00868  | 0.67  |

|    |                                                                  |                 |              |
|----|------------------------------------------------------------------|-----------------|--------------|
| 1  |                                                                  |                 |              |
| 2  | poly (ADP-ribose) polymerase family, member 14                   | <b>0.008894</b> | <b>0.7</b>   |
| 3  | establishment of sister chromatid cohesion N-acetyltransferase 2 | <b>0.009125</b> | <b>-0.58</b> |
| 4  | neutrophil cytosolic factor 1                                    | <b>0.00939</b>  | <b>0.6</b>   |
| 5  | DENN/MADD domain containing 1B                                   | <b>0.009701</b> | <b>-0.78</b> |
| 6  | DnaJ (Hsp40) homolog, subfamily C, member 7                      | <b>0.010648</b> | <b>-0.58</b> |
| 7  | aspartate beta-hydroxylase                                       | <b>0.012066</b> | <b>0.61</b>  |
| 8  | NA                                                               | <b>0.012068</b> | <b>0.65</b>  |
| 9  | Ras-related GTP binding C                                        | <b>0.012456</b> | <b>0.63</b>  |
| 10 | complement component 5a receptor 1                               | <b>0.013322</b> | <b>0.82</b>  |
| 11 | NA                                                               | <b>0.013763</b> | <b>-0.58</b> |
| 12 | NA                                                               | <b>0.014242</b> | <b>0.64</b>  |
| 13 | prolyl 3-hydroxylase 2                                           | <b>0.015349</b> | <b>0.67</b>  |
| 14 | thymidylate synthetase                                           | <b>0.01648</b>  | <b>-0.62</b> |
| 15 | ADAM metalloproteinase with thrombospondin type 1 motif, 4       | <b>0.017577</b> | <b>-0.62</b> |
| 16 | heat shock protein 90kDa alpha (cytosolic), class B member 2, ps | <b>0.018346</b> | <b>0.89</b>  |
| 17 | NA                                                               | <b>0.022499</b> | <b>0.82</b>  |
| 18 | ferritin, heavy polypeptide 1                                    | <b>0.024846</b> | <b>0.59</b>  |
| 19 | heat shock protein 90kDa alpha (cytosolic), class A member 1     | <b>0.024978</b> | <b>0.73</b>  |
| 20 | insulin-like growth factor binding protein 3                     | <b>0.02746</b>  | <b>0.58</b>  |
| 21 | tachykinin 4 (hemokinin)                                         | <b>0.03595</b>  | <b>-0.59</b> |
| 22 | NA                                                               | <b>0.036088</b> | <b>0.58</b>  |
| 23 | chondroitin sulfate synthase 3                                   | <b>0.039112</b> | <b>-0.6</b>  |
| 24 | NA                                                               | <b>0.039244</b> | <b>0.61</b>  |
| 25 | CD84 molecule                                                    | <b>0.046833</b> | <b>0.68</b>  |
| 26 | DPP9 antisense RNA 1                                             | <b>0.047776</b> | <b>0.61</b>  |
| 27 | heat shock protein 90kDa alpha (cytosolic), class A member 2, ps | <b>0.048493</b> | <b>0.78</b>  |
| 28 |                                                                  |                 |              |
| 29 |                                                                  |                 |              |
| 30 |                                                                  |                 |              |
| 31 |                                                                  |                 |              |
| 32 |                                                                  |                 |              |
| 33 |                                                                  |                 |              |
| 34 |                                                                  |                 |              |
| 35 |                                                                  |                 |              |
| 36 |                                                                  |                 |              |
| 37 |                                                                  |                 |              |
| 38 |                                                                  |                 |              |
| 39 |                                                                  |                 |              |
| 40 |                                                                  |                 |              |
| 41 |                                                                  |                 |              |
| 42 |                                                                  |                 |              |
| 43 |                                                                  |                 |              |
| 44 |                                                                  |                 |              |
| 45 |                                                                  |                 |              |
| 46 |                                                                  |                 |              |
| 47 |                                                                  |                 |              |
| 48 |                                                                  |                 |              |
| 49 |                                                                  |                 |              |
| 50 |                                                                  |                 |              |
| 51 |                                                                  |                 |              |
| 52 |                                                                  |                 |              |
| 53 |                                                                  |                 |              |
| 54 |                                                                  |                 |              |
| 55 |                                                                  |                 |              |
| 56 |                                                                  |                 |              |
| 57 |                                                                  |                 |              |
| 58 |                                                                  |                 |              |
| 59 |                                                                  |                 |              |
| 60 |                                                                  |                 |              |

**Exposure: 24h Silver ions (nitric acid silver)**

| Probe ID      | TargetID        | GeneSymbol |
|---------------|-----------------|------------|
| A_23_P1691    | NM_002421       | MMP1       |
| A_23_P324754  | NM_018689       | CEMIP      |
| A_23_P83579   | NM_014862       | ARNT2      |
| A_33_P3258046 | NM_170685       | TAC4       |
| A_33_P3333232 | ENST00000621947 | CCDC162P   |
| A_23_P20660   | ENST00000375765 | DIRAS2     |
| A_23_P36882   | NM_006183       | NTS        |
| A_23_P214080  | NM_001964       | EGR1       |
| A_23_P95930   | NM_003483       | HMGA2      |
| A_24_P363408  | NM_012259       | HEY2       |
| A_33_P3380457 | NM_022049       | GPR88      |
| A_23_P215060  | NM_001018111    | PODXL      |
| A_23_P404494  | NM_002185       | IL7R       |
| A_23_P402765  | NM_198060       | NRAP       |
| A_23_P120227  | NM_030915       | LBH        |
| A_23_P320578  | NM_002928       | RGS16      |
| A_33_P3413741 | NM_000916       | OXTR       |
| A_23_P50919   | NM_006216       | SERPINE2   |
| A_23_P114947  | NM_002923       | RGS2       |
| A_23_P54144   | NM_001202       | BMP4       |
| A_33_P3361636 | NM_001190839    | MGP        |
| A_23_P204286  | NM_000900       | MGP        |
| A_23_P30254   | NM_006622       | PLK2       |
| A_23_P39931   | NM_003494       | DYSF       |
| A_33_P3303649 | NM_203377       | MB         |
| A_23_P360754  | NM_005099       | ADAMTS4    |
| A_23_P253321  | NM_006228       | PNOC       |
| A_23_P66948   | NM_022751       | GAREM      |
| A_23_P97141   | NM_002922       | RGS1       |
| A_24_P709377  | NR_015377       | PAX8-AS1   |
| A_23_P103672  | NM_006617       | NES        |
| A_23_P16523   | NM_004864       | GDF15      |
| A_32_P190303  | NM_198461       | LONRF2     |
| A_23_P147918  | NM_080388       | S100A16    |
| A_23_P254507  | NM_139211       | HOPX       |
| A_23_P46936   | NM_000399       | EGR2       |
| A_23_P57277   | NM_020152       | MAP3K7CL   |
| A_33_P3216442 | NM_080680       | COL11A2    |
| A_33_P3290394 | NM_000206       | IL2RG      |
| A_33_P3315906 | NM_032611       | PTP4A3     |
| A_21_P0000160 | NM_138461       | TM4SF19    |
| A_24_P406754  | NM_032211       | LOXL4      |
| A_23_P205031  | NM_001846       | COL4A2     |
| A_23_P151046  | NM_002259       | KLRC1      |
| A_24_P208909  | NM_015271       | TRIM2      |
| A_33_P3358233 | NM_006617       | NES        |
| A_33_P3391290 | NM_001142483    | NREP       |

|    |                |                 |              |
|----|----------------|-----------------|--------------|
| 1  |                |                 |              |
| 2  | A_23_P146811   | NM_030793       | FBXO38       |
| 3  | A_23_P17663    | NM_002462       | MX1          |
| 4  | A_23_P310460   | NM_153487       | MDGA1        |
| 5  | A_23_P389897   | NM_002507       | NGFR         |
| 6  | A_33_P3372666  | NM_033023       | PDGFA        |
| 7  | A_23_P122924   | NM_002192       | INHBA        |
| 8  | A_23_P24716    | NM_017870       | TMEM132A     |
| 9  | A_23_P43898    | NM_173567       | EPHX4        |
| 10 | A_24_P49199    | NM_181789       | GLDN         |
| 11 | A_33_P3227375  | NM_003247       | THBS2        |
| 12 | A_23_P121665   | NM_020777       | SORCS2       |
| 13 | A_23_P150018   | NM_004419       | DUSP5        |
| 14 | A_23_P99906    | NM_199330       | HOMER2       |
| 15 | A_32_P2452     | NM_175861       | TMTC1        |
| 16 | A_23_P128598   | NM_006001       | TUBA3C       |
| 17 | A_23_P202837   | NM_053056       | CCND1        |
| 18 | A_23_P213562   | NM_001992       | F2R          |
| 19 | A_32_P59302    | NM_024503       | HIVEP3       |
| 20 | A_33_P3783812  | AK022255        | C8orf60      |
| 21 | A_23_P165333   | NM_139346       | BIN1         |
| 22 | A_23_P215525   | NM_015550       | OSBPL3       |
| 23 | A_23_P76488    | NM_001423       | EMP1         |
| 24 | A_23_P86470    | NM_003956       | CH25H        |
| 25 | A_24_P12626    | NM_001753       | CAV1         |
| 26 | A_32_P83049    | NM_014971       | EFR3B        |
| 27 | A_21_P0013034  | ENST00000368966 | CCDC162P     |
| 28 | A_23_P112774   | NM_032611       | PTP4A3       |
| 29 | A_23_P150693   | NM_014344       | FJX1         |
| 30 | A_23_P372946   | NM_138461       | TM4SF19      |
| 31 | A_23_P435407   | NM_001448       | GPC4         |
| 32 | A_23_P500130   | NM_153186       | KANK1        |
| 33 | A_23_P122976   | NM_002069       | GNAI1        |
| 34 | A_23_P127495   | NM_003986       | BBOX1        |
| 35 | A_23_P167389   | NM_022481       | ARAP3        |
| 36 | A_23_P49448    | NM_024306       | FA2H         |
| 37 | A_23_P76749    | NM_020692       | GALNT16      |
| 38 | A_23_P98410    | NM_000073       | CD3G         |
| 39 | A_24_P296587   | NM_005220       | DLX3         |
| 40 | A_21_P0001070  | ENST00000445339 | LOC101927532 |
| 41 | A_23_P102000   | NM_001008540    | CXCR4        |
| 42 | A_23_P137931   | NM_000677       | ADORA3       |
| 43 | A_24_P212539   | NM_138801       | GALM         |
| 44 | A_24_P252945   | NM_032966       | CXCR5        |
| 45 | A_24_P280148   | NM_080817       | GPR82        |
| 46 | A_32_P351968   | NM_002118       | HLA-DMB      |
| 47 | A_21_P0003164  | lnc-KLF15-3:4   | lnc-KLF15-3  |
| 48 | A_22_P00003588 | ENST00000415019 |              |
| 49 | A_22_P00002818 | NR_126337       | LOC101927070 |
| 50 | A_23_P100711   | NM_000304       | PMP22        |
| 51 | A_24_P270728   | NM_001042483    | NUPR1        |



|    |                |                 |              |
|----|----------------|-----------------|--------------|
| 1  |                |                 |              |
| 2  | A_23_P38795    | NM_002029       | FPR1         |
| 3  | A_23_P8571     | NM_080744       | SSC4D        |
| 4  | A_24_P354689   | NM_004598       | SPOCK1       |
| 5  | A_33_P3323887  | ENST00000558436 | LOC102723481 |
| 6  | A_33_P3402091  | NM_006343       | MERTK        |
| 7  | A_23_P166087   | NM_014737       | RASSF2       |
| 8  | A_23_P169494   | NM_000607       | ORM1         |
| 9  | A_23_P42975    | NM_002736       | PRKAR2B      |
| 10 | A_24_P402588   | NM_018014       | BCL11A       |
| 11 | A_33_P3241984  | NM_015967       | PTPN22       |
| 12 | A_33_P3338733  | NM_198159       | MITF         |
| 13 | A_24_P188800   | NM_017923       | 37196        |
| 14 | A_33_P3240532  | NM_015149       | RGL1         |
| 15 | A_23_P426663   | NM_198159       | MITF         |
| 16 | A_23_P58132    | NM_004310       | RHOH         |
| 17 | A_24_P103469   | NM_007161       | LST1         |
| 18 | A_21_P0006860  | lnc-ZNF33A-4:1  | lnc-ZNF33A-4 |
| 19 | A_23_P129064   | NM_001482       | GATM         |
| 20 | A_23_P33723    | NM_004244       | CD163        |
| 21 | A_23_P67971    | NM_138801       | GALM         |
| 22 | A_23_P7144     | NM_001511       | CXCL1        |
| 23 | A_33_P3363637  | NM_013314       | BLNK         |
| 24 | A_33_P3691916  | NM_014883       | FAM13A       |
| 25 | A_21_P0002075  | NR_126337       | LOC101927070 |
| 26 | A_23_P217269   | NM_007268       | VSIG4        |
| 27 | A_23_P3014     | NM_005615       | RNASE6       |
| 28 | A_24_P274814   | NM_030984       | TBXAS1       |
| 29 | A_23_P34644    | NM_004001       | FCGR2B       |
| 30 | A_24_P334130   | NM_054034       | FN1          |
| 31 | A_23_P9485     | NM_000608       | ORM2         |
| 32 | A_33_P3395605  | NM_181724       | TMEM119      |
| 33 | A_23_P25566    | NM_004951       | GPR183       |
| 34 | A_23_P412562   | NM_174896       | C1orf162     |
| 35 | A_33_P3375368  | NM_001195381    | GPR35        |
| 36 | A_23_P13753    | NM_006163       | NFE2         |
| 37 | A_23_P214627   | NM_004847       | AIF1         |
| 38 | A_23_P143526   | NM_006272       | S100B        |
| 39 | A_22_P00013493 | ENST00000558436 | LOC102723481 |
| 40 | A_23_P387031   | NM_173465       | COL23A1      |
| 41 | A_23_P145114   | NM_001498       | GCLC         |
| 42 | A_23_P27306    | NM_130386       | COLEC12      |
| 43 | A_23_P142424   | NM_024660       | IGFLR1       |
| 44 | A_33_P3376971  | NM_024111       | CHAC1        |
| 45 | A_23_P206760   | NM_005143       | HP           |
| 46 | A_23_P104464   | NM_000698       | ALOX5        |
| 47 | A_24_P222655   | NM_015991       | C1QA         |
| 48 | A_33_P3242623  | NM_014331       | SLC7A11      |
| 49 | A_23_P12554    | NM_016112       | PKD2L1       |
| 50 | A_23_P420863   | NM_022162       | NOD2         |
| 51 | A_24_P153568   | NM_001039396    | MPEG1        |



|    |               |                    |                  |
|----|---------------|--------------------|------------------|
| 1  |               |                    |                  |
| 2  | A_33_P3361422 | NM_000784          | CYP27A1          |
| 3  | A_21_P0009596 | Inc-AC068473.1-1:1 | Inc-AC068473.1-1 |
| 4  | A_23_P145096  | NM_005084          | PLA2G7           |
| 5  | A_23_P120902  | NM_006498          | LGALS2           |
| 6  | A_23_P4536    | NM_012307          | EPB41L3          |
| 7  |               |                    |                  |
| 8  | A_33_P3358397 | NM_018176          | LGI2             |
| 9  | A_23_P216340  | NM_001045556       | SLA              |
| 10 | A_23_P259611  | NM_016616          | NME8             |
| 11 | A_33_P3390172 | NM_001145271       | ADAMDEC1         |
| 12 |               |                    |                  |
| 13 | A_33_P3284508 | NM_001174104       | CD14             |
| 14 | A_23_P146146  | NM_152565          | ATP6V0D2         |
| 15 | A_23_P23048   | NM_002965          | S100A9           |
| 16 | A_33_P3236868 | NM_005952          | MT1X             |
| 17 | A_23_P209625  | NM_000104          | CYP1B1           |
| 18 |               |                    |                  |
| 19 | A_33_P3290343 | NM_000104          | CYP1B1           |
| 20 | A_23_P21485   | NM_017933          | PID1             |
| 21 | A_33_P3385785 | NM_005621          | S100A12          |
| 22 | A_23_P66241   | NM_176870          | MT1M             |
| 23 | A_23_P74001   | NM_005621          | S100A12          |
| 24 |               |                    |                  |
| 25 | A_33_P3233645 | NM_001301267       | MT1G             |
| 26 | A_23_P434809  | NM_002964          | S100A8           |
| 27 |               |                    |                  |
| 28 |               |                    |                  |
| 29 |               |                    |                  |
| 30 |               |                    |                  |
| 31 |               |                    |                  |
| 32 |               |                    |                  |
| 33 |               |                    |                  |
| 34 |               |                    |                  |
| 35 |               |                    |                  |
| 36 |               |                    |                  |
| 37 |               |                    |                  |
| 38 |               |                    |                  |
| 39 |               |                    |                  |
| 40 |               |                    |                  |
| 41 |               |                    |                  |
| 42 |               |                    |                  |
| 43 |               |                    |                  |
| 44 |               |                    |                  |
| 45 |               |                    |                  |
| 46 |               |                    |                  |
| 47 |               |                    |                  |
| 48 |               |                    |                  |
| 49 |               |                    |                  |
| 50 |               |                    |                  |
| 51 |               |                    |                  |
| 52 |               |                    |                  |
| 53 |               |                    |                  |
| 54 |               |                    |                  |
| 55 |               |                    |                  |
| 56 |               |                    |                  |
| 57 |               |                    |                  |
| 58 |               |                    |                  |
| 59 |               |                    |                  |
| 60 |               |                    |                  |

| description                                                                           | adj. p value | log 2 FC |
|---------------------------------------------------------------------------------------|--------------|----------|
| matrix metallopeptidase 1                                                             | 0.000566     | -1.67    |
| cell migration inducing protein, hyaluronan binding                                   | 0.000256     | -1.26    |
| aryl-hydrocarbon receptor nuclear translocator 2                                      | 0.00062      | -1.24    |
| tachykinin 4 (hemokinin)                                                              | 0.000566     | -1.16    |
| NA                                                                                    | 0.000566     | -1.07    |
| DIRAS family, GTP-binding RAS-like 2                                                  | 0.002497     | -1.06    |
| neurotensin                                                                           | 0.007199     | -1.05    |
| early growth response 1                                                               | 0.013778     | -0.99    |
| high mobility group AT-hook 2                                                         | 0.000205     | -0.99    |
| hes-related family bHLH transcription factor with YRPW motif 2                        | 0.00458      | -0.99    |
| G protein-coupled receptor 88                                                         | 0.002102     | -0.94    |
| podocalyxin-like                                                                      | 0.000566     | -0.92    |
| interleukin 7 receptor                                                                | 0.016372     | -0.92    |
| nebulin-related anchoring protein                                                     | 0.006199     | -0.91    |
| limb bud and heart development                                                        | 0.001564     | -0.9     |
| regulator of G-protein signaling 16                                                   | 0.012879     | -0.89    |
| oxytocin receptor                                                                     | 0.001894     | -0.88    |
| serpin peptidase inhibitor, clade E (nexin, plasminogen activator inhibitor 1) type 1 | 0.009561     | -0.87    |
| regulator of G-protein signaling 2                                                    | 0.000458     | -0.86    |
| bone morphogenetic protein 4                                                          | 0.000566     | -0.83    |
| matrix Gla protein                                                                    | 0.007638     | -0.83    |
| matrix Gla protein                                                                    | 0.00508      | -0.81    |
| polo-like kinase 2                                                                    | 0.022276     | -0.81    |
| dysferlin                                                                             | 0.000458     | -0.81    |
| myoglobin                                                                             | 0.000991     | -0.81    |
| ADAM metallopeptidase with thrombospondin type 1 motif, 4                             | 0.010658     | -0.8     |
| prepronociceptin                                                                      | 0.018663     | -0.78    |
| GRB2 associated, regulator of MAPK1                                                   | 0.001251     | -0.78    |
| regulator of G-protein signaling 1                                                    | 0.001057     | -0.77    |
| PAX8 antisense RNA 1                                                                  | 0.000327     | -0.76    |
| nestin                                                                                | 0.002003     | -0.74    |
| growth differentiation factor 15                                                      | 0.024916     | -0.73    |
| LON peptidase N-terminal domain and ring finger 2                                     | 0.001564     | -0.73    |
| S100 calcium binding protein A16                                                      | 0.006025     | -0.71    |
| HOP homeobox                                                                          | 0.019833     | -0.71    |
| early growth response 2                                                               | 0.001084     | -0.71    |
| MAP3K7 C-terminal like                                                                | 0.030269     | -0.71    |
| collagen, type XI, alpha 2                                                            | 0.000327     | -0.71    |
| interleukin 2 receptor, gamma                                                         | 0.000778     | -0.71    |
| protein tyrosine phosphatase type IVA, member 3                                       | 0.00443      | -0.7     |
| NA                                                                                    | 0.000428     | -0.69    |
| lysyl oxidase-like 4                                                                  | 0.003741     | -0.69    |
| collagen, type IV, alpha 2                                                            | 0.000327     | -0.67    |
| killer cell lectin-like receptor subfamily C, member 1                                | 0.032994     | -0.66    |
| tripartite motif containing 2                                                         | 0.002462     | -0.66    |
| nestin                                                                                | 0.004969     | -0.66    |
| neuronal regeneration related protein                                                 | 0.0175       | -0.66    |

|    |                                                                          |          |       |
|----|--------------------------------------------------------------------------|----------|-------|
| 1  |                                                                          |          |       |
| 2  | F-box protein 38                                                         | 0.011748 | -0.65 |
| 3  | MX dynamin-like GTPase 1                                                 | 0.006199 | -0.65 |
| 4  | MAM domain containing glycosylphosphatidylinositol anchor 1              | 0.005376 | -0.65 |
| 5  | nerve growth factor receptor                                             | 0.013643 | -0.65 |
| 6  | platelet-derived growth factor alpha polypeptide                         | 0.023664 | -0.64 |
| 7  | inhibin, beta A                                                          | 0.002735 | -0.63 |
| 8  | transmembrane protein 132A                                               | 0.003289 | -0.63 |
| 9  | epoxide hydrolase 4                                                      | 0.003919 | -0.63 |
| 10 | gliomedin                                                                | 0.000566 | -0.63 |
| 11 | thrombospondin 2                                                         | 0.02416  | -0.63 |
| 12 | sortilin-related VPS10 domain containing receptor 2                      | 0.01241  | -0.62 |
| 13 | dual specificity phosphatase 5                                           | 0.000779 | -0.62 |
| 14 | homer scaffolding protein 2                                              | 0.011137 | -0.62 |
| 15 | transmembrane and tetratricopeptide repeat containing 1                  | 0.00062  | -0.62 |
| 16 | tubulin, alpha 3c                                                        | 0.000991 | -0.61 |
| 17 | cyclin D1                                                                | 0.045088 | -0.61 |
| 18 | coagulation factor II (thrombin) receptor                                | 0.013784 | -0.61 |
| 19 | human immunodeficiency virus type I enhancer binding protein 3           | 0.024916 | -0.61 |
| 20 | chromosome 8 open reading frame 60                                       | 0.013787 | -0.61 |
| 21 | bridging integrator 1                                                    | 0.014392 | -0.6  |
| 22 | oxysterol binding protein-like 3                                         | 0.000779 | -0.6  |
| 23 | epithelial membrane protein 1                                            | 0.002344 | -0.6  |
| 24 | cholesterol 25-hydroxylase                                               | 0.005299 | -0.6  |
| 25 | caveolin 1, caveolae protein, 22kDa                                      | 0.027121 | -0.6  |
| 26 | EFR3 homolog B                                                           | 0.010339 | -0.6  |
| 27 | NA                                                                       | 0.000612 | -0.59 |
| 28 | protein tyrosine phosphatase type IVA, member 3                          | 0.007406 | -0.59 |
| 29 | four jointed box 1                                                       | 0.011677 | -0.59 |
| 30 | transmembrane 4 L six family member 19                                   | 0.009045 | -0.59 |
| 31 | glypican 4                                                               | 0.006129 | -0.59 |
| 32 | KN motif and ankyrin repeat domains 1                                    | 0.005739 | -0.59 |
| 33 | guanine nucleotide binding protein (G protein), alpha inhibiting activit | 0.015315 | -0.58 |
| 34 | butyrobetaine (gamma), 2-oxoglutarate dioxygenase (gamma-butyrob         | 0.037646 | -0.58 |
| 35 | ArfGAP with RhoGAP domain, ankyrin repeat and PH domain 3                | 0.008431 | -0.58 |
| 36 | fatty acid 2-hydroxylase                                                 | 0.001969 | -0.58 |
| 37 | polypeptide N-acetylgalactosaminyltransferase 16                         | 0.00508  | -0.58 |
| 38 | CD3g molecule, gamma (CD3-TCR complex)                                   | 0.023483 | -0.58 |
| 39 | distal-less homeobox 3                                                   | 0.003289 | -0.58 |
| 40 | NA                                                                       | 0.005094 | 0.58  |
| 41 | chemokine (C-X-C motif) receptor 4                                       | 0.018274 | 0.58  |
| 42 | adenosine A3 receptor                                                    | 0.01318  | 0.58  |
| 43 | galactose mutarotase (aldose 1-epimerase)                                | 0.029912 | 0.58  |
| 44 | chemokine (C-X-C motif) receptor 5                                       | 0.029738 | 0.58  |
| 45 | G protein-coupled receptor 82                                            | 0.008297 | 0.58  |
| 46 | major histocompatibility complex, class II, DM beta                      | 0.003443 | 0.58  |
| 47 | NA                                                                       | 0.010339 | 0.59  |
| 48 | NA                                                                       | 0.035202 | 0.59  |
| 49 | NA                                                                       | 0.015731 | 0.6   |
| 50 | peripheral myelin protein 22                                             | 0.010658 | 0.6   |
| 51 | nuclear protein, transcriptional regulator, 1                            | 0.023847 | 0.6   |

|    |                                                                           |          |      |
|----|---------------------------------------------------------------------------|----------|------|
| 1  |                                                                           |          |      |
| 2  | formyl peptide receptor 1                                                 | 0.028907 | 0.61 |
| 3  | scavenger receptor cysteine rich family, 4 domains                        | 0.000566 | 0.62 |
| 4  | sparc/osteonectin, cwcv and kazal-like domains proteoglycan (testicular)  | 0.010282 | 0.62 |
| 5  | NA                                                                        | 0.001268 | 0.62 |
| 6  | MER proto-oncogene, tyrosine kinase                                       | 0.009573 | 0.62 |
| 7  | Ras association (RalGDS/AF-6) domain family member 2                      | 0.011132 | 0.63 |
| 8  | orosomucoid 1                                                             | 0.003468 | 0.63 |
| 9  | protein kinase, cAMP-dependent, regulatory, type II, beta                 | 0.002003 | 0.63 |
| 10 | B-cell CLL/lymphoma 11A (zinc finger protein)                             | 0.000612 | 0.64 |
| 11 | protein tyrosine phosphatase, non-receptor type 22 (lymphoid)             | 0.006212 | 0.64 |
| 12 | microphthalmia-associated transcription factor                            | 0.005984 | 0.64 |
| 13 | membrane-associated ring finger (C3HC4) 1, E3 ubiquitin protein ligase    | 0.002003 | 0.65 |
| 14 | ral guanine nucleotide dissociation stimulator-like 1                     | 0.020855 | 0.65 |
| 15 | microphthalmia-associated transcription factor                            | 0.009186 | 0.66 |
| 16 | ras homolog family member H                                               | 0.000859 | 0.66 |
| 17 | leukocyte specific transcript 1                                           | 0.023805 | 0.66 |
| 18 | NA                                                                        | 0.002432 | 0.67 |
| 19 | glycine amidinotransferase (L-arginine:glycine amidinotransferase)        | 0.006212 | 0.67 |
| 20 | CD163 molecule                                                            | 0.005438 | 0.68 |
| 21 | galactose mutarotase (aldose 1-epimerase)                                 | 0.041464 | 0.68 |
| 22 | chemokine (C-X-C motif) ligand 1 (melanoma growth stimulating activity)   | 0.033505 | 0.68 |
| 23 | B-cell linker                                                             | 0.003664 | 0.68 |
| 24 | family with sequence similarity 13, member A                              | 0.024916 | 0.68 |
| 25 | NA                                                                        | 0.001043 | 0.69 |
| 26 | V-set and immunoglobulin domain containing 4                              | 0.004567 | 0.69 |
| 27 | ribonuclease, RNase A family, k6                                          | 0.00089  | 0.69 |
| 28 | thromboxane A synthase 1 (platelet)                                       | 0.03093  | 0.69 |
| 29 | Fc fragment of IgG, low affinity IIb, receptor (CD32)                     | 0.041464 | 0.7  |
| 30 | fibronectin 1                                                             | 0.022664 | 0.7  |
| 31 | orosomucoid 2                                                             | 0.000188 | 0.71 |
| 32 | transmembrane protein 119                                                 | 0.026773 | 0.71 |
| 33 | G protein-coupled receptor 183                                            | 0.000566 | 0.72 |
| 34 | chromosome 1 open reading frame 162                                       | 0.01397  | 0.72 |
| 35 | G protein-coupled receptor 35                                             | 0.003298 | 0.72 |
| 36 | nuclear factor, erythroid 2                                               | 0.00508  | 0.73 |
| 37 | allograft inflammatory factor 1                                           | 0.000764 | 0.73 |
| 38 | S100 calcium binding protein B                                            | 0.002344 | 0.75 |
| 39 | NA                                                                        | 0.000508 | 0.76 |
| 40 | collagen, type XXIII, alpha 1                                             | 0.010339 | 0.76 |
| 41 | glutamate-cysteine ligase, catalytic subunit                              | 0.01397  | 0.77 |
| 42 | collectin sub-family member 12                                            | 0.009186 | 0.77 |
| 43 | IGF-like family receptor 1                                                | 0.001969 | 0.78 |
| 44 | ChaC glutathione-specific gamma-glutamylcyclotransferase 1                | 0.015002 | 0.78 |
| 45 | haptoglobin                                                               | 0.007672 | 0.79 |
| 46 | arachidonate 5-lipoxygenase                                               | 0.002344 | 0.82 |
| 47 | complement component 1, q subcomponent, A chain                           | 0.035079 | 0.82 |
| 48 | solute carrier family 7 (anionic amino acid transporter light chain, xc-) | 0.002344 | 0.82 |
| 49 | polycystic kidney disease 2-like 1                                        | 0.002344 | 0.84 |
| 50 | nucleotide-binding oligomerization domain containing 2                    | 0.001268 | 0.84 |
| 51 | macrophage expressed 1                                                    | 0.003443 | 0.85 |

|    |                                                                         |          |      |
|----|-------------------------------------------------------------------------|----------|------|
| 1  |                                                                         |          |      |
| 2  | cytochrome P450, family 27, subfamily A, polypeptide 1                  | 0.002179 | 0.86 |
| 3  | NA                                                                      | 0.002735 | 0.88 |
| 4  | phospholipase A2, group VII (platelet-activating factor acetylhydrolase | 0.032337 | 0.88 |
| 5  | lectin, galactoside-binding, soluble, 2                                 | 0.00508  | 0.92 |
| 6  | erythrocyte membrane protein band 4.1-like 3                            | 0.011637 | 0.94 |
| 7  | leucine-rich repeat LGI family, member 2                                | 0.005061 | 0.99 |
| 8  | Src-like-adaptor                                                        | 0.003811 | 1    |
| 9  | NME/NM23 family member 8                                                | 0.001043 | 1.02 |
| 10 | ADAM-like, decysin 1                                                    | 0.002102 | 1.15 |
| 11 | CD14 molecule                                                           | 0.001894 | 1.16 |
| 12 | ATPase, H+ transporting, lysosomal 38kDa, V0 subunit d2                 | 0.000256 | 1.18 |
| 13 | S100 calcium binding protein A9                                         | 0.000428 | 1.18 |
| 14 | metallothionein 1X                                                      | 0.00508  | 1.29 |
| 15 | cytochrome P450, family 1, subfamily B, polypeptide 1                   | 0.001268 | 1.36 |
| 16 | cytochrome P450, family 1, subfamily B, polypeptide 1                   | 0.002344 | 1.37 |
| 17 | phosphotyrosine interaction domain containing 1                         | 0.000991 | 1.46 |
| 18 | S100 calcium binding protein A12                                        | 0.000188 | 1.56 |
| 19 | metallothionein 1M                                                      | 0.000205 | 1.86 |
| 20 | S100 calcium binding protein A12                                        | 0.000188 | 1.97 |
| 21 | metallothionein 1G                                                      | 0.032743 | 2.3  |
| 22 | S100 calcium binding protein A8                                         | 0.000023 | 2.59 |
| 23 |                                                                         |          |      |
| 24 |                                                                         |          |      |
| 25 |                                                                         |          |      |
| 26 |                                                                         |          |      |
| 27 |                                                                         |          |      |
| 28 |                                                                         |          |      |
| 29 |                                                                         |          |      |
| 30 |                                                                         |          |      |
| 31 |                                                                         |          |      |
| 32 |                                                                         |          |      |
| 33 |                                                                         |          |      |
| 34 |                                                                         |          |      |
| 35 |                                                                         |          |      |
| 36 |                                                                         |          |      |
| 37 |                                                                         |          |      |
| 38 |                                                                         |          |      |
| 39 |                                                                         |          |      |
| 40 |                                                                         |          |      |
| 41 |                                                                         |          |      |
| 42 |                                                                         |          |      |
| 43 |                                                                         |          |      |
| 44 |                                                                         |          |      |
| 45 |                                                                         |          |      |
| 46 |                                                                         |          |      |
| 47 |                                                                         |          |      |
| 48 |                                                                         |          |      |
| 49 |                                                                         |          |      |
| 50 |                                                                         |          |      |
| 51 |                                                                         |          |      |
| 52 |                                                                         |          |      |
| 53 |                                                                         |          |      |
| 54 |                                                                         |          |      |
| 55 |                                                                         |          |      |
| 56 |                                                                         |          |      |
| 57 |                                                                         |          |      |
| 58 |                                                                         |          |      |
| 59 |                                                                         |          |      |
| 60 |                                                                         |          |      |

**Exposure: 24h Zinc oxide nanoparticles (20 nm**

| Probe ID       | TargetID        | GeneSymbol    |
|----------------|-----------------|---------------|
| A_19_P00320067 | NR_026874       | LOC100130417  |
| A_23_P119778   | NM_020342       | SLC39A10      |
| A_33_P3333232  | ENST00000621947 | CCDC162P      |
| A_23_P36882    | NM_006183       | NTS           |
| A_24_P49199    | NM_181789       | GLDN          |
| A_23_P360754   | NM_005099       | ADAMTS4       |
| A_33_P3258046  | NM_170685       | TAC4          |
| A_23_P167096   | NM_005429       | VEGFC         |
| A_23_P52761    | NM_002423       | MMP7          |
| A_23_P92730    | NM_006308       | HSPB3         |
| A_23_P218442   | NM_002483       | CEACAM6       |
| A_33_P3380457  | NM_022049       | GPR88         |
| A_23_P54144    | NM_001202       | BMP4          |
| A_23_P204286   | NM_000900       | MGP           |
| A_23_P150316   | NM_002426       | MMP12         |
| A_33_P3402474  | NM_001031722    | ATAT1         |
| A_23_P257003   | NM_006200       | PCSK5         |
| A_23_P344421   | NM_019055       | ROBO4         |
| A_33_P3371989  | NM_205833       | IGSF1         |
| A_23_P379789   | NM_013305       | ST8SIA5       |
| A_22_P00000184 | lnc-ABHD16B-1:1 | lnc-ABHD16B-1 |
| A_22_P00009165 | NR_046696       | IPO9-AS1      |
| A_23_P134085   | NM_173515       | CNKSR3        |
| A_21_P0014129  | NR_047568       | LINC00578     |
| A_23_P202448   | NM_199168       | CXCL12        |
| A_33_P3316878  | NM_024536       | CHPF          |
| A_23_P207564   | NM_001291470    | CCL4L2        |
| A_23_P259692   | NM_058179       | PSAT1         |
| A_22_P00010760 | ENST00000563424 |               |
| A_33_P3396527  | NM_006467       | POLR3G        |
| A_21_P0001923  | ENST00000450667 |               |
| A_23_P319583   | NM_014747       | RIMS3         |
| A_23_P40657    | NM_014291       | GCAT          |
| A_22_P00006819 | NR_038852       | LINC00929     |
| A_23_P34142    | NM_016303       | WBP5          |
| A_22_P00014843 | ENST00000550684 |               |
| A_24_P238131   | NM_015551       | SUSD5         |
| A_33_P3216869  | NM_004378       | CRABP1        |
| A_33_P3342628  | NM_021170       | HES4          |
| A_23_P101992   | NM_006770       | MARCO         |
| A_33_P3265301  | NM_152219       | GJD3          |
| A_21_P0014368  | ENST00000596510 | PLA2G4C       |
| A_33_P3326483  | NM_004378       | CRABP1        |
| A_23_P86470    | NM_003956       | CH25H         |
| A_33_P3590259  | NM_004887       | CXCL14        |
| A_23_P64372    | NM_001062       | TCN1          |
| A_33_P3291454  | NM_198515       | CCDC172       |

|    |                |                 |               |
|----|----------------|-----------------|---------------|
| 1  |                |                 |               |
| 2  | A_23_P365738   | NM_015193       | ARC           |
| 3  | A_32_P171061   | NM_005170       | ASCL2         |
| 4  | A_23_P23815    | NM_021194       | SLC30A1       |
| 5  | A_24_P156748   | NM_001004434    | SLC30A2       |
| 6  | A_23_P420942   | XM_005255956    | MT1E          |
| 7  | A_23_P215913   | NM_001831       | CLU           |
| 8  | A_23_P422831   | NM_004816       | FAM189A2      |
| 9  | A_21_P0009476  | lnc-KATNAL2-4:1 | lnc-KATNAL2-4 |
| 10 | A_32_P135336   | NR_002556       | LOC388242     |
| 11 | A_33_P3367301  | NM_152219       | GJD3          |
| 12 | A_23_P106844   | NM_005953       | MT2A          |
| 13 | A_23_P114903   | NM_002155       | HSPA6         |
| 14 | A_23_P54840    | NM_005946       | MT1A          |
| 15 | A_22_P00010235 | NM_005947       | MT1B          |
| 16 | A_23_P37983    | NM_005947       | MT1B          |
| 17 | A_23_P427703   | NR_001447       | MT1L          |
| 18 | A_33_P3231156  | ENST00000567054 |               |
| 19 | A_33_P3315314  | NM_001276687    | MT1HL1        |
| 20 | A_23_P206724   | NM_175617       | MT1E          |
| 21 | A_21_P0000671  | NM_175617       | MT1E          |
| 22 | A_33_P3368313  | NM_005951       | MT1H          |
| 23 | A_23_P15174    | NM_005949       | MT1F          |
| 24 | A_33_P3236868  | NM_005952       | MT1X          |
| 25 | A_23_P66241    | NM_176870       | MT1M          |
| 26 | A_33_P3233645  | NM_001301267    | MT1G          |
| 27 |                |                 |               |
| 28 |                |                 |               |
| 29 |                |                 |               |
| 30 |                |                 |               |
| 31 |                |                 |               |
| 32 |                |                 |               |
| 33 |                |                 |               |
| 34 |                |                 |               |
| 35 |                |                 |               |
| 36 |                |                 |               |
| 37 |                |                 |               |
| 38 |                |                 |               |
| 39 |                |                 |               |
| 40 |                |                 |               |
| 41 |                |                 |               |
| 42 |                |                 |               |
| 43 |                |                 |               |
| 44 |                |                 |               |
| 45 |                |                 |               |
| 46 |                |                 |               |
| 47 |                |                 |               |
| 48 |                |                 |               |
| 49 |                |                 |               |
| 50 |                |                 |               |
| 51 |                |                 |               |
| 52 |                |                 |               |
| 53 |                |                 |               |
| 54 |                |                 |               |
| 55 |                |                 |               |
| 56 |                |                 |               |
| 57 |                |                 |               |
| 58 |                |                 |               |
| 59 |                |                 |               |
| 60 |                |                 |               |

n)

| description                                                              | adj. p value | log 2 FC |
|--------------------------------------------------------------------------|--------------|----------|
| uncharacterized LOC100130417                                             | 0.036166     | -0.47    |
| solute carrier family 39 (zinc transporter), member 10                   | 0.000027     | -1.44    |
| NA                                                                       | 0.002041     | -0.93    |
| neurotensin                                                              | 0.039818     | -0.9     |
| gliomedin                                                                | 0.000001     | -0.83    |
| ADAM metalloproteinase with thrombospondin type 1 motif, 4               | 0.017826     | -0.79    |
| tachykinin 4 (hemokinin)                                                 | 0.036018     | -0.77    |
| vascular endothelial growth factor C                                     | 0.002958     | -0.76    |
| matrix metalloproteinase 7                                               | 0            | -0.72    |
| heat shock 27kDa protein 3                                               | 0.000007     | -0.71    |
| carcinoembryonic antigen-related cell adhesion molecule 6 (non-specific) | 0.000004     | -0.69    |
| G protein-coupled receptor 88                                            | 0.043316     | -0.69    |
| bone morphogenetic protein 4                                             | 0.005141     | -0.67    |
| matrix Gla protein                                                       | 0.044598     | -0.65    |
| matrix metalloproteinase 12                                              | 0.003182     | -0.63    |
| alpha tubulin acetyltransferase 1                                        | 0.002041     | -0.63    |
| proprotein convertase subtilisin/kexin type 5                            | 0.03064      | -0.62    |
| roundabout guidance receptor 4                                           | 0.003925     | -0.62    |
| immunoglobulin superfamily, member 1                                     | 0.000389     | -0.6     |
| ST8 alpha-N-acetyl-neuraminidase alpha-2,8-sialyltransferase 5           | 0.000051     | -0.59    |
| NA                                                                       | 0.002633     | 0.59     |
| NA                                                                       | 0.000391     | 0.6      |
| CNKSR family member 3                                                    | 0.000523     | 0.6      |
| NA                                                                       | 0.000003     | 0.61     |
| chemokine (C-X-C motif) ligand 12                                        | 0.000003     | 0.61     |
| chondroitin polymerizing factor                                          | 0.000702     | 0.61     |
| chemokine (C-C motif) ligand 4                                           | 0.033006     | 0.63     |
| phosphoserine aminotransferase 1                                         | 0.017993     | 0.64     |
| NA                                                                       | 0.002877     | 0.65     |
| polymerase (RNA) III (DNA directed) polypeptide G (32kD)                 | 0.00001      | 0.65     |
| NA                                                                       | 0.044598     | 0.66     |
| regulating synaptic membrane exocytosis 3                                | 0.000702     | 0.67     |
| glycine C-acetyltransferase                                              | 0.000145     | 0.68     |
| NA                                                                       | 0.000003     | 0.69     |
| WW domain binding protein 5                                              | 0.00001      | 0.7      |
| NA                                                                       | 0.002877     | 0.71     |
| sushi domain containing 5                                                | 0.000004     | 0.71     |
| cellular retinoic acid binding protein 1                                 | 0            | 0.71     |
| hes family bHLH transcription factor 4                                   | 0.002782     | 0.73     |
| macrophage receptor with collagenous structure                           | 0.000002     | 0.74     |
| gap junction protein, delta 3, 31.9kDa                                   | 0.000063     | 0.75     |
| NA                                                                       | 0.001652     | 0.78     |
| cellular retinoic acid binding protein 1                                 | 0            | 0.78     |
| cholesterol 25-hydroxylase                                               | 0.000086     | 0.81     |
| chemokine (C-X-C motif) ligand 14                                        | 0.000025     | 0.91     |
| transcobalamin I (vitamin B12 binding protein, R binder family)          | 0            | 1        |
| coiled-coil domain containing 172                                        | 0.000574     | 1.01     |



|    |                                                       |          |      |
|----|-------------------------------------------------------|----------|------|
| 1  |                                                       |          |      |
| 2  | activity-regulated cytoskeleton-associated protein    | 0.039746 | 1.06 |
| 3  | achaete-scute family bHLH transcription factor 2      | 0        | 1.09 |
| 4  | solute carrier family 30 (zinc transporter), member 1 | 0        | 1.18 |
| 5  | solute carrier family 30 (zinc transporter), member 2 | 0        | 1.35 |
| 6  | metallothionein 1E                                    | 0        | 1.37 |
| 7  | clusterin                                             | 0        | 1.4  |
| 8  | family with sequence similarity 189, member A2        | 0        | 1.43 |
| 9  | NA                                                    | 0        | 1.5  |
| 10 | SAGA complex associated factor 29 pseudogene          | 0        | 1.52 |
| 11 | gap junction protein, delta 3, 31.9kDa                | 0        | 1.8  |
| 12 | metallothionein 2A                                    | 0.03736  | 2.25 |
| 13 | heat shock 70kDa protein 6 (HSP70B)                   | 0.003204 | 2.35 |
| 14 | metallothionein 1A                                    | 0        | 3.04 |
| 15 | NA                                                    | 0        | 3.36 |
| 16 | metallothionein 1B                                    | 0        | 3.43 |
| 17 | metallothionein 1L (gene/pseudogene)                  | 0        | 3.47 |
| 18 | NA                                                    | 0.000025 | 3.5  |
| 19 | metallothionein 1H                                    | 0        | 3.54 |
| 20 | metallothionein 1E                                    | 0        | 3.81 |
| 21 | NA                                                    | 0        | 3.87 |
| 22 | metallothionein 1H                                    | 0        | 3.98 |
| 23 | metallothionein 1F                                    | 0        | 4.05 |
| 24 | metallothionein 1X                                    | 0        | 4.38 |
| 25 | metallothionein 1M                                    | 0        | 4.88 |
| 26 | metallothionein 1G                                    | 0        | 5.69 |
| 27 |                                                       |          |      |
| 28 |                                                       |          |      |
| 29 |                                                       |          |      |
| 30 |                                                       |          |      |
| 31 |                                                       |          |      |
| 32 |                                                       |          |      |
| 33 |                                                       |          |      |
| 34 |                                                       |          |      |
| 35 |                                                       |          |      |
| 36 |                                                       |          |      |
| 37 |                                                       |          |      |
| 38 |                                                       |          |      |
| 39 |                                                       |          |      |
| 40 |                                                       |          |      |
| 41 |                                                       |          |      |
| 42 |                                                       |          |      |
| 43 |                                                       |          |      |
| 44 |                                                       |          |      |
| 45 |                                                       |          |      |
| 46 |                                                       |          |      |
| 47 |                                                       |          |      |
| 48 |                                                       |          |      |
| 49 |                                                       |          |      |
| 50 |                                                       |          |      |
| 51 |                                                       |          |      |
| 52 |                                                       |          |      |
| 53 |                                                       |          |      |
| 54 |                                                       |          |      |
| 55 |                                                       |          |      |
| 56 |                                                       |          |      |
| 57 |                                                       |          |      |
| 58 |                                                       |          |      |
| 59 |                                                       |          |      |
| 60 |                                                       |          |      |

**Exposure: 24h Zinc oxide particles (300 nm)**

| Probe ID       | TargetID        | GeneSymbol |
|----------------|-----------------|------------|
| A_23_P119778   | NM_020342       | SLC39A10   |
| A_33_P3252048  | NM_001007533    | PPP1R27    |
| A_33_P3361636  | NM_001190839    | MGP        |
| A_23_P204286   | NM_000900       | MGP        |
| A_23_P36882    | NM_006183       | NTS        |
| A_33_P3333232  | ENST00000621947 | CCDC162P   |
| A_22_P00008494 | NR_002798       | NAPSB      |
| A_33_P3380457  | NM_022049       | GPR88      |
| A_23_P253321   | NM_006228       | PNOC       |
| A_23_P1691     | NM_002421       | MMP1       |
| A_33_P3287472  | NM_001007533    | PPP1R27    |
| A_23_P360754   | NM_005099       | ADAMTS4    |
| A_23_P140384   | NM_001911       | CTSG       |
| A_23_P218442   | NM_002483       | CEACAM6    |
| A_23_P56559    | NM_001142270    | DHRS9      |
| A_23_P254863   | NM_153361       | NIM1K      |
| A_23_P36120    | NM_022349       | MS4A6A     |
| A_23_P54144    | NM_001202       | BMP4       |
| A_22_P00008493 | NR_002798       | NAPSB      |
| A_23_P150316   | NM_002426       | MMP12      |
| A_33_P3229918  | NM_001243168    | PTCRA      |
| A_33_P3371989  | NM_205833       | IGSF1      |
| A_24_P363408   | NM_012259       | HEY2       |
| A_23_P142345   | NM_002777       | PRTN3      |
| A_23_P344421   | NM_019055       | ROBO4      |
| A_23_P408285   | NM_153026       | PRICKLE1   |
| A_33_P3258046  | NM_170685       | TAC4       |
| A_23_P212608   | NM_022131       | CLSTN2     |
| A_23_P24616    | NM_170601       | SIAE       |
| A_23_P257003   | NM_006200       | PCSK5      |
| A_23_P402765   | NM_198060       | NRAP       |
| A_24_P49199    | NM_181789       | GLDN       |
| A_23_P110851   | NM_198253       | TERT       |
| A_23_P130961   | NM_001972       | ELANE      |
| A_23_P167096   | NM_005429       | VEGFC      |
| A_23_P256107   | NM_006665       | HPSE       |
| A_32_P86739    | NM_001010911    | CASC10     |
| A_22_P00004867 | ENST00000523769 |            |
| A_23_P151046   | NM_002259       | KLRC1      |
| A_23_P301521   | NM_020848       | KIAA1462   |
| A_33_P3229953  | NM_001958       | EEF1A2     |
| A_22_P00004214 | ENST00000458420 | CLSTN2     |
| A_23_P379789   | NM_013305       | ST8SIA5    |
| A_33_P3480395  | ENST00000360835 | SCUBE1     |
| A_24_P406754   | NM_032211       | LOXL4      |
| A_33_P3209960  | NM_153819       | RASGRP2    |
| A_21_P0014223  | XR_113143       |            |

|    |                |               |              |
|----|----------------|---------------|--------------|
| 1  |                |               |              |
| 2  | A_23_P127495   | NM_003986     | BBOX1        |
| 3  | A_23_P212354   | NM_001123041  | CCR2         |
| 4  | A_23_P22444    | NM_002621     | CFP          |
| 5  | A_24_P391586   | NM_178507     | OAF          |
| 6  | A_23_P163697   | NM_016524     | SYT17        |
| 7  | A_23_P52761    | NM_002423     | MMP7         |
| 8  | A_24_P766716   | NM_001142343  | CMKLR1       |
| 9  | A_33_P3293446  | NM_020848     | KIAA1462     |
| 10 | A_33_P3236020  | NM_138379     | TIMD4        |
| 11 | A_21_P0009034  | NR_126340     | LOC100996338 |
| 12 | A_22_P00019635 | lnc-CIB3-1:1  | lnc-CIB3-1   |
| 13 | A_32_P112592   | NR_026989     | LINC01140    |
| 14 | A_33_P3402474  | NM_001031722  | ATAT1        |
| 15 | A_23_P121926   | NM_005410     | SEPP1        |
| 16 | A_23_P426021   | NM_015187     | SEL1L3       |
| 17 | A_23_P64058    | NM_153819     | RASGRP2      |
| 18 | A_23_P138541   | NM_003739     | AKR1C3       |
| 19 | A_23_P161507   | NM_004923     | MTL5         |
| 20 | A_23_P330561   | NM_174918     | MCEMP1       |
| 21 | A_24_P190472   | NM_003064     | SLPI         |
| 22 | A_32_P76853    | NM_001282484  | GOLGA8R      |
| 23 | A_19_P00320067 | NR_026874     | LOC100130417 |
| 24 | A_22_P00007941 | NR_125986     | LOC101929592 |
| 25 | A_23_P121716   | NM_005139     | ANXA3        |
| 26 | A_23_P48596    | NM_198232     | RNASE1       |
| 27 | A_23_P67569    | NM_024888     | LPPR3        |
| 28 | A_23_P203376   | NM_152852     | MS4A6A       |
| 29 | A_24_P133905   | NM_005064     | CCL23        |
| 30 | A_33_P3209962  | NM_153819     | RASGRP2      |
| 31 | A_33_P3413741  | NM_000916     | OXTR         |
| 32 | A_23_P8981     | NM_000349     | STAR         |
| 33 | A_24_P299318   | NM_182705     | FAM101B      |
| 34 | A_33_P3216442  | NM_080680     | COL11A2      |
| 35 | A_33_P3403053  | lnc-GUSB-5:1  | lnc-GUSB-5   |
| 36 | A_22_P00023104 | lnc-RREB1-1:1 | lnc-RREB1-1  |
| 37 | A_23_P125303   | NM_001555     | IGSF1        |
| 38 | A_23_P23194    | NM_032409     | PINK1        |
| 39 | A_23_P257971   | NM_001353     | AKR1C1       |
| 40 | A_33_P3282390  | NM_000841     | GRM4         |
| 41 | A_22_P00009067 | NR_046873     | TPRG1-AS1    |
| 42 | A_23_P42322    | NM_080680     | COL11A2      |
| 43 | A_24_P379820   | NM_030926     | ITM2C        |
| 44 | A_23_P2543     | NM_015267     | CUX2         |
| 45 | A_23_P96501    | NM_001003811  | TEX11        |
| 46 | A_33_P3267799  | NM_001278426  | LILRB4       |
| 47 | A_33_P3390868  | NM_133477     | SYNPO2       |
| 48 | A_33_P3391796  | NM_005450     | NOG          |
| 49 | A_23_P102000   | NM_001008540  | CXCR4        |
| 50 | A_23_P19517    | NM_002224     | ITPR3        |
| 51 | A_23_P86470    | NM_003956     | CH25H        |

|    |                |                 |               |
|----|----------------|-----------------|---------------|
| 1  |                |                 |               |
| 2  | A_23_P259692   | NM_058179       | PSAT1         |
| 3  | A_23_P42718    | NM_004289       | NFE2L3        |
| 4  | A_23_P52207    | NM_012342       | BAMBI         |
| 5  | A_33_P3414912  | NM_001200056    | NPL           |
| 6  | A_33_P3593774  | NM_001303429    | PIK3R3        |
| 7  | A_33_P3781228  | NR_125739       | CEBPB-AS1     |
| 8  | A_22_P00011370 | ENST00000328963 | P2RX7         |
| 9  | A_23_P371266   | NM_015569       | DNM3          |
| 10 | A_23_P55706    | NM_006509       | RELB          |
| 11 | A_21_P0004750  | lnc-SUPT3H-1:5  | lnc-SUPT3H-1  |
| 12 | A_22_P00018349 | ENST00000570843 |               |
| 13 | A_23_P391228   | NM_001031740    | MANEAL        |
| 14 | A_32_P71788    | NM_002014       | FKBP4         |
| 15 | A_33_P3242623  | NM_014331       | SLC7A11       |
| 16 | A_23_P18641    | NM_031953       | SNX25         |
| 17 | A_23_P343398   | NM_001838       | CCR7          |
| 18 | A_23_P44724    | NM_001321       | CSRP2         |
| 19 | A_32_P32254    | NM_001848       | COL6A1        |
| 20 | A_23_P121657   | NM_005114       | HS3ST1        |
| 21 | A_23_P95640    | NM_001007544    | C1orf186      |
| 22 | A_33_P3216869  | NM_004378       | CRABP1        |
| 23 | A_23_P148990   | NM_031935       | HMCN1         |
| 24 | A_23_P93032    | NM_032367       | ZBED3         |
| 25 | A_23_P41942    | NM_006467       | POLR3G        |
| 26 | A_23_P134176   | NM_001024465    | SOD2          |
| 27 | A_23_P144916   | NM_005110       | GFPT2         |
| 28 | A_23_P253536   | NM_000908       | NPR3          |
| 29 | A_23_P82651    | NM_002523       | NPTX2         |
| 30 | A_24_P257416   | NM_002089       | CXCL2         |
| 31 | A_23_P417918   | NM_006211       | PENK          |
| 32 | A_23_P50081    | NM_014214       | IMPA2         |
| 33 | A_19_P00809119 | NR_015410       | CASC15        |
| 34 | A_21_P0005747  | ENST00000523572 |               |
| 35 | A_23_P321501   | NM_182908       | DHRS2         |
| 36 | A_24_P303097   | NM_031953       | SNX25         |
| 37 | A_23_P4592     | NM_001245       | SIGLEC6       |
| 38 | A_33_P3226212  | NM_001270408    | JAM2          |
| 39 | A_33_P3259393  | NM_178232       | HAPLN3        |
| 40 | A_21_P0003297  | lnc-SLC12A8-1:1 | lnc-SLC12A8-1 |
| 41 | A_21_P0014129  | NR_047568       | LINC00578     |
| 42 | A_22_P00009165 | NR_046696       | IPO9-AS1      |
| 43 | A_23_P110531   | NM_013409       | FST           |
| 44 | A_23_P121064   | NM_002852       | PTX3          |
| 45 | A_23_P131846   | NM_005985       | SNAI1         |
| 46 | A_22_P00006819 | NR_038852       | LINC00929     |
| 47 | A_33_P3249534  | NM_005382       | NEFM          |
| 48 | A_33_P3390172  | NM_001145271    | ADAMDEC1      |
| 49 | A_33_P3326483  | NM_004378       | CRABP1        |
| 50 | A_21_P0000504  | NR_023344       | RNU6ATAC      |
| 51 | A_23_P128372   | NM_002014       | FKBP4         |

|    |                |                 |               |
|----|----------------|-----------------|---------------|
| 1  |                |                 |               |
| 2  | A_33_P3235053  | NM_033452       | TRIM47        |
| 3  | A_22_P00000184 | Inc-ABHD16B-1:1 | Inc-ABHD16B-1 |
| 4  | A_23_P15146    | NM_001012631    | IL32          |
| 5  | A_23_P215634   | NM_001013398    | IGFBP3        |
| 6  |                |                 |               |
| 7  | A_22_P00014843 | ENST00000550684 |               |
| 8  | A_23_P4536     | NM_012307       | EPB41L3       |
| 9  | A_33_P3262012  | THC2603411      |               |
| 10 | A_21_P0001923  | ENST00000450667 |               |
| 11 | A_23_P215048   | NM_014702       | KIAA0408      |
| 12 | A_23_P358597   | NM_022361       | POPDC3        |
| 13 | A_23_P319583   | NM_014747       | RIMS3         |
| 14 | A_33_P3316878  | NM_024536       | CHPF          |
| 15 | A_33_P3405424  | NM_152899       | IL4I1         |
| 16 | A_23_P315364   | NM_002089       | CXCL2         |
| 17 | A_24_P262127   | NM_004165       | RRAD          |
| 18 |                |                 |               |
| 19 | A_33_P3252781  | NM_001012973    | PLAC9         |
| 20 | A_23_P123853   | NM_006274       | CCL19         |
| 21 | A_33_P3235546  | NM_014747       | RIMS3         |
| 22 | A_23_P202448   | NM_199168       | CXCL12        |
| 23 | A_23_P134085   | NM_173515       | CNKSR3        |
| 24 | A_23_P429998   | NM_006732       | FOSB          |
| 25 | A_23_P58676    | NM_001204375    | NPR3          |
| 26 | A_33_P3265301  | NM_152219       | GJD3          |
| 27 | A_21_P0014368  | ENST00000596510 | PLA2G4C       |
| 28 | A_23_P393620   | NM_006528       | TFPI2         |
| 29 | A_24_P239606   | NM_015675       | GADD45B       |
| 30 | A_23_P207564   | NM_001291470    | CCL4L2        |
| 31 | A_24_P238131   | NM_015551       | SUSD5         |
| 32 | A_24_P355944   | NM_004093       | EFNB2         |
| 33 | A_33_P3396527  | NM_006467       | POLR3G        |
| 34 | A_23_P40657    | NM_014291       | GCAT          |
| 35 | A_33_P3354607  | NM_001291470    | CCL4L2        |
| 36 | A_23_P34142    | NM_016303       | WBP5          |
| 37 | A_33_P3422802  | NM_025218       | ULBP1         |
| 38 | A_22_P00023255 | ENST00000438158 |               |
| 39 | A_23_P101992   | NM_006770       | MARCO         |
| 40 | A_21_P0014512  | AK097695        |               |
| 41 | A_33_P3269636  | NM_001166034    | SBSN          |
| 42 | A_32_P171061   | NM_005170       | ASCL2         |
| 43 | A_33_P3291454  | NM_198515       | CCDC172       |
| 44 | A_23_P119478   | NM_005755       | EBI3          |
| 45 | A_23_P55270    | NM_002988       | CCL18         |
| 46 | A_23_P23815    | NM_021194       | SLC30A1       |
| 47 | A_32_P87013    | NM_000584       | CXCL8         |
| 48 | A_23_P420942   | XM_005255956    | MT1E          |
| 49 | A_33_P3415430  | NM_005346       | HSPA1B        |
| 50 | A_23_P64372    | NM_001062       | TCN1          |
| 51 | A_23_P111132   | NM_005345       | HSPA1A        |
| 52 | A_23_P118392   | NM_016084       | RASD1         |
| 53 | A_32_P74409    | NM_001145033    | C11orf96      |

|                |                 |               |
|----------------|-----------------|---------------|
| A_33_P3316273  | NM_002983       | CCL3          |
| A_33_P3296181  | NM_001001437    | CCL3L3        |
| A_24_P156748   | NM_001004434    | SLC30A2       |
| A_24_P228130   | NM_001001437    | CCL3L3        |
| A_23_P422831   | NM_004816       | FAM189A2      |
| A_21_P0009476  | Inc-KATNAL2-4:1 | Inc-KATNAL2-4 |
| A_33_P3590259  | NM_004887       | CXCL14        |
| A_33_P3342628  | NM_021170       | HES4          |
| A_32_P135336   | NR_002556       | LOC388242     |
| A_33_P3367301  | NM_152219       | GJD3          |
| A_33_P3382331  | NM_002155       | HSPA6         |
| A_23_P365738   | NM_015193       | ARC           |
| A_23_P215913   | NM_001831       | CLU           |
| A_23_P54840    | NM_005946       | MT1A          |
| A_22_P00010235 | NM_005947       | MT1B          |
| A_23_P427703   | NR_001447       | MT1L          |
| A_23_P37983    | NM_005947       | MT1B          |
| A_33_P3315314  | NM_001276687    | MT1HL1        |
| A_33_P3231156  | ENST00000567054 |               |
| A_23_P206724   | NM_175617       | MT1E          |
| A_21_P0000671  | NM_175617       | MT1E          |
| A_23_P15174    | NM_005949       | MT1F          |
| A_33_P3368313  | NM_005951       | MT1H          |
| A_23_P114903   | NM_002155       | HSPA6         |
| A_33_P3236868  | NM_005952       | MT1X          |
| A_23_P66241    | NM_176870       | MT1M          |
| A_33_P3233645  | NM_001301267    | MT1G          |

|    |                                                                          |              |          |
|----|--------------------------------------------------------------------------|--------------|----------|
| 1  |                                                                          |              |          |
| 2  |                                                                          |              |          |
| 3  |                                                                          |              |          |
| 4  |                                                                          |              |          |
| 5  | description                                                              | adj. p value | log 2 FC |
| 6  | solute carrier family 39 (zinc transporter), member 10                   | 0            | -1.92    |
| 7  | protein phosphatase 1, regulatory subunit 27                             | 0            | -1.3     |
| 8  | matrix Gla protein                                                       | 0.000006     | -1.27    |
| 9  | matrix Gla protein                                                       | 0.000004     | -1.22    |
| 10 | neurotensin                                                              | 0.000505     | -1.21    |
| 11 | NA                                                                       | 0.000015     | -1.17    |
| 12 | NA                                                                       | 0            | -1.09    |
| 13 | G protein-coupled receptor 88                                            | 0.000078     | -1.07    |
| 14 | prepronociceptin                                                         | 0.000285     | -1.05    |
| 15 | matrix metalloproteinase 1                                               | 0.024905     | -1.04    |
| 16 | protein phosphatase 1, regulatory subunit 27                             | 0.000006     | -1.02    |
| 17 | ADAM metalloproteinase with thrombospondin type 1 motif, 4               | 0.000476     | -0.98    |
| 18 | cathepsin G                                                              | 0.000013     | -0.96    |
| 19 | carcinoembryonic antigen-related cell adhesion molecule 6 (non-specific) | 0            | -0.93    |
| 20 | dehydrogenase/reductase (SDR family) member 9                            | 0.000021     | -0.93    |
| 21 | NIM1 serine/threonine protein kinase                                     | 0.000135     | -0.91    |
| 22 | membrane-spanning 4-domains, subfamily A, member 6A                      | 0            | -0.91    |
| 23 | bone morphogenetic protein 4                                             | 0.000043     | -0.87    |
| 24 | NA                                                                       | 0.000007     | -0.86    |
| 25 | matrix metalloproteinase 12                                              | 0.000007     | -0.86    |
| 26 | pre T-cell antigen receptor alpha                                        | 0.000015     | -0.85    |
| 27 | immunoglobulin superfamily, member 1                                     | 0            | -0.85    |
| 28 | hes-related family bHLH transcription factor with YRPW motif 2           | 0.009415     | -0.84    |
| 29 | proteinase 3                                                             | 0.000024     | -0.83    |
| 30 | roundabout guidance receptor 4                                           | 0.000018     | -0.83    |
| 31 | prickle homolog 1                                                        | 0.000009     | -0.82    |
| 32 | tachykinin 4 (hemokinin)                                                 | 0.007265     | -0.82    |
| 33 | calsynenin 2                                                             | 0.000803     | -0.81    |
| 34 | sialic acid acetyltransferase                                            | 0.001131     | -0.8     |
| 35 | proprotein convertase subtilisin/kexin type 5                            | 0.000598     | -0.8     |
| 36 | nebulin-related anchoring protein                                        | 0.009562     | -0.8     |
| 37 | gliomedin                                                                | 0.000002     | -0.78    |
| 38 | telomerase reverse transcriptase                                         | 0.000029     | -0.77    |
| 39 | elastase, neutrophil expressed                                           | 0.000035     | -0.76    |
| 40 | vascular endothelial growth factor C                                     | 0.000897     | -0.76    |
| 41 | heparanase                                                               | 0.000001     | -0.76    |
| 42 | cancer susceptibility candidate 10                                       | 0.000006     | -0.76    |
| 43 | NA                                                                       | 0.000001     | -0.75    |
| 44 | killer cell lectin-like receptor subfamily C, member 1                   | 0.005743     | -0.75    |
| 45 | KIAA1462                                                                 | 0.000132     | -0.75    |
| 46 | eukaryotic translation elongation factor 1 alpha 2                       | 0.000011     | -0.75    |
| 47 | NA                                                                       | 0.000195     | -0.74    |
| 48 | ST8 alpha-N-acetyl-neuraminide alpha-2,8-sialyltransferase 5             | 0            | -0.74    |
| 49 | uncharacterized protein FLJ30901                                         | 0            | -0.73    |
| 50 | lysyl oxidase-like 4                                                     | 0.00073      | -0.72    |
| 51 | RAS guanyl releasing protein 2 (calcium and DAG-regulated)               | 0.000004     | -0.72    |
| 52 | NA                                                                       | 0.000011     | -0.71    |

|    |                                                                      |          |       |
|----|----------------------------------------------------------------------|----------|-------|
| 1  |                                                                      |          |       |
| 2  | butyrobetaine (gamma), 2-oxoglutarate dioxygenase (gamma-butyrob     | 0.002975 | -0.71 |
| 3  | chemokine (C-C motif) receptor 2                                     | 0.000893 | -0.71 |
| 4  | complement factor properdin                                          | 0.003849 | -0.71 |
| 5  | out at first homolog                                                 | 0.000011 | -0.7  |
| 6  | synaptotagmin XVII                                                   | 0.003077 | -0.69 |
| 7  | matrix metalloproteinase 7                                           | 0        | -0.69 |
| 8  | chemerin chemokine-like receptor 1                                   | 0.000144 | -0.69 |
| 9  | KIAA1462                                                             | 0.000006 | -0.69 |
| 10 | T-cell immunoglobulin and mucin domain containing 4                  | 0.000309 | -0.67 |
| 11 | NA                                                                   | 0.000022 | -0.66 |
| 12 | NA                                                                   | 0.000052 | -0.66 |
| 13 | long intergenic non-protein coding RNA 1140                          | 0.002089 | -0.66 |
| 14 | alpha tubulin acetyltransferase 1                                    | 0.000285 | -0.66 |
| 15 | selenoprotein P, plasma, 1                                           | 0.000362 | -0.65 |
| 16 | sel-1 suppressor of lin-12-like 3 (C. elegans)                       | 0.000011 | -0.65 |
| 17 | RAS guanyl releasing protein 2 (calcium and DAG-regulated)           | 0.000742 | -0.65 |
| 18 | aldo-keto reductase family 1, member C3                              | 0.000742 | -0.64 |
| 19 | metallothionein-like 5, testis-specific (tesmin)                     | 0.000898 | -0.64 |
| 20 | mast cell-expressed membrane protein 1                               | 0.000022 | -0.64 |
| 21 | secretory leukocyte peptidase inhibitor                              | 0.000729 | -0.64 |
| 22 | golgin A8 family, member T                                           | 0.003343 | -0.64 |
| 23 | uncharacterized LOC100130417                                         | 0.000404 | -0.63 |
| 24 | NA                                                                   | 0.000075 | -0.63 |
| 25 | annexin A3                                                           | 0.000349 | -0.63 |
| 26 | ribonuclease, RNase A family, 1 (pancreatic)                         | 0.002904 | -0.63 |
| 27 | lipid phosphate phosphatase-related protein type 3                   | 0.001869 | -0.63 |
| 28 | membrane-spanning 4-domains, subfamily A, member 6A                  | 0.002594 | -0.62 |
| 29 | chemokine (C-C motif) ligand 23                                      | 0.011006 | -0.62 |
| 30 | RAS guanyl releasing protein 2 (calcium and DAG-regulated)           | 0.000024 | -0.62 |
| 31 | oxytocin receptor                                                    | 0.023396 | -0.62 |
| 32 | steroidogenic acute regulatory protein                               | 0.000579 | -0.61 |
| 33 | family with sequence similarity 101, member B                        | 0        | -0.61 |
| 34 | collagen, type XI, alpha 2                                           | 0.000259 | -0.61 |
| 35 | uncharacterized LOC441242                                            | 0.00015  | -0.61 |
| 36 | NA                                                                   | 0.000728 | -0.6  |
| 37 | immunoglobulin superfamily, member 1                                 | 0.004496 | -0.6  |
| 38 | PTEN induced putative kinase 1                                       | 0.001009 | -0.6  |
| 39 | aldo-keto reductase family 1, member C1                              | 0.001702 | -0.6  |
| 40 | glutamate receptor, metabotropic 4                                   | 0.000114 | -0.6  |
| 41 | NA                                                                   | 0.000161 | -0.59 |
| 42 | collagen, type XI, alpha 2                                           | 0.000135 | -0.59 |
| 43 | integral membrane protein 2C                                         | 0.004108 | -0.59 |
| 44 | cut-like homeobox 2                                                  | 0.000565 | -0.58 |
| 45 | testis expressed 11                                                  | 0.000059 | -0.58 |
| 46 | leukocyte immunoglobulin-like receptor, subfamily B (with TM and ITI | 0.000106 | -0.58 |
| 47 | synaptopodin 2                                                       | 0.004924 | -0.58 |
| 48 | noggin                                                               | 0.000075 | -0.58 |
| 49 | chemokine (C-X-C motif) receptor 4                                   | 0.010878 | 0.58  |
| 50 | inositol 1,4,5-trisphosphate receptor, type 3                        | 0.000103 | 0.58  |
| 51 | cholesterol 25-hydroxylase                                           | 0.003533 | 0.58  |



|    |                                                                           |          |      |
|----|---------------------------------------------------------------------------|----------|------|
| 1  |                                                                           |          |      |
| 2  | phosphoserine aminotransferase 1                                          | 0.013164 | 0.59 |
| 3  | nuclear factor, erythroid 2-like 3                                        | 0.000049 | 0.59 |
| 4  | BMP and activin membrane-bound inhibitor                                  | 0.001702 | 0.59 |
| 5  | N-acetylneuraminate pyruvate lyase (dihydrodipicolinate synthase)         | 0.000285 | 0.59 |
| 6  | phosphoinositide-3-kinase, regulatory subunit 3 (gamma)                   | 0.000135 | 0.59 |
| 7  | NA                                                                        | 0.001043 | 0.59 |
| 8  | NA                                                                        | 0.000033 | 0.6  |
| 9  | dynamamin 3                                                               | 0.006084 | 0.6  |
| 10 | v-rel avian reticuloendotheliosis viral oncogene homolog B                | 0.000887 | 0.6  |
| 11 | NA                                                                        | 0.027628 | 0.61 |
| 12 | NA                                                                        | 0        | 0.61 |
| 13 | mannosidase, endo-alpha-like                                              | 0.000285 | 0.61 |
| 14 | FK506 binding protein 4, 59kDa                                            | 0.000742 | 0.61 |
| 15 | solute carrier family 7 (anionic amino acid transporter light chain, xc-) | 0.017565 | 0.61 |
| 16 | sorting nexin 25                                                          | 0.000004 | 0.62 |
| 17 | chemokine (C-C motif) receptor 7                                          | 0.000559 | 0.62 |
| 18 | cysteine and glycine-rich protein 2                                       | 0.000018 | 0.62 |
| 19 | collagen, type VI, alpha 1                                                | 0.011006 | 0.62 |
| 20 | heparan sulfate (glucosamine) 3-O-sulfotransferase 1                      | 0.000215 | 0.63 |
| 21 | chromosome 1 open reading frame 186                                       | 0        | 0.63 |
| 22 | cellular retinoic acid binding protein 1                                  | 0.000001 | 0.63 |
| 23 | hemocentin 1                                                              | 0.002148 | 0.64 |
| 24 | zinc finger, BED-type containing 3                                        | 0.000861 | 0.64 |
| 25 | polymerase (RNA) III (DNA directed) polypeptide G (32kD)                  | 0.000236 | 0.65 |
| 26 | superoxide dismutase 2, mitochondrial                                     | 0.000311 | 0.66 |
| 27 | glutamine-fructose-6-phosphate transaminase 2                             | 0.000001 | 0.66 |
| 28 | natriuretic peptide receptor 3                                            | 0.00081  | 0.66 |
| 29 | neuronal pentraxin II                                                     | 0.000067 | 0.66 |
| 30 | chemokine (C-X-C motif) ligand 2                                          | 0.007265 | 0.66 |
| 31 | proenkephalin                                                             | 0.000197 | 0.67 |
| 32 | inositol(myo)-1(or 4)-monophosphatase 2                                   | 0.000075 | 0.67 |
| 33 | cancer susceptibility candidate 15 (non-protein coding)                   | 0.012153 | 0.68 |
| 34 | NA                                                                        | 0.000451 | 0.68 |
| 35 | dehydrogenase/reductase (SDR family) member 2                             | 0.000226 | 0.68 |
| 36 | sorting nexin 25                                                          | 0.000007 | 0.68 |
| 37 | sialic acid binding Ig-like lectin 6                                      | 0.000195 | 0.69 |
| 38 | junctional adhesion molecule 2                                            | 0        | 0.69 |
| 39 | hyaluronan and proteoglycan link protein 3                                | 0.000002 | 0.69 |
| 40 | NA                                                                        | 0.000021 | 0.71 |
| 41 | NA                                                                        | 0        | 0.71 |
| 42 | NA                                                                        | 0.000006 | 0.72 |
| 43 | folliculin                                                                | 0.000077 | 0.72 |
| 44 | pentraxin 3, long                                                         | 0.001404 | 0.72 |
| 45 | snail family zinc finger 1                                                | 0        | 0.72 |
| 46 | NA                                                                        | 0        | 0.74 |
| 47 | neurofilament, medium polypeptide                                         | 0        | 0.74 |
| 48 | ADAM-like, decysin 1                                                      | 0.047487 | 0.75 |
| 49 | cellular retinoic acid binding protein 1                                  | 0        | 0.76 |
| 50 | NA                                                                        | 0        | 0.77 |
| 51 | FK506 binding protein 4, 59kDa                                            | 0.000012 | 0.77 |

|                                                                      |          |      |
|----------------------------------------------------------------------|----------|------|
| tripartite motif containing 47                                       | 0.000001 | 0.77 |
| NA                                                                   | 0.000009 | 0.78 |
| interleukin 32                                                       | 0.007698 | 0.78 |
| insulin-like growth factor binding protein 3                         | 0.00638  | 0.78 |
| NA                                                                   | 0.000217 | 0.79 |
| erythrocyte membrane protein band 4.1-like 3                         | 0.026679 | 0.79 |
| NA                                                                   | 0.000004 | 0.79 |
| NA                                                                   | 0.002489 | 0.8  |
| KIAA0408                                                             | 0.000046 | 0.81 |
| popeye domain containing 3                                           | 0.000122 | 0.81 |
| regulating synaptic membrane exocytosis 3                            | 0.000008 | 0.82 |
| chondroitin polymerizing factor                                      | 0.000001 | 0.83 |
| interleukin 4 induced 1                                              | 0.000001 | 0.83 |
| chemokine (C-X-C motif) ligand 2                                     | 0.000047 | 0.85 |
| Ras-related associated with diabetes                                 | 0.000121 | 0.85 |
| placenta-specific 9                                                  | 0.016934 | 0.85 |
| chemokine (C-C motif) ligand 19                                      | 0        | 0.88 |
| regulating synaptic membrane exocytosis 3                            | 0.000001 | 0.88 |
| chemokine (C-X-C motif) ligand 12                                    | 0        | 0.89 |
| CNKSR family member 3                                                | 0        | 0.9  |
| FBJ murine osteosarcoma viral oncogene homolog B                     | 0        | 0.9  |
| natriuretic peptide receptor 3                                       | 0        | 0.91 |
| gap junction protein, delta 3, 31.9kDa                               | 0        | 0.93 |
| NA                                                                   | 0.000024 | 0.94 |
| tissue factor pathway inhibitor 2                                    | 0.000024 | 0.94 |
| growth arrest and DNA-damage-inducible, beta                         | 0        | 0.94 |
| chemokine (C-C motif) ligand 4                                       | 0.00005  | 0.97 |
| sushi domain containing 5                                            | 0        | 0.97 |
| ephrin-B2                                                            | 0        | 0.97 |
| polymerase (RNA) III (DNA directed) polypeptide G (32kD)             | 0        | 0.97 |
| glycine C-acetyltransferase                                          | 0        | 0.99 |
| chemokine (C-C motif) ligand 4                                       | 0.000001 | 0.99 |
| WW domain binding protein 5                                          | 0        | 1    |
| UL16 binding protein 1                                               | 0        | 1    |
| NA                                                                   | 0        | 1.02 |
| macrophage receptor with collagenous structure                       | 0        | 1.07 |
| NA                                                                   | 0        | 1.15 |
| suprabasin                                                           | 0        | 1.16 |
| achaete-scute family bHLH transcription factor 2                     | 0        | 1.18 |
| coiled-coil domain containing 172                                    | 0.000007 | 1.22 |
| Epstein-Barr virus induced 3                                         | 0        | 1.24 |
| chemokine (C-C motif) ligand 18 (pulmonary and activation-regulated) | 0        | 1.25 |
| solute carrier family 30 (zinc transporter), member 1                | 0        | 1.28 |
| chemokine (C-X-C motif) ligand 8                                     | 0.000034 | 1.28 |
| metallothionein 1E                                                   | 0        | 1.31 |
| heat shock 70kDa protein 1B                                          | 0        | 1.36 |
| transcobalamin I (vitamin B12 binding protein, R binder family)      | 0        | 1.38 |
| heat shock 70kDa protein 1A                                          | 0        | 1.4  |
| RAS, dexamethasone-induced 1                                         | 0        | 1.4  |
| chromosome 11 open reading frame 96                                  | 0        | 1.47 |

|    |                                                       |          |      |
|----|-------------------------------------------------------|----------|------|
| 1  |                                                       |          |      |
| 2  | chemokine (C-C motif) ligand 3                        | 0        | 1.47 |
| 3  | chemokine (C-C motif) ligand 3-like 3                 | 0        | 1.55 |
| 4  | solute carrier family 30 (zinc transporter), member 2 | 0        | 1.59 |
| 5  | chemokine (C-C motif) ligand 3-like 3                 | 0.000029 | 1.61 |
| 6  | family with sequence similarity 189, member A2        | 0        | 1.63 |
| 7  | NA                                                    | 0        | 1.77 |
| 8  | chemokine (C-X-C motif) ligand 14                     | 0        | 1.85 |
| 9  | hes family bHLH transcription factor 4                | 0        | 1.88 |
| 10 | SAGA complex associated factor 29 pseudogene          | 0        | 1.96 |
| 11 | gap junction protein, delta 3, 31.9kDa                | 0        | 2.03 |
| 12 | heat shock 70kDa protein 6 (HSP70B)                   | 0.000003 | 2.33 |
| 13 | activity-regulated cytoskeleton-associated protein    | 0        | 2.53 |
| 14 | clusterin                                             | 0        | 2.57 |
| 15 | metallothionein 1A                                    | 0        | 2.99 |
| 16 | NA                                                    | 0        | 3.35 |
| 17 | metallothionein 1L (gene/pseudogene)                  | 0        | 3.42 |
| 18 | metallothionein 1B                                    | 0        | 3.43 |
| 19 | metallothionein 1H                                    | 0        | 3.63 |
| 20 | NA                                                    | 0.000003 | 3.71 |
| 21 | metallothionein 1E                                    | 0        | 3.82 |
| 22 | NA                                                    | 0        | 3.92 |
| 23 | metallothionein 1F                                    | 0        | 4.2  |
| 24 | metallothionein 1H                                    | 0        | 4.26 |
| 25 | heat shock 70kDa protein 6 (HSP70B)                   | 0        | 4.62 |
| 26 | metallothionein 1X                                    | 0        | 4.65 |
| 27 | metallothionein 1M                                    | 0        | 5.05 |
| 28 | metallothionein 1G                                    | 0        | 5.96 |
| 29 |                                                       |          |      |
| 30 |                                                       |          |      |
| 31 |                                                       |          |      |
| 32 |                                                       |          |      |
| 33 |                                                       |          |      |
| 34 |                                                       |          |      |
| 35 |                                                       |          |      |
| 36 |                                                       |          |      |
| 37 |                                                       |          |      |
| 38 |                                                       |          |      |
| 39 |                                                       |          |      |
| 40 |                                                       |          |      |
| 41 |                                                       |          |      |
| 42 |                                                       |          |      |
| 43 |                                                       |          |      |
| 44 |                                                       |          |      |
| 45 |                                                       |          |      |
| 46 |                                                       |          |      |
| 47 |                                                       |          |      |
| 48 |                                                       |          |      |
| 49 |                                                       |          |      |
| 50 |                                                       |          |      |
| 51 |                                                       |          |      |
| 52 |                                                       |          |      |
| 53 |                                                       |          |      |
| 54 |                                                       |          |      |
| 55 |                                                       |          |      |
| 56 |                                                       |          |      |
| 57 |                                                       |          |      |
| 58 |                                                       |          |      |
| 59 |                                                       |          |      |
| 60 |                                                       |          |      |

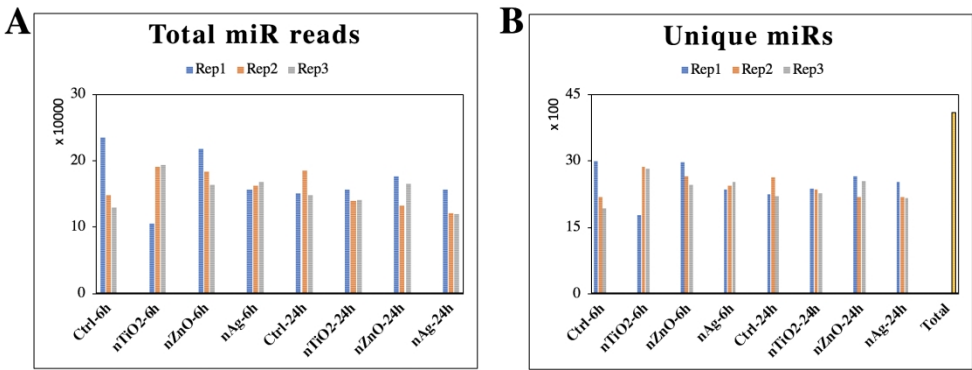

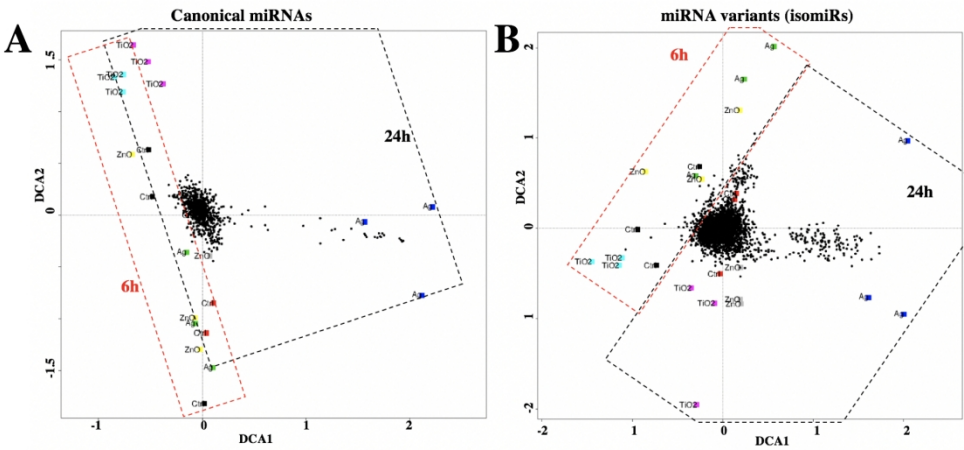

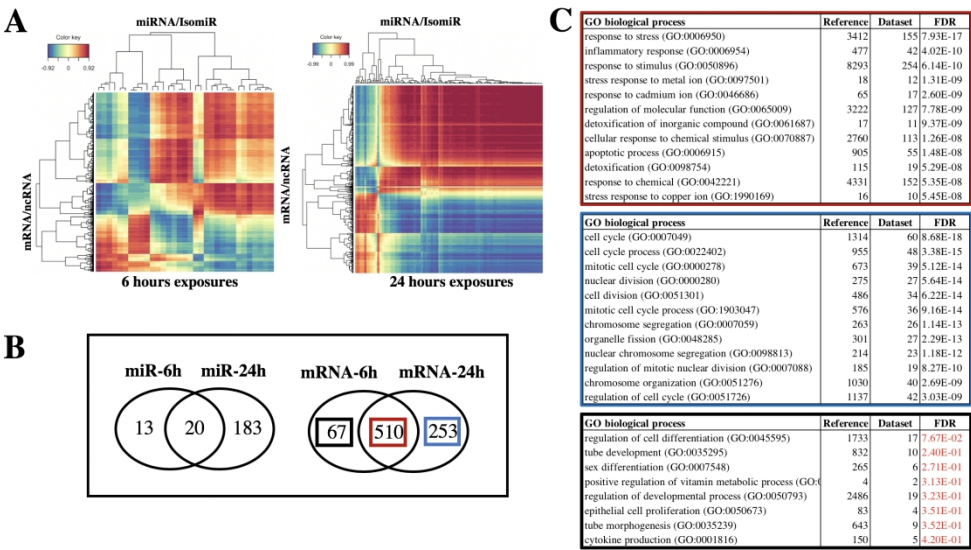

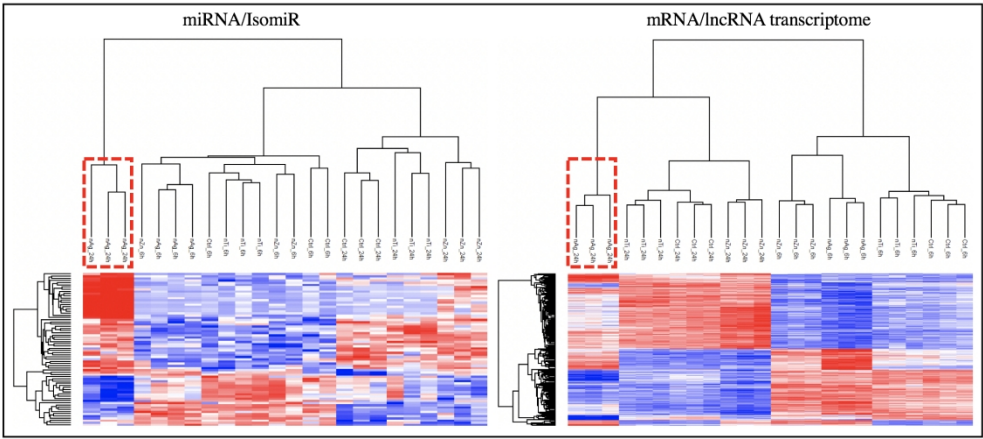

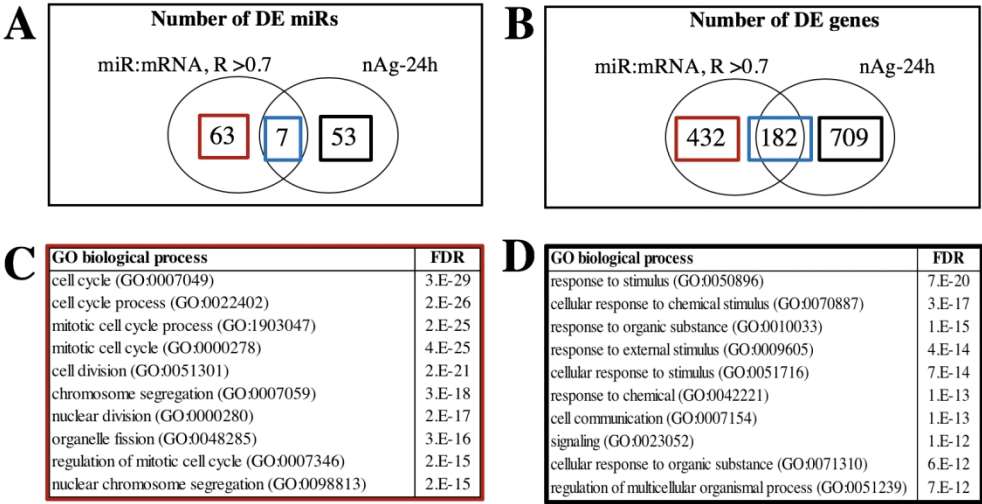



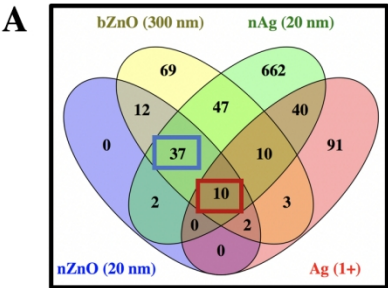

**B**

| GO biological process                                  | FDR      |
|--------------------------------------------------------|----------|
| stress response to metal ion (GO:0097501)              | 5.09E-14 |
| zinc ion homeostasis (GO:0055069)                      | 6.21E-14 |
| cellular zinc ion homeostasis (GO:0006882)             | 6.27E-14 |
| detoxification of inorganic compound (GO:0061687)      | 6.78E-14 |
| stress response to copper ion (GO:1990169)             | 4.67E-12 |
| detoxification of copper ion (GO:0010273)              | 5.60E-12 |
| cellular response to zinc ion (GO:0071294)             | 4.26E-11 |
| response to zinc ion (GO:0010043)                      | 6.08E-11 |
| cellular transition metal ion homeostasis (GO:0046916) | 1.11E-10 |
| cellular response to copper ion (GO:0071280)           | 1.16E-10 |

| GO biological process                             | FDR      |
|---------------------------------------------------|----------|
| stress response to metal ion (GO:0097501)         | 4.09E-04 |
| detoxification of inorganic compound (GO:0061687) | 5.45E-04 |
| stress response to copper ion (GO:1990169)        | 5.96E-04 |
| cellular response to zinc ion (GO:0071294)        | 7.19E-04 |
| cellular response to copper ion (GO:0071280)      | 1.12E-03 |
| detoxification of copper ion (GO:0010273)         | 1.19E-03 |
| cellular zinc ion homeostasis (GO:0006882)        | 1.25E-03 |
| zinc ion homeostasis (GO:0055069)                 | 1.40E-03 |
| cellular response to cadmium ion (GO:0071276)     | 1.45E-03 |
| response to copper ion (GO:0046688)               | 2.11E-03 |

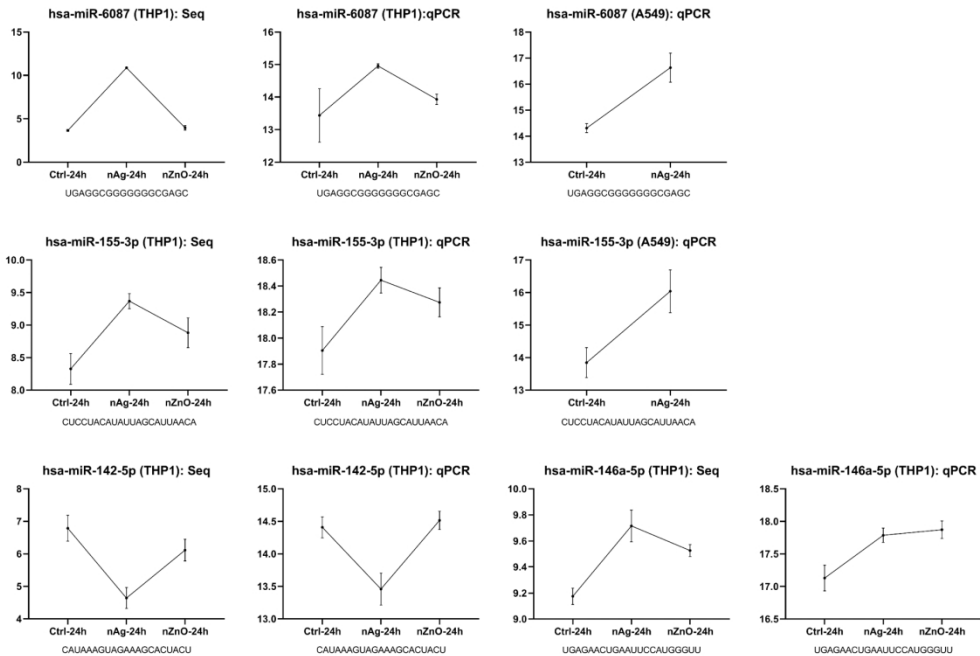

Supplement: Supplementary file 1 [file 1]
